# Supplementary material for: Identification and expression analysis of the SPL transcription factor family in rye (Secale cereale L.) in response to abiotic stresses
Source: Research Square preprint supplement (doi:10.21203/rs.3.rs-3142765/v1), 2023-07-13
Supplement: Supplementary file 1 [file 0532ab009d1a509dfb3614d6.xlsx]

## Sheet: Sheet1
Supplementary Table 5 Primers of sequences.
Group	Gene ID	Forward primer (5`- 3`)	Reverse primer (5`- 3`)
I	ScSPL1	AAGTGCCGGGTTGTGAGG	CCGTCGATCATGACCGCA
VI	ScSPL2	GTTCCACGTGCTCACCGA	GAGTCCTTGGACGTCGCC
VI	ScSPL3	AGCGCGATCAGCTTCCTC	ATGGAGCTGCATGGCGTT
II	ScSPL4	TGGCTCCTGTCCTTTGCG	CGCTTGTTGACAGCTGCG
VIII	ScSPL5	AGTTCGACGAGGCCAAGC	CGAAACCGTGCACCAACG
VI	ScSPL6	GCCAAGCTGTCTCGAGCA	AACATGGCCTGTCCGAGC
VI	ScSPL7	CAAGTCCTCCTCGGCAGC	CGACGGAAACCACGGGAA
VII	ScSPL8	CGCGTTCCACGAGCAGTA	GGGGTGATGGTGAAGGCC
II	ScSPL9	CCACCATCACCAGCAGCA	GCCATCGATGCCTCCTCC
VII	ScSPL10	ATCTCAAGATGCCGCCCG	CCACAGAGCACTCCTGCC
II	ScSPL11	CCACCATCACCAGCAGCA	GCCATCGATGCCTCCTCC
VIII	ScSPL12	ACCACCCAGCAGGCTCTA	ACCAGTTGGACGAGCTGC
VIII	ScSPL13	ACCACCCAGCAGGCTCTA	ACCAGTTGGACGAGCTGC
VIII	ScSPL14	TGAGCGAGGTCCATCCGA	TTGCTGGAGTGGCCGAAG
VII	ScSPL15	TTCCACTTGCTCGCGGAG	AGGACGCGAACCTTGTCG
V	ScSPL16	TATGCCGCATGGTGCACA	TGAAGATCCGGGGCTCCA
VI	ScSPL17	CCTACTGATGCGCTCCCG	CGGTGGTAGTGCTTGGCA
V	ScSPL18	GAAGGAGAAGCGGGCCAG	AACTTGGTGTGGGCCTCG
II	ScSPL19	AAGCGGGTCTTCGGTTGG	TCCTAGACACCTCGGCCC
II	ScSPL20	AGGATGGCGGTGTGAACG	ACCTTGTGACGCCGATGG
VII	ScSPL21	TTCCACTTGCTCGCGGAG	AGGACGCGAACCTTGTCG
	CqEF	CGTGTTGGATTCTGGTGATG	AGCCACATATGCGAGCTTCT
