# Supplementary material for: Identification and expression analysis of the SPL transcription factor family in rye (Secale cereale L.) in response to abiotic stresses
Source: Research Square preprint supplement (doi:10.21203/rs.3.rs-3142765/v1), 2023-07-13
Supplement: Supplementary file 2 [file 3879be5e519fb5edf5aa3009.xlsx]

## Sheet: Zea mays
Supplementary Table 3 One-to-one orthologous relationships between Zea mays and Secale cereale L..
Gene ID	Gene Name	Chromosome Position		Gene ID	Chromosome Position
GWHASIY00000002	ScSPL5	Chr2	==	transcript:Zm00001d026175_T001	10
GWHASIY00000002	ScSPL6	Chr2	==	transcript:Zm00001d026491_T001	10
GWHASIY00000002	ScSPL2	Chr2	==	transcript:Zm00001d036692_T001	6
GWHASIY00000002	ScSPL2	Chr2	==	transcript:Zm00001d046906_T001	9
GWHASIY00000003	ScSPL8	Chr3	==	transcript:Zm00001d042319_T001	3
GWHASIY00000003	ScSPL8	Chr3	==	transcript:Zm00001d012015_T001	8
GWHASIY00000004	ScSPL11	Chr4	==	transcript:Zm00001d031487_T001	1
GWHASIY00000004	ScSPL12	Chr4	==	transcript:Zm00001d006028_T001	2
GWHASIY00000004	ScSPL10	Chr4	==	transcript:Zm00001d006091_T001	2
GWHASIY00000004	ScSPL10	Chr4	==	transcript:Zm00001d042319_T001	3
GWHASIY00000004	ScSPL10	Chr4	==	transcript:Zm00001d049822_T001	4
GWHASIY00000004	ScSPL10	Chr4	==	transcript:Zm00001d021056_T001	7
GWHASIY00000005	ScSPL14	Chr5	==	transcript:Zm00001d031451_T001	1
GWHASIY00000005	ScSPL14	Chr5	==	transcript:Zm00001d006028_T001	2
GWHASIY00000005	ScSPL15	Chr5	==	transcript:Zm00001d006091_T001	2
GWHASIY00000005	ScSPL14	Chr5	==	transcript:Zm00001d020941_T001	7
GWHASIY00000005	ScSPL15	Chr5	==	transcript:Zm00001d021056_T001	7
GWHASIY00000006	ScSPL17	Chr6	==	transcript:Zm00001d053756_T001	4
GWHASIY00000006	ScSPL16	Chr6	==	transcript:Zm00001d015233_T001	5
GWHASIY00000006	ScSPL16	Chr6	==	transcript:Zm00001d014698_T001	5
GWHASIY00000006	ScSPL17	Chr6	==	transcript:Zm00001d036692_T001	6
GWHASIY00000006	ScSPL17	Chr6	==	transcript:Zm00001d046906_T001	9
GWHASIY00000007	ScSPL19	Chr7	==	transcript:Zm00001d034730_T002	1

## Sheet: Aegilops tauschii Coss.
Supplementary Table 3 One-to-one orthologous relationships between Aegilops tauschii Coss. and Secale cereale L..
Gene ID	Gene Name	Chromosome Position		Gene ID	Chromosome Position
GWHASIY00000001	ScSPL1	Chr1	==	transcript:AET1Gv20619300.1	1D
GWHASIY00000002	ScSPL5	Chr2	==	transcript:AET2Gv20915400.2	2D
GWHASIY00000002	ScSPL2	Chr2	==	transcript:AET6Gv20390500.2	6D
GWHASIY00000002	ScSPL2	Chr2	==	transcript:AET7Gv21205900.11	7D
GWHASIY00000003	ScSPL8	Chr3	==	transcript:AET3Gv20960100.2	3D
GWHASIY00000004	ScSPL12	Chr4	==	transcript:AET5Gv20624900.3	5D
GWHASIY00000004	ScSPL10	Chr4	==	transcript:AET5Gv20667300.1	5D
GWHASIY00000004	ScSPL11	Chr4	==	transcript:AET7Gv20612200.1	7D
GWHASIY00000004	ScSPL12	Chr4	==	transcript:AET7Gv20605000.11	7D
GWHASIY00000004	ScSPL10	Chr4	==	transcript:AET7Gv20637900.1	7D
GWHASIY00000005	ScSPL14	Chr5	==	transcript:AET5Gv20624900.3	5D
GWHASIY00000005	ScSPL15	Chr5	==	transcript:AET5Gv20667300.1	5D
GWHASIY00000005	ScSPL15	Chr5	==	transcript:AET7Gv20637900.1	7D
GWHASIY00000005	ScSPL14	Chr5	==	transcript:AET7Gv20605000.11	7D
GWHASIY00000006	ScSPL16	Chr6	==	transcript:AET6Gv20284700.4	6D
GWHASIY00000007	ScSPL19	Chr7	==	transcript:AET5Gv21144000.4	5D

## Sheet: Arabidopsis thaliana
Supplementary Table 3 One-to-one orthologous relationships between Arabidopsis thaliana and Secale cereale L..
Gene ID	Gene Name	Chromosome Position		Gene ID	Chromosome Position
GWHASIY00000005	ScSPL14	Chr5	==	transcript:AT2G42200.1	2
GWHASIY00000005	ScSPL14	Chr5	==	transcript:AT3G57920.1	3

## Sheet: Hordeum vulgare L.
Supplementary Table 3 One-to-one orthologous relationships between Hordeum vulgare L. and Secale cereale L..
Gene ID	Gene Name	Chromosome Position		Gene ID	Chromosome Position
GWHASIY00000001	ScSPL1	Chr1	==	transcript:HORVU1Hr1G060770.6	chr1H
GWHASIY00000002	ScSPL5	Chr2	==	transcript:HORVU2Hr1G097580.1	chr2H
GWHASIY00000002	ScSPL2	Chr2	==	transcript:HORVU7Hr1G110980.3	chr7H
GWHASIY00000004	ScSPL10	Chr4	==	transcript:HORVU5Hr1G076380.9	chr5H
GWHASIY00000004	ScSPL11	Chr4	==	transcript:HORVU7Hr1G051400.2	chr7H
GWHASIY00000005	ScSPL14	Chr5	==	transcript:HORVU5Hr1G073440.7	chr5H
GWHASIY00000005	ScSPL15	Chr5	==	transcript:HORVU5Hr1G076380.9	chr5H
GWHASIY00000006	ScSPL16	Chr6	==	transcript:HORVU6Hr1G019700.3	chr6H
GWHASIY00000007	ScSPL19	Chr7	==	transcript:HORVU5Hr1G117190.5	chr5H

## Sheet: Oryza sativa L.
Supplementary Table 3 One-to-one orthologous relationships between Oryza sativa L. and Secale cereale L..
Gene ID	Gene Name	Chromosome Position		Gene ID	Chromosome Position
GWHASIY00000001	ScSPL1	Chr1	==	transcript:Os05t0408200-01	5
GWHASIY00000002	ScSPL5	Chr2	==	transcript:Os04t0551500-01	4
GWHASIY00000002	ScSPL2	Chr2	==	transcript:Os06t0659100-00	6
GWHASIY00000003	ScSPL8	Chr3	==	transcript:Os01t0922600-01	1
GWHASIY00000004	ScSPL10	Chr4	==	transcript:Os01t0922600-01	1
GWHASIY00000004	ScSPL12	Chr4	==	transcript:Os08t0509600-01	8
GWHASIY00000004	ScSPL11	Chr4	==	transcript:Os08t0513700-01	8
GWHASIY00000004	ScSPL10	Chr4	==	transcript:Os08t0531600-01	8
GWHASIY00000004	ScSPL10	Chr4	==	transcript:Os09t0507100-00	9
GWHASIY00000005	ScSPL14	Chr5	==	transcript:Os08t0509600-01	8
GWHASIY00000005	ScSPL15	Chr5	==	transcript:Os08t0531600-01	8
GWHASIY00000005	ScSPL14	Chr5	==	transcript:Os09t0491532-01	9
GWHASIY00000005	ScSPL15	Chr5	==	transcript:Os09t0507100-00	9
GWHASIY00000006	ScSPL16	Chr6	==	transcript:Os02t0139400-01	2
GWHASIY00000006	ScSPL17	Chr6	==	transcript:Os06t0659100-00	6
GWHASIY00000007	ScSPL19	Chr7	==	transcript:Os03t0833300-02	3

## Sheet: Triticum aestivum L
Supplementary Table 3 One-to-one orthologous relationships between Triticum aestivum L. and Secale cereale L..
Gene ID	Gene Name	Chromosome Position		Gene ID	Chromosome Position
GWHASIY00000001	ScSPL1	Chr1	==	transcript:TraesARI1A01G270400.1	1A
GWHASIY00000001	ScSPL1	Chr1	==	transcript:TraesARI1B01G282200.1	1B
GWHASIY00000001	ScSPL1	Chr1	==	transcript:TraesARI1D01G281300.1	1D
GWHASIY00000002	ScSPL5	Chr2	==	transcript:TraesARI2A01G446000.1	2A
GWHASIY00000002	ScSPL5	Chr2	==	transcript:TraesARI2B01G469300.1	2B
GWHASIY00000002	ScSPL5	Chr2	==	transcript:TraesARI2D01G441500.1	2D
GWHASIY00000002	ScSPL3	Chr2	==	transcript:TraesARI7A01G540900.1	7A
GWHASIY00000002	ScSPL2	Chr2	==	transcript:TraesARI7A01G541000.1	7A
GWHASIY00000002	ScSPL3	Chr2	==	transcript:TraesARI7B01G110600.1	7B
GWHASIY00000002	ScSPL2	Chr2	==	transcript:TraesARI7D01G527000.1	7D
GWHASIY00000003	ScSPL8	Chr3	==	transcript:TraesARI3A01G461500.1	3A
GWHASIY00000003	ScSPL8	Chr3	==	transcript:TraesARI3B01G516000.1	3B
GWHASIY00000003	ScSPL8	Chr3	==	transcript:TraesARI3D01G450000.1	3D
GWHASIY00000004	ScSPL10	Chr4	==	transcript:TraesARI5A01G299100.1	5A
GWHASIY00000004	ScSPL10	Chr4	==	transcript:TraesARI5B01G149300.1	5B
GWHASIY00000004	ScSPL11	Chr4	==	transcript:TraesARI5B01G166400.1	5B
GWHASIY00000004	ScSPL12	Chr4	==	transcript:TraesARI5B01G163900.1	5B
GWHASIY00000004	ScSPL11	Chr4	==	transcript:TraesARI7A01G278700.1	7A
GWHASIY00000004	ScSPL10	Chr4	==	transcript:TraesARI7A01G291400.1	7A
GWHASIY00000004	ScSPL11	Chr4	==	transcript:TraesARI7D01G273500.1	7D
GWHASIY00000004	ScSPL10	Chr4	==	transcript:TraesARI7D01G286800.1	7D
GWHASIY00000004	ScSPL12	Chr4	==	transcript:TraesARI7D01G270400.1	7D
GWHASIY00000005	ScSPL14	Chr5	==	transcript:TraesARI5A01G277800.1	5A
GWHASIY00000005	ScSPL15	Chr5	==	transcript:TraesARI5A01G299100.1	5A
GWHASIY00000005	ScSPL15	Chr5	==	transcript:TraesARI5B01G149300.1	5B
GWHASIY00000005	ScSPL14	Chr5	==	transcript:TraesARI5D01G297100.1	5D
GWHASIY00000005	ScSPL15	Chr5	==	transcript:TraesARI5D01G318900.1	5D
GWHASIY00000005	ScSPL14	Chr5	==	transcript:TraesARI7A01G276200.1	7A
GWHASIY00000005	ScSPL15	Chr5	==	transcript:TraesARI7A01G291400.1	7A
GWHASIY00000005	ScSPL14	Chr5	==	transcript:TraesARI7B01G510600.1	7B
GWHASIY00000005	ScSPL15	Chr5	==	transcript:TraesARI7B01G532600.1	7B
GWHASIY00000005	ScSPL14	Chr5	==	transcript:TraesARI7D01G270400.1	7D
GWHASIY00000006	ScSPL17	Chr6	==	transcript:TraesARI6A01G163600.1	6A
GWHASIY00000006	ScSPL16	Chr6	==	transcript:TraesARI6A01G119500.1	6A
GWHASIY00000006	ScSPL16	Chr6	==	transcript:TraesARI6B01G157800.1	6B
GWHASIY00000006	ScSPL16	Chr6	==	transcript:TraesARI6D01G117700.1	6D
GWHASIY00000007	ScSPL19	Chr7	==	transcript:TraesARI4A01G382300.1	4A
GWHASIY00000007	ScSPL19	Chr7	==	transcript:TraesARI5D01G557900.1	5D
GWHASIY00000007	ScSPL19	Chr7	==	transcript:TraesARI7B01G773200.1	7B
