# Supplementary material for: Identification and expression analysis of the SPL transcription factor family in rye (Secale cereale L.) in response to abiotic stresses
Source: Research Square preprint supplement (doi:10.21203/rs.3.rs-3142765/v1), 2023-07-13
Supplement: Supplementary file 3 [file a075da2dbd89782ff8a26a60.xlsx]

## Sheet: cis acting elements
Supplementary Table S4 Cis-regulatory elements in the promoter region of SPL genes.
Category	Cis-regulatory elements	Sequence	Number of genes	Function
Other elements	OCT	CGCGGATC	2
Other elements	3-AF1 binding site	TAAGAGAGGAA	1
Devolepment related elements	AAGAA-motif	GAAAGAA	12
Promoter related element	A-box	CCGTCC	16	cis-acting regulatory element
Hormone responsive elements	ABRE	ACGTG	21	cis-acting element involved in the abscisic acid responsiveness
Other elements	ABRE3a	TACGTG	6
Other elements	ABRE4	CACGTA	6
Light responsive elements	ACE	GCGACGTACC	8	cis-acting element involved in light responsiveness
Other elements	AC-I	GCTTACCTACCA	2
Other elements	AC-II	CCACCAACCCCC	6
Light responsive elements	AE-box	AGAAACAA	11	part of a module for light response
Environmental stress-related element	ARE	AAACCA	14	cis-acting regulatory element essential for the anaerobic induction
Devolepment related elements	as-1	TGACG	20
Other elements	AT~ABRE	TACGTGTC	1
Other elements	AT~TATA-box	TATATA	9
Light responsive elements	ATC-motif	AGCTATCCA	2	part of a conserved DNA module involved in light responsiveness
Light responsive elements	ATCT-motif	AATCTAATCC	2	part of a conserved DNA module involved in light responsiveness
Site-binding related elements	AT-rich element	ATAGAAATCAA	3	binding site of AT-rich DNA binding protein (ATBP-1)
Other elements	AuxRE	TGTCTCAATAAG	1
Hormone responsive elements	AuxRR-core	GGTCCAT	4	cis-acting regulatory element involved in auxin responsiveness
Light responsive elements	Box 4	ATTAAT	5	part of a conserved DNA module involved in light responsiveness
Other elements	Box II -like sequence	TCCGTGTACCA	2
Other elements	box S	AGCCACC	8
Promoter related element	CAAT-box	CAAT	21	common cis-acting element in promoter and enhancer regions
Other elements	CAG-motif	GAAAGGCAGAC	2
Other elements	CARE	CAACTCAC	2
Other elements	CAT-box	GCCACT	13	cis-acting regulatory element related to meristem expression
Other elements	CCAAT-box	CAACGG	10
Promoter related element	CCGTCC motif	CCGTCC	16
Other elements	CCGTCC-box	CCGTCC	16
Hormone responsive elements	CGTCA-motif	CGTCA	20	cis-acting regulatory element involved in the MeJA-responsiveness
Other elements	circadian	CAAAGATATC	1	cis-acting regulatory element involved in circadian control
Other elements	CTAG-motif	ACTAGCAGAA	5
Other elements	dOCT	CACGGATC	5
Other elements	DRE core	GCCGAC	14
Other elements	DRE1	ACCGAGA	3
Other elements	ERE	ATTTTAAA	3
Other elements	F-box	CTATTCTCATT	1
Light responsive elements	GA-motif	ATAGATAA	1	part of a light responsive element
Light responsive elements	Gap-box	CAAATGAA(A/G)A	1	part of a light responsive element
Other elements	GARE-motif	TCTGTTG	5	gibberellin-responsive element
Light responsive elements	GATA-motif	GATAGGA	11	part of a light responsive element
Other elements	GATT-motif	CTCCTGATTGGA	1
Light responsive elements	G-Box	CACGTT	21	cis-acting regulatory element involved in light responsiveness
Other elements	GC-motif	CCCCCG	18
Other elements	GCN4_motif	TGAGTCA	2	cis-regulatory element involved in endosperm expression
Other elements	GRA	CACTGGCCGCCC	1
Light responsive elements	GT1-motif	GGTTAAT	13	light responsive element
Other elements	H-box	CCTACCNNNNNNNCTNNNNA	1
Other elements	HD-Zip 1	CAAT(A/T)ATTG	5	element involved in differentiation of the palisade mesophyll cells
Light responsive elements	I-box	gGATAAGGTG	6	part of a light responsive element
Other elements	L-box	ATCCCACCTAC	1
Other elements	LTR	CCGAAA	13	cis-acting element involved in low-temperature responsiveness
Other elements	MBS	CAACTG	15	MYB binding site involved in drought-inducibility
Site-binding related elements	MBSI	TTTTTACGGTTA	4	MYB binding site involved in flavonoid biosynthetic genes regulation
Other elements	motif I	gGTACGTGGCG	1
Other elements	MRE	AACCTAA	2	MYB binding site involved in light responsiveness
Other elements	MSA-like	(T/C)C(T/C)AACGG(T/C)(T/C)A	1	cis-acting element involved in cell cycle regulation
Other elements	Myb	TAACTG	21
Other elements	MYB recognition site	CCGTTG	10
Other elements	Myb-binding site	CAACAG	9
Other elements	MYB-like sequence	TAACCA	8
Other elements	MYC	CATGTG	20
Other elements	NON	CAACGGCCACG	1
Other elements	NON-box	AGATCGACG	1
Other elements	O2-site	GATGA(C/T)(A/G)TG(A/G)	11	cis-acting regulatory element involved in zein metabolism regulation
Other elements	P-box	CCTTTTG	11	gibberellin-responsive element
Other elements	Pc-CMA2c	GCCCACGCA	2
Other elements	RY-element	CATGCATG	7
Other elements	Sp1	GGGCGG	16	light responsive element
Other elements	STRE	AGGGG	21
Other elements	TATA	TATAAAAT	2
Promoter related element	TATA-box	TATAAAT	21	core promoter element around -3 of transcription start
Other elements	TATC-box	TATCCCA	1	cis-acting element involved in gibberellin-responsiveness
Other elements	TCA	TCATCTTCAT	6
Other elements	TCA-element	CCATCTTTTT	4	cis-acting element involved in salicylic acid responsiveness
Other elements	TCCC-motif	TCTCCCT	14	part of a light responsive element
Other elements	TC-rich repeats	GTTTTCTTAC	4	cis-acting element involved in defense and stress responsiveness
Other elements	TCT-motif	TCTTAC	10	part of a light responsive element
Other elements	TGACG-motif	TGACG	20	cis-acting regulatory element involved in the MeJA-responsiveness
Other elements	TGA-element	AACGAC	12	auxin-responsive element
Site-binding related elements	Unnamed__1	CGTGG	19
Other elements	Unnamed__10	TCCACGTAGA	1
Other elements	Unnamed__12	TCCACGTAGA	1
Other elements	Unnamed__14	TCCACGTAGA	1
Other elements	Unnamed__16	GCTGCCCGTC	3
Other elements	Unnamed__2	CCCCGG	15
Other elements	Unnamed__4	CTCC	21
Site-binding related elements	Unnamed__6	taTAAATATct	2
Other elements	Unnamed__8	TCCACGTAGA	1
Other elements	W box	TTGACC	10
Other elements	WRE3	CCACCT	15
Other elements	WUN-motif	CCATTTCAA	2

## Sheet: Details of cis acting elements
Supplementary Table S4 Cis-regulatory elements in the promoter region of SPL genes.
Gene name	Cis-regulatory elements	Sequence	position	Base number	Strand Matrix	Organism	Function
ScSPL1	TCA-element	CCATCTTTTT	1189	9	-	Nicotiana tabacum	cis-acting element involved in salicylic acid responsiveness
ScSPL1	WRE3	CCACCT	51	6	-	Pisum sativum
ScSPL1	WRE3	CCACCT	669	6	-	Pisum sativum
ScSPL1	CCGTCC motif	CCGTCC	1445	6	+	Nicotiana tabacum
ScSPL1	CCGTCC motif	CCGTCC	1764	6	+	Nicotiana tabacum
ScSPL1	TATA-box	TATAAAT	215	7	-	Brassica juncea	core promoter element around -30 of transcription start
ScSPL1	TATA-box	TATAAA	216	6	-	Helianthus annuus	core promoter element around -30 of transcription start
ScSPL1	TATA-box	TATAA	217	5	-	Arabidopsis thaliana	core promoter element around -30 of transcription start
ScSPL1	TATA-box	TATA	218	4	+	Arabidopsis thaliana	core promoter element around -30 of transcription start
ScSPL1	TATA-box	TATA	359	4	+	Arabidopsis thaliana	core promoter element around -30 of transcription start
ScSPL1	TATA-box	ATATAT	411	6	+	Brassica napus	core promoter element around -30 of transcription start
ScSPL1	TATA-box	TATA	412	4	+	Arabidopsis thaliana	core promoter element around -30 of transcription start
ScSPL1	TATA-box	ATATAT	521	6	+	Brassica napus	core promoter element around -30 of transcription start
ScSPL1	TATA-box	TATA	522	4	+	Arabidopsis thaliana	core promoter element around -30 of transcription start
ScSPL1	TATA-box	ATATAA	967	6	+	Brassica oleracea	core promoter element around -30 of transcription start
ScSPL1	TATA-box	TATA	968	4	+	Arabidopsis thaliana	core promoter element around -30 of transcription start
ScSPL1	TATA-box	TATATA	1011	6	-	Arabidopsis thaliana	core promoter element around -30 of transcription start
ScSPL1	TATA-box	TATA	1013	4	-	Arabidopsis thaliana	core promoter element around -30 of transcription start
ScSPL1	TATA-box	ATATAT	1087	6	-	Brassica napus	core promoter element around -30 of transcription start
ScSPL1	TATA-box	TATATA	1088	6	-	Arabidopsis thaliana	core promoter element around -30 of transcription start
ScSPL1	TATA-box	ATATAT	1089	6	-	Brassica napus	core promoter element around -30 of transcription start
ScSPL1	TATA-box	TATA	1090	4	-	Arabidopsis thaliana	core promoter element around -30 of transcription start
ScSPL1	TATA-box	ATTATA	1100	6	+	Brassica napus	core promoter element around -30 of transcription start
ScSPL1	TATA-box	TATAA	1101	5	-	Arabidopsis thaliana	core promoter element around -30 of transcription start
ScSPL1	TATA-box	TATA	1102	4	-	Arabidopsis thaliana	core promoter element around -30 of transcription start
ScSPL1	TATA-box	ATATAT	1126	6	-	Brassica napus	core promoter element around -30 of transcription start
ScSPL1	TATA-box	TATATTTATATTT	1127	12	+	Avena sativa	core promoter element around -30 of transcription start
ScSPL1	TATA-box	ATATAT	1128	6	-	Brassica napus	core promoter element around -30 of transcription start
ScSPL1	TATA-box	TATATA	1129	6	-	Arabidopsis thaliana	core promoter element around -30 of transcription start
ScSPL1	TATA-box	ATATAT	1130	6	-	Brassica napus	core promoter element around -30 of transcription start
ScSPL1	TATA-box	TATATA	1131	6	-	Arabidopsis thaliana	core promoter element around -30 of transcription start
ScSPL1	TATA-box	ATATAT	1132	6	-	Brassica napus	core promoter element around -30 of transcription start
ScSPL1	TATA-box	TATA	1133	4	-	Arabidopsis thaliana	core promoter element around -30 of transcription start
ScSPL1	TATA-box	taTATAAAtc	1165	9	+	Arabidopsis thaliana	core promoter element around -30 of transcription start
ScSPL1	TATA-box	ATATAA	1166	6	+	Brassica oleracea	core promoter element around -30 of transcription start
ScSPL1	TATA-box	TATA	1167	4	-	Arabidopsis thaliana	core promoter element around -30 of transcription start
ScSPL1	TATA-box	ccTATAAAaa	1276	9	+	Arabidopsis thaliana	core promoter element around -30 of transcription start
ScSPL1	TATA-box	TATA	1318	4	-	Arabidopsis thaliana	core promoter element around -30 of transcription start
ScSPL1	TATA-box	TATA	1533	4	-	Arabidopsis thaliana	core promoter element around -30 of transcription start
ScSPL1	Sp1	GGGCGG	1449	6	-	Oryza sativa	light responsive element
ScSPL1	Sp1	GGGCGG	1475	6	-	Oryza sativa	light responsive element
ScSPL1	ERE	ATTTTAAA	8	8	-	Nicotiana glutinos
ScSPL1	ERE	ATTTCATA	1066	8	-	Nicotiana glutinos
ScSPL1	CCGTCC-box	CCGTCC	1445	6	+	Petroselinum hortense
ScSPL1	CCGTCC-box	CCGTCC	1764	6	+	Petroselinum hortense
ScSPL1	Unnamed__2	CCCCGG	1758	6	+	Zea mays
ScSPL1	box S	AGCCACC	878	7	-	Arabidopsis thaliana
ScSPL1	CAAT-box	CAAT	14	4	-	Nicotiana glutinosa	common cis-acting element in promoter and enhancer regions
ScSPL1	CAAT-box	CAAAT	137	5	+	Pisum sativum	common cis-acting element in promoter and enhancer regions
ScSPL1	CAAT-box	CAAT	162	4	-	Nicotiana glutinosa	common cis-acting element in promoter and enhancer regions
ScSPL1	CAAT-box	CAAAT	200	5	+	Pisum sativum	common cis-acting element in promoter and enhancer regions
ScSPL1	CAAT-box	CCAAT	212	5	+	Arabidopsis thaliana	common cis-acting element in promoter and enhancer regions
ScSPL1	CAAT-box	CAAT	213	4	+	Nicotiana glutinosa	common cis-acting element in promoter and enhancer regions
ScSPL1	CAAT-box	CAAT	257	4	-	Nicotiana glutinosa	common cis-acting element in promoter and enhancer regions
ScSPL1	CAAT-box	CAAAT	339	5	-	Pisum sativum	common cis-acting element in promoter and enhancer regions
ScSPL1	CAAT-box	CAAT	607	4	-	Nicotiana glutinosa	common cis-acting element in promoter and enhancer regions
ScSPL1	CAAT-box	CAAT	820	4	-	Nicotiana glutinosa	common cis-acting element in promoter and enhancer regions
ScSPL1	CAAT-box	CAAAT	954	5	-	Pisum sativum	common cis-acting element in promoter and enhancer regions
ScSPL1	CAAT-box	CAAAT	999	5	-	Pisum sativum	common cis-acting element in promoter and enhancer regions
ScSPL1	CAAT-box	CAAAT	1043	5	+	Pisum sativum	common cis-acting element in promoter and enhancer regions
ScSPL1	CAAT-box	CAAT	1048	4	+	Nicotiana glutinosa	common cis-acting element in promoter and enhancer regions
ScSPL1	CAAT-box	CAAT	1052	4	-	Nicotiana glutinosa	common cis-acting element in promoter and enhancer regions
ScSPL1	CAAT-box	CAAT	1082	4	-	Nicotiana glutinosa	common cis-acting element in promoter and enhancer regions
ScSPL1	CAAT-box	CAAAT	1093	5	-	Pisum sativum	common cis-acting element in promoter and enhancer regions
ScSPL1	CAAT-box	CAAT	1261	4	-	Nicotiana glutinosa	common cis-acting element in promoter and enhancer regions
ScSPL1	CAAT-box	CCAAT	1331	5	+	Arabidopsis thaliana	common cis-acting element in promoter and enhancer regions
ScSPL1	CAAT-box	CAAT	1332	4	+	Nicotiana glutinosa	common cis-acting element in promoter and enhancer regions
ScSPL1	CAAT-box	CCAAT	1460	5	+	Arabidopsis thaliana	common cis-acting element in promoter and enhancer regions
ScSPL1	CAAT-box	CAAT	1461	4	+	Nicotiana glutinosa	common cis-acting element in promoter and enhancer regions
ScSPL1	CAAT-box	CCAAT	1785	5	+	Arabidopsis thaliana	common cis-acting element in promoter and enhancer regions
ScSPL1	CAAT-box	CAAT	1786	4	+	Nicotiana glutinosa	common cis-acting element in promoter and enhancer regions
ScSPL1	CAAT-box	CCAAT	1827	5	+	Arabidopsis thaliana	common cis-acting element in promoter and enhancer regions
ScSPL1	CAAT-box	CAAT	1828	4	+	Nicotiana glutinosa	common cis-acting element in promoter and enhancer regions
ScSPL1	STRE	AGGGG	94	5	-	Arabidopsis thaliana
ScSPL1	STRE	AGGGG	194	5	-	Arabidopsis thaliana
ScSPL1	STRE	AGGGG	276	5	+	Arabidopsis thaliana
ScSPL1	STRE	AGGGG	1864	5	-	Arabidopsis thaliana
ScSPL1	ABRE	ACGTG	869	5	-	Arabidopsis thaliana	cis-acting element involved in the abscisic acid responsiveness
ScSPL1	ABRE	ACGTG	947	5	-	Arabidopsis thaliana	cis-acting element involved in the abscisic acid responsiveness
ScSPL1	ABRE	ACGTG	1382	5	-	Arabidopsis thaliana	cis-acting element involved in the abscisic acid responsiveness
ScSPL1	ABRE	ACGTG	1561	5	+	Arabidopsis thaliana	cis-acting element involved in the abscisic acid responsiveness
ScSPL1	ABRE	ACGTG	1872	5	-	Arabidopsis thaliana	cis-acting element involved in the abscisic acid responsiveness
ScSPL1	P-box	CCTTTTG	1019	7	-	Oryza sativa	gibberellin-responsive element
ScSPL1	P-box	CCTTTTG	1395	7	-	Oryza sativa	gibberellin-responsive element
ScSPL1	WUN-motif	CCATTTCAA	116	9	+	Nicotiana glutinosa
ScSPL1	G-Box	CACGTT	869	6	+	Pisum sativum	cis-acting regulatory element involved in light responsiveness
ScSPL1	G-Box	CACGTT	947	6	+	Pisum sativum	cis-acting regulatory element involved in light responsiveness
ScSPL1	G-Box	CACGTT	1872	6	+	Pisum sativum	cis-acting regulatory element involved in light responsiveness
ScSPL1	AE-box	AGAAACAA	234	8	-	Arabidopsis thaliana	part of a module for light response
ScSPL1	G-box	TAAACGTG	947	8	-	Brassica oleracea	cis-acting regulatory element involved in light responsiveness
ScSPL1	G-box	CACGTC	1382	6	+	Zea mays	cis-acting regulatory element involved in light responsiveness
ScSPL1	G-box	CACGTC	1560	6	-	Zea mays	cis-acting regulatory element involved in light responsiveness
ScSPL1	MBS	CAACTG	1751	6	+	Arabidopsis thaliana	MYB binding site involved in drought-inducibility
ScSPL1	Unnamed__4	CTCC	39	4	-	Petroselinum hortense
ScSPL1	Unnamed__4	CTCC	49	4	-	Petroselinum hortense
ScSPL1	Unnamed__4	CTCC	584	4	-	Petroselinum hortense
ScSPL1	Unnamed__4	CTCC	613	4	-	Petroselinum hortense
ScSPL1	Unnamed__4	CTCC	651	4	-	Petroselinum hortense
ScSPL1	Unnamed__4	CTCC	803	4	+	Petroselinum hortense
ScSPL1	Unnamed__4	CTCC	842	4	+	Petroselinum hortense
ScSPL1	Unnamed__4	CTCC	847	4	-	Petroselinum hortense
ScSPL1	Unnamed__4	CTCC	858	4	+	Petroselinum hortense
ScSPL1	Unnamed__4	CTCC	911	4	-	Petroselinum hortense
ScSPL1	Unnamed__4	CTCC	921	4	-	Petroselinum hortense
ScSPL1	Unnamed__4	CTCC	943	4	+	Petroselinum hortense
ScSPL1	Unnamed__4	CTCC	1197	4	-	Petroselinum hortense
ScSPL1	Unnamed__4	CTCC	1219	4	-	Petroselinum hortense
ScSPL1	Unnamed__4	CTCC	1244	4	+	Petroselinum hortense
ScSPL1	Unnamed__4	CTCC	1361	4	+	Petroselinum hortense
ScSPL1	Unnamed__4	CTCC	1442	4	+	Petroselinum hortense
ScSPL1	Unnamed__4	CTCC	1470	4	+	Petroselinum hortense
ScSPL1	Unnamed__4	CTCC	1509	4	+	Petroselinum hortense
ScSPL1	Unnamed__4	CTCC	1681	4	+	Petroselinum hortense
ScSPL1	Unnamed__4	CTCC	1807	4	+	Petroselinum hortense
ScSPL1	Unnamed__4	CTCC	1810	4	+	Petroselinum hortense
ScSPL1	Unnamed__4	CTCC	1819	4	-	Petroselinum hortense
ScSPL1	Unnamed__4	CTCC	1861	4	+	Petroselinum hortense
ScSPL1	Unnamed__4	CTCC	1867	4	+	Petroselinum hortense
ScSPL1	Unnamed__4	CTCC	1884	4	+	Petroselinum hortense
ScSPL1	Unnamed__4	CTCC	1918	4	-	Petroselinum hortense
ScSPL1	TGACG-motif	TGACG	1684	5	-	Hordeum vulgare	cis-acting regulatory element involved in the MeJA-responsiveness
ScSPL1	TGACG-motif	TGACG	1692	5	-	Hordeum vulgare	cis-acting regulatory element involved in the MeJA-responsiveness
ScSPL1	TGACG-motif	TGACG	1700	5	-	Hordeum vulgare	cis-acting regulatory element involved in the MeJA-responsiveness
ScSPL1	ARE	AAACCA	1283	6	+	Zea mays	cis-acting regulatory element essential for the anaerobic induction
ScSPL1	ARE	AAACCA	1952	6	-	Zea mays	cis-acting regulatory element essential for the anaerobic induction
ScSPL1	CGTCA-motif	CGTCA	1684	5	+	Hordeum vulgare	cis-acting regulatory element involved in the MeJA-responsiveness
ScSPL1	CGTCA-motif	CGTCA	1692	5	+	Hordeum vulgare	cis-acting regulatory element involved in the MeJA-responsiveness
ScSPL1	CGTCA-motif	CGTCA	1700	5	+	Hordeum vulgare	cis-acting regulatory element involved in the MeJA-responsiveness
ScSPL1	TGA-element	AACGAC	713	6	+	Brassica oleracea	auxin-responsive element
ScSPL1	Myb	TAACTG	449	6	+	Arabidopsis thaliana
ScSPL1	Myb	TAACTG	688	6	-	Arabidopsis thaliana
ScSPL1	Myb	CAACTG	1751	6	+	Arabidopsis thaliana
ScSPL1	TCCC-motif	TCTCCCT	1243	7	+	Spinacia oleracea	part of a light responsive element
ScSPL1	LTR	CCGAAA	45	6	-	Hordeum vulgare	cis-acting element involved in low-temperature responsiveness
ScSPL1	LTR	CCGAAA	896	6	-	Hordeum vulgare	cis-acting element involved in low-temperature responsiveness
ScSPL1	LTR	CCGAAA	1957	6	-	Hordeum vulgare	cis-acting element involved in low-temperature responsiveness
ScSPL1	W box	TTGACC	1001	6	+	Arabidopsis thaliana
ScSPL1	W box	TTGACC	1309	6	-	Arabidopsis thaliana
ScSPL1	Unnamed__1	CGTGG	581	5	+	Zea mays
ScSPL1	Unnamed__1	CGTGG	946	5	-	Zea mays
ScSPL1	Unnamed__1	CGTGG	1216	5	+	Zea mays
ScSPL1	Unnamed__1	CGTGG	1381	5	-	Zea mays
ScSPL1	Unnamed__1	CGTGG	1562	5	+	Zea mays
ScSPL1	Unnamed__1	CGTGG	1724	5	+	Zea mays
ScSPL1	Unnamed__1	CGTGG	1871	5	-	Zea mays
ScSPL1	Unnamed__1	CGTGG	1950	5	+	Zea mays
ScSPL1	Unnamed__1	CGTGG	1979	5	+	Zea mays
ScSPL1	as-1	TGACG	1684	5	-	Arabidopsis thaliana
ScSPL1	as-1	TGACG	1692	5	-	Arabidopsis thaliana
ScSPL1	as-1	TGACG	1700	5	-	Arabidopsis thaliana
ScSPL1	MYC	CATGTG	82	6	-	Arabidopsis thaliana
ScSPL1	MYC	CATTTG	137	6	-	Arabidopsis thaliana
ScSPL1	MYC	CATGTG	179	6	-	Arabidopsis thaliana
ScSPL1	MYC	CATGTG	428	6	-	Arabidopsis thaliana
ScSPL1	MYC	CATGTG	1287	6	+	Arabidopsis thaliana
ScSPL1	DRE1	ACCGAGA	887	7	-	Zea mays
ScSPL1	A-box	CCGTCC	1445	6	+	Petroselinum crispum	sequence conserved in alpha-amylase promoters
ScSPL1	A-box	CCGTCC	1764	6	+	Petroselinum crispum	sequence conserved in alpha-amylase promoters
ScSPL1	AC-I	GCTTACCTACCA	1776	11	+	Arabidopsis thaliana
ScSPL1	AT~TATA-box	TATATA	1011	6	-	Arabidopsis thaliana
ScSPL1	AT~TATA-box	TATATA	1088	6	-	Arabidopsis thaliana
ScSPL1	AT~TATA-box	TATATA	1127	6	-	Arabidopsis thaliana
ScSPL1	AT~TATA-box	TATATA	1129	6	-	Arabidopsis thaliana
ScSPL1	AT~TATA-box	TATATA	1131	6	-	Arabidopsis thaliana
ScSPL10	DRE core	GCCGAC	1073	6	-	Arabidopsis thaliana
ScSPL10	MBS	CAACTG	698	6	-	Arabidopsis thaliana	MYB binding site involved in drought-inducibility
ScSPL10	MBS	CAACTG	1164	6	+	Arabidopsis thaliana	MYB binding site involved in drought-inducibility
ScSPL10	Unnamed__4	CTCC	35	4	-	Petroselinum hortense
ScSPL10	Unnamed__4	CTCC	97	4	-	Petroselinum hortense
ScSPL10	Unnamed__4	CTCC	192	4	-	Petroselinum hortense
ScSPL10	Unnamed__4	CTCC	275	4	-	Petroselinum hortense
ScSPL10	Unnamed__4	CTCC	284	4	-	Petroselinum hortense
ScSPL10	Unnamed__4	CTCC	287	4	-	Petroselinum hortense
ScSPL10	Unnamed__4	CTCC	444	4	+	Petroselinum hortense
ScSPL10	Unnamed__4	CTCC	533	4	+	Petroselinum hortense
ScSPL10	Unnamed__4	CTCC	609	4	-	Petroselinum hortense
ScSPL10	Unnamed__4	CTCC	642	4	+	Petroselinum hortense
ScSPL10	Unnamed__4	CTCC	665	4	+	Petroselinum hortense
ScSPL10	Unnamed__4	CTCC	799	4	+	Petroselinum hortense
ScSPL10	Unnamed__4	CTCC	948	4	+	Petroselinum hortense
ScSPL10	Unnamed__4	CTCC	1198	4	+	Petroselinum hortense
ScSPL10	Unnamed__4	CTCC	1248	4	+	Petroselinum hortense
ScSPL10	Unnamed__4	CTCC	1466	4	+	Petroselinum hortense
ScSPL10	Unnamed__4	CTCC	1559	4	+	Petroselinum hortense
ScSPL10	Unnamed__4	CTCC	1579	4	+	Petroselinum hortense
ScSPL10	Unnamed__4	CTCC	1597	4	+	Petroselinum hortense
ScSPL10	Unnamed__4	CTCC	1781	4	-	Petroselinum hortense
ScSPL10	Unnamed__4	CTCC	1814	4	+	Petroselinum hortense
ScSPL10	Unnamed__4	CTCC	1852	4	-	Petroselinum hortense
ScSPL10	Unnamed__4	CTCC	1863	4	-	Petroselinum hortense
ScSPL10	Unnamed__4	CTCC	1884	4	-	Petroselinum hortense
ScSPL10	Unnamed__4	CTCC	1968	4	+	Petroselinum hortense
ScSPL10	MYB-like sequence	TAACCA	1138	6	-	Arabidopsis thaliana
ScSPL10	ABRE4	CACGTA	252	6	+	Zea mays
ScSPL10	ABRE4	CACGTA	307	6	+	Zea mays
ScSPL10	ABRE4	CACGTA	461	6	+	Zea mays
ScSPL10	ABRE4	CACGTA	860	6	-	Zea mays
ScSPL10	ABRE4	CACGTA	1960	6	-	Zea mays
ScSPL10	ABRE4	CACGTA	1988	6	-	Zea mays
ScSPL10	G-box	CACGAC	110	6	-	Zea mays	cis-acting regulatory element involved in light responsiveness
ScSPL10	G-box	CACGTC	127	6	+	Zea mays	cis-acting regulatory element involved in light responsiveness
ScSPL10	G-box	TACGTG	252	6	-	Arabidopsis thaliana	cis-acting regulatory element involved in light responsiveness
ScSPL10	G-box	TACGTG	307	6	-	Arabidopsis thaliana	cis-acting regulatory element involved in light responsiveness
ScSPL10	G-box	GCCACGTGGA	427	9	-	Arabidopsis thaliana	cis-acting regulatory element involved in light responsiveness
ScSPL10	G-box	CACGTG	429	6	+	Arabidopsis thaliana	cis-acting regulatory element involved in light responsiveness
ScSPL10	G-box	TACGTG	461	6	-	Arabidopsis thaliana	cis-acting regulatory element involved in light responsiveness
ScSPL10	G-box	CACGAC	669	6	+	Zea mays	cis-acting regulatory element involved in light responsiveness
ScSPL10	G-box	TACGTG	860	6	+	Arabidopsis thaliana	cis-acting regulatory element involved in light responsiveness
ScSPL10	G-box	CACGAC	1363	6	+	Zea mays	cis-acting regulatory element involved in light responsiveness
ScSPL10	G-box	TACGTG	1960	6	+	Arabidopsis thaliana	cis-acting regulatory element involved in light responsiveness
ScSPL10	G-box	TACGTG	1988	6	+	Arabidopsis thaliana	cis-acting regulatory element involved in light responsiveness
ScSPL10	Myb	CAACTG	698	6	-	Arabidopsis thaliana
ScSPL10	Myb	CAACTG	1164	6	+	Arabidopsis thaliana
ScSPL10	TCCC-motif	TCTCCCT	1465	7	+	Spinacia oleracea	part of a light responsive element
ScSPL10	TCCC-motif	TCTCCCT	1861	7	-	Spinacia oleracea	part of a light responsive element
ScSPL10	AAGAA-motif	GAAAGAA	901	7	+	Avena sativa
ScSPL10	GT1-motif	GGTTAAT	1656	7	-	Avena sativa	light responsive element
ScSPL10	GT1-motif	GGTTAA	1657	6	-	Arabidopsis thaliana	light responsive element
ScSPL10	ARE	AAACCA	362	6	+	Zea mays	cis-acting regulatory element essential for the anaerobic induction
ScSPL10	ARE	AAACCA	1335	6	+	Zea mays	cis-acting regulatory element essential for the anaerobic induction
ScSPL10	ARE	AAACCA	1340	6	+	Zea mays	cis-acting regulatory element essential for the anaerobic induction
ScSPL10	Unnamed__1	CGTGG	306	5	-	Zea mays
ScSPL10	Unnamed__1	CGTGG	365	5	-	Zea mays
ScSPL10	Unnamed__1	CGTGG	431	5	+	Zea mays
ScSPL10	Unnamed__1	CGTGG	668	5	-	Zea mays
ScSPL10	AT~TATA-box	TATATAAA	1011	8	-	Arabidopsis thaliana
ScSPL10	AT~TATA-box	TATATA	1013	6	-	Arabidopsis thaliana
ScSPL10	AT~TATA-box	TATATA	1015	6	-	Arabidopsis thaliana
ScSPL10	HD-Zip 1	CAAT(A/T)ATTG	1351	8	-	Arabidopsis thaliana	element involved in differentiation of the palisade mesophyll cells
ScSPL10	Gap-box	CAAATGAA(A/G)A	908	10	+	Arabidopsis thaliana	part of a light responsive element
ScSPL10	A-box	CCGTCC	46	6	-	Petroselinum crispum	sequence conserved in alpha-amylase promoters
ScSPL10	MYC	CATGTG	645	6	-	Arabidopsis thaliana
ScSPL10	MYC	CATTTG	809	6	-	Arabidopsis thaliana
ScSPL10	MYC	CATTTG	908	6	-	Arabidopsis thaliana
ScSPL10	MYC	CATTTG	1029	6	-	Arabidopsis thaliana
ScSPL10	TATA-box	TATA	54	4	+	Arabidopsis thaliana	core promoter element around -30 of transcription start
ScSPL10	TATA-box	TATA	686	4	+	Arabidopsis thaliana	core promoter element around -30 of transcription start
ScSPL10	TATA-box	ATTATA	848	6	+	Brassica napus	core promoter element around -30 of transcription start
ScSPL10	TATA-box	TATAA	849	5	-	Arabidopsis thaliana	core promoter element around -30 of transcription start
ScSPL10	TATA-box	TATA	850	4	+	Arabidopsis thaliana	core promoter element around -30 of transcription start
ScSPL10	TATA-box	ATTATA	856	6	+	Brassica napus	core promoter element around -30 of transcription start
ScSPL10	TATA-box	TATAA	857	5	-	Arabidopsis thaliana	core promoter element around -30 of transcription start
ScSPL10	TATA-box	TATA	858	4	+	Arabidopsis thaliana	core promoter element around -30 of transcription start
ScSPL10	TATA-box	taTATAAAtc	1009	9	-	Arabidopsis thaliana	core promoter element around -30 of transcription start
ScSPL10	TATA-box	TATAAAT	1010	7	-	Brassica juncea	core promoter element around -30 of transcription start
ScSPL10	TATA-box	TATAAA	1011	6	-	Helianthus annuus	core promoter element around -30 of transcription start
ScSPL10	TATA-box	TATATAA	1012	7	-	Arabidopsis thaliana	core promoter element around -30 of transcription start
ScSPL10	TATA-box	TATATA	1013	6	-	Arabidopsis thaliana	core promoter element around -30 of transcription start
ScSPL10	TATA-box	ATATAT	1014	6	-	Brassica napus	core promoter element around -30 of transcription start
ScSPL10	TATA-box	TATATA	1015	6	-	Arabidopsis thaliana	core promoter element around -30 of transcription start
ScSPL10	TATA-box	TATA	1017	4	-	Arabidopsis thaliana	core promoter element around -30 of transcription start
ScSPL10	TATA-box	TATAAAT	1226	7	-	Brassica juncea	core promoter element around -30 of transcription start
ScSPL10	TATA-box	TATAAA	1227	6	-	Helianthus annuus	core promoter element around -30 of transcription start
ScSPL10	TATA-box	TATAA	1228	5	-	Arabidopsis thaliana	core promoter element around -30 of transcription start
ScSPL10	TATA-box	TATA	1229	4	-	Arabidopsis thaliana	core promoter element around -30 of transcription start
ScSPL10	GC-motif	CCCCCG	116	6	+	Zea mays
ScSPL10	Sp1	GGGCGG	119	6	-	Oryza sativa	light responsive element
ScSPL10	CCGTCC motif	CCGTCC	46	6	-	Nicotiana tabacum
ScSPL10	MYB recognition site	CCGTTG	264	6	+	Arabidopsis thaliana
ScSPL10	WRE3	CCACCT	194	6	-	Pisum sativum
ScSPL10	WRE3	CCACCT	1679	6	-	Pisum sativum
ScSPL10	ABRE3a	TACGTG	252	6	-	Zea mays
ScSPL10	ABRE3a	TACGTG	307	6	-	Zea mays
ScSPL10	ABRE3a	TACGTG	461	6	-	Zea mays
ScSPL10	ABRE3a	TACGTG	860	6	+	Zea mays
ScSPL10	ABRE3a	TACGTG	1960	6	+	Zea mays
ScSPL10	ABRE3a	TACGTG	1988	6	+	Zea mays
ScSPL10	CAAT-box	CAAT	326	4	-	Nicotiana glutinosa	common cis-acting element in promoter and enhancer regions
ScSPL10	CAAT-box	CAAAT	449	5	+	Pisum sativum	common cis-acting element in promoter and enhancer regions
ScSPL10	CAAT-box	CAAT	573	4	-	Nicotiana glutinosa	common cis-acting element in promoter and enhancer regions
ScSPL10	CAAT-box	CCAAT	656	5	+	Arabidopsis thaliana	common cis-acting element in promoter and enhancer regions
ScSPL10	CAAT-box	CAAT	657	4	+	Nicotiana glutinosa	common cis-acting element in promoter and enhancer regions
ScSPL10	CAAT-box	CAAT	704	4	+	Nicotiana glutinosa	common cis-acting element in promoter and enhancer regions
ScSPL10	CAAT-box	CAAAT	809	5	+	Pisum sativum	common cis-acting element in promoter and enhancer regions
ScSPL10	CAAT-box	CAAAT	878	5	-	Pisum sativum	common cis-acting element in promoter and enhancer regions
ScSPL10	CAAT-box	CAAAT	908	5	+	Pisum sativum	common cis-acting element in promoter and enhancer regions
ScSPL10	CAAT-box	CAAAT	1029	5	+	Pisum sativum	common cis-acting element in promoter and enhancer regions
ScSPL10	CAAT-box	CAAAT	1218	5	+	Pisum sativum	common cis-acting element in promoter and enhancer regions
ScSPL10	CAAT-box	CAAT	1318	4	+	Nicotiana glutinosa	common cis-acting element in promoter and enhancer regions
ScSPL10	CAAT-box	CAAT	1323	4	+	Nicotiana glutinosa	common cis-acting element in promoter and enhancer regions
ScSPL10	CAAT-box	CCAAT	1350	5	+	Arabidopsis thaliana	common cis-acting element in promoter and enhancer regions
ScSPL10	CAAT-box	CAAT	1351	4	+	Nicotiana glutinosa	common cis-acting element in promoter and enhancer regions
ScSPL10	CAAT-box	CAAT	1356	4	-	Nicotiana glutinosa	common cis-acting element in promoter and enhancer regions
ScSPL10	CAAT-box	CAAT	1422	4	-	Nicotiana glutinosa	common cis-acting element in promoter and enhancer regions
ScSPL10	CAAT-box	CAAAT	1448	5	+	Pisum sativum	common cis-acting element in promoter and enhancer regions
ScSPL10	CAAT-box	CAAT	1525	4	-	Nicotiana glutinosa	common cis-acting element in promoter and enhancer regions
ScSPL10	CAAT-box	CCAAT	1569	5	-	Arabidopsis thaliana	common cis-acting element in promoter and enhancer regions
ScSPL10	CAAT-box	CAAT	1604	4	-	Nicotiana glutinosa	common cis-acting element in promoter and enhancer regions
ScSPL10	CAAT-box	CAAAT	1630	5	-	Pisum sativum	common cis-acting element in promoter and enhancer regions
ScSPL10	CAAT-box	CAAT	1654	4	+	Nicotiana glutinosa	common cis-acting element in promoter and enhancer regions
ScSPL10	CCAAT-box	CAACGG	264	6	-	Hordeum vulgare
ScSPL10	AT~ABRE	TACGTGTC	1960	8	+	Arabidopsis thaliana
ScSPL10	circadian	CAAAGATATC	1535	9	-	Lycopersicon esculentum	cis-acting regulatory element involved in circadian control
ScSPL10	CCGTCC-box	CCGTCC	46	6	-	Petroselinum hortense
ScSPL10	G-Box	CACGTGAAA	426	9	-	Pisum sativum	cis-acting regulatory element involved in light responsiveness
ScSPL10	G-Box	CACGTG	429	6	+	Pisum sativum	cis-acting regulatory element involved in light responsiveness
ScSPL10	RY-element	CATGCATG	206	8	+	Helianthus annuus
ScSPL10	RY-element	CATGCATG	647	8	+	Helianthus annuus
ScSPL10	RY-element	CATGCATG	1184	8	-	Helianthus annuus
ScSPL10	RY-element	CATGCATG	1188	8	-	Helianthus annuus
ScSPL10	AE-box	AGAAACAA	955	8	-	Arabidopsis thaliana	part of a module for light response
ScSPL10	MYB	CAACCA	838	6	-	Arabidopsis thaliana
ScSPL10	MYB	TAACCA	1138	6	-	Arabidopsis thaliana
ScSPL10	P-box	CCTTTTG	556	7	-	Oryza sativa	gibberellin-responsive element
ScSPL10	STRE	AGGGG	215	5	-	Arabidopsis thaliana
ScSPL10	STRE	AGGGG	441	5	-	Arabidopsis thaliana
ScSPL10	STRE	AGGGG	1778	5	+	Arabidopsis thaliana
ScSPL10	STRE	AGGGG	1791	5	+	Arabidopsis thaliana
ScSPL10	ABRE	ACGTG	127	5	-	Arabidopsis thaliana	cis-acting element involved in the abscisic acid responsiveness
ScSPL10	ABRE	CGTACGTGCA	250	10	-	Hordeum vulgare	cis-acting element involved in the abscisic acid responsiveness
ScSPL10	ABRE	ACGTG	252	5	-	Arabidopsis thaliana	cis-acting element involved in the abscisic acid responsiveness
ScSPL10	ABRE	ACGTG	307	5	-	Arabidopsis thaliana	cis-acting element involved in the abscisic acid responsiveness
ScSPL10	ABRE	CACGTG	429	6	+	Arabidopsis thaliana	cis-acting element involved in the abscisic acid responsiveness
ScSPL10	ABRE	ACGTG	430	5	+	Arabidopsis thaliana	cis-acting element involved in the abscisic acid responsiveness
ScSPL10	ABRE	ACGTG	461	5	-	Arabidopsis thaliana	cis-acting element involved in the abscisic acid responsiveness
ScSPL10	ABRE	GCAACGTGTC	703	9	+	Hordeum vulgare	cis-acting element involved in the abscisic acid responsiveness
ScSPL10	ABRE	ACGTG	861	5	+	Arabidopsis thaliana	cis-acting element involved in the abscisic acid responsiveness
ScSPL10	ABRE	TACGTGTC	1960	8	+	Oryza sativa	cis-acting element involved in the abscisic acid responsiveness
ScSPL10	ABRE	ACGTG	1961	5	+	Arabidopsis thaliana	cis-acting element involved in the abscisic acid responsiveness
ScSPL10	ABRE	ACGTG	1989	5	+	Arabidopsis thaliana	cis-acting element involved in the abscisic acid responsiveness
ScSPL11	AT~TATA-box	TATATA	559	6	+	Arabidopsis thaliana
ScSPL11	Unnamed__16	GCTGCCCGTC	1763	9	+	Zea mays
ScSPL11	MYC	CATGTG	448	6	-	Arabidopsis thaliana
ScSPL11	MYC	CATGTG	472	6	+	Arabidopsis thaliana
ScSPL11	MYC	CATGTG	626	6	+	Arabidopsis thaliana
ScSPL11	MYC	CATGTG	782	6	-	Arabidopsis thaliana
ScSPL11	MYC	CATTTG	1032	6	+	Arabidopsis thaliana
ScSPL11	A-box	CCGTCC	206	6	+	Petroselinum crispum	sequence conserved in alpha-amylase promoters
ScSPL11	A-box	CCGTCC	1446	6	-	Petroselinum crispum	sequence conserved in alpha-amylase promoters
ScSPL11	as-1	TGACG	1239	5	+	Arabidopsis thaliana
ScSPL11	as-1	TGACG	1562	5	+	Arabidopsis thaliana
ScSPL11	Unnamed__1	CGTGG	340	5	-	Zea mays
ScSPL11	Unnamed__1	CGTGG	1442	5	+	Zea mays
ScSPL11	Unnamed__1	CGTGG	1532	5	-	Zea mays
ScSPL11	Unnamed__1	CGTGG	1537	5	-	Zea mays
ScSPL11	dOCT	CACGGATC	1934	8	-	Zea mays
ScSPL11	TCCC-motif	TCTCCCT	1688	7	+	Spinacia oleracea	part of a light responsive element
ScSPL11	TCCC-motif	TCTCCCT	1963	7	-	Spinacia oleracea	part of a light responsive element
ScSPL11	AAGAA-motif	gGTAAAGAAA	942	9	-	Avena sativa
ScSPL11	AAGAA-motif	GAAAGAA	1484	7	-	Avena sativa
ScSPL11	Myb	TAACTG	1870	6	+	Arabidopsis thaliana
ScSPL11	Myb	CAACTG	1882	6	+	Arabidopsis thaliana
ScSPL11	AC-II	CCACCAACCCCC	195	11	+	Phaseolus vulgaris
ScSPL11	CGTCA-motif	CGTCA	1239	5	-	Hordeum vulgare	cis-acting regulatory element involved in the MeJA-responsiveness
ScSPL11	CGTCA-motif	CGTCA	1562	5	-	Hordeum vulgare	cis-acting regulatory element involved in the MeJA-responsiveness
ScSPL11	GT1-motif	GGTTAA	717	6	+	Arabidopsis thaliana	light responsive element
ScSPL11	GT1-motif	GGTTAA	835	6	+	Arabidopsis thaliana	light responsive element
ScSPL11	TGA-element	AACGAC	175	6	+	Brassica oleracea	auxin-responsive element
ScSPL11	ACE	GCGACGTACC	1166	10	+	Petroselinum crispum	cis-acting element involved in light responsiveness
ScSPL11	O2-site	GATGA(C/T)(A/G)TG(A/G)	1805	8	+	Zea mays	cis-acting regulatory element involved in zein metabolism regulation
ScSPL11	TGACG-motif	TGACG	1239	5	+	Hordeum vulgare	cis-acting regulatory element involved in the MeJA-responsiveness
ScSPL11	TGACG-motif	TGACG	1562	5	+	Hordeum vulgare	cis-acting regulatory element involved in the MeJA-responsiveness
ScSPL11	G-box	ACACGTGT	1091	8	-	Brassica napus	cis-acting regulatory element involved in light responsiveness
ScSPL11	G-box	CACGTG	1092	6	-	Arabidopsis thaliana	cis-acting regulatory element involved in light responsiveness
ScSPL11	MYB-like sequence	TAACCA	591	6	+	Arabidopsis thaliana
ScSPL11	Unnamed__4	CTCC	28	4	+	Petroselinum hortense
ScSPL11	Unnamed__4	CTCC	89	4	+	Petroselinum hortense
ScSPL11	Unnamed__4	CTCC	110	4	-	Petroselinum hortense
ScSPL11	Unnamed__4	CTCC	244	4	+	Petroselinum hortense
ScSPL11	Unnamed__4	CTCC	302	4	-	Petroselinum hortense
ScSPL11	Unnamed__4	CTCC	331	4	+	Petroselinum hortense
ScSPL11	Unnamed__4	CTCC	335	4	+	Petroselinum hortense
ScSPL11	Unnamed__4	CTCC	424	4	+	Petroselinum hortense
ScSPL11	Unnamed__4	CTCC	454	4	-	Petroselinum hortense
ScSPL11	Unnamed__4	CTCC	598	4	+	Petroselinum hortense
ScSPL11	Unnamed__4	CTCC	650	4	-	Petroselinum hortense
ScSPL11	Unnamed__4	CTCC	663	4	-	Petroselinum hortense
ScSPL11	Unnamed__4	CTCC	764	4	+	Petroselinum hortense
ScSPL11	Unnamed__4	CTCC	1131	4	-	Petroselinum hortense
ScSPL11	Unnamed__4	CTCC	1203	4	-	Petroselinum hortense
ScSPL11	Unnamed__4	CTCC	1510	4	+	Petroselinum hortense
ScSPL11	Unnamed__4	CTCC	1546	4	+	Petroselinum hortense
ScSPL11	Unnamed__4	CTCC	1625	4	+	Petroselinum hortense
ScSPL11	Unnamed__4	CTCC	1689	4	+	Petroselinum hortense
ScSPL11	Unnamed__4	CTCC	1733	4	+	Petroselinum hortense
ScSPL11	Unnamed__4	CTCC	1757	4	+	Petroselinum hortense
ScSPL11	Unnamed__4	CTCC	1781	4	+	Petroselinum hortense
ScSPL11	Unnamed__4	CTCC	1791	4	+	Petroselinum hortense
ScSPL11	Unnamed__4	CTCC	1888	4	+	Petroselinum hortense
ScSPL11	Unnamed__4	CTCC	1900	4	+	Petroselinum hortense
ScSPL11	Unnamed__4	CTCC	1917	4	+	Petroselinum hortense
ScSPL11	Unnamed__4	CTCC	1965	4	-	Petroselinum hortense
ScSPL11	Unnamed__4	CTCC	1981	4	-	Petroselinum hortense
ScSPL11	MBS	CAACTG	1882	6	+	Arabidopsis thaliana	MYB binding site involved in drought-inducibility
ScSPL11	MYB	CAACCA	549	6	+	Arabidopsis thaliana
ScSPL11	MYB	TAACCA	591	6	+	Arabidopsis thaliana
ScSPL11	AE-box	AGAAACTT	731	8	-	Arabidopsis thaliana	part of a module for light response
ScSPL11	TCA	TCATCTTCAT	316	9	+	Pisum sativum
ScSPL11	G-Box	CACGTG	1092	6	-	Pisum sativum	cis-acting regulatory element involved in light responsiveness
ScSPL11	ABRE	AACCCGG	714	7	-	Arabidopsis thaliana	cis-acting element involved in the abscisic acid responsiveness
ScSPL11	ABRE	CACGTG	1092	6	-	Arabidopsis thaliana	cis-acting element involved in the abscisic acid responsiveness
ScSPL11	ABRE	ACGTG	1093	5	+	Arabidopsis thaliana	cis-acting element involved in the abscisic acid responsiveness
ScSPL11	Unnamed__6	taTAAATATct	807	10	-	Zea mays
ScSPL11	STRE	AGGGG	167	5	+	Arabidopsis thaliana
ScSPL11	STRE	AGGGG	328	5	-	Arabidopsis thaliana
ScSPL11	STRE	AGGGG	401	5	+	Arabidopsis thaliana
ScSPL11	STRE	AGGGG	419	5	-	Arabidopsis thaliana
ScSPL11	STRE	AGGGG	1212	5	+	Arabidopsis thaliana
ScSPL11	STRE	AGGGG	1498	5	-	Arabidopsis thaliana
ScSPL11	STRE	AGGGG	1526	5	-	Arabidopsis thaliana
ScSPL11	STRE	AGGGG	1698	5	-	Arabidopsis thaliana
ScSPL11	box S	AGCCACC	1824	7	-	Arabidopsis thaliana
ScSPL11	CCAAT-box	CAACGG	295	6	+	Hordeum vulgare
ScSPL11	CCAAT-box	CAACGG	659	6	+	Hordeum vulgare
ScSPL11	CAAT-box	CAAT	310	4	-	Nicotiana glutinosa	common cis-acting element in promoter and enhancer regions
ScSPL11	CAAT-box	CAAAT	369	5	+	Pisum sativum	common cis-acting element in promoter and enhancer regions
ScSPL11	CAAT-box	CAAT	407	4	+	Nicotiana glutinosa	common cis-acting element in promoter and enhancer regions
ScSPL11	CAAT-box	CAAT	726	4	+	Nicotiana glutinosa	common cis-acting element in promoter and enhancer regions
ScSPL11	CAAT-box	CAAAT	890	5	+	Pisum sativum	common cis-acting element in promoter and enhancer regions
ScSPL11	CAAT-box	CAAAT	1033	5	-	Pisum sativum	common cis-acting element in promoter and enhancer regions
ScSPL11	CAAT-box	CAAAT	1070	5	-	Pisum sativum	common cis-acting element in promoter and enhancer regions
ScSPL11	CAAT-box	CAAT	1110	4	+	Nicotiana glutinosa	common cis-acting element in promoter and enhancer regions
ScSPL11	CAAT-box	CCAAT	1161	5	+	Arabidopsis thaliana	common cis-acting element in promoter and enhancer regions
ScSPL11	CAAT-box	CAAT	1162	4	+	Nicotiana glutinosa	common cis-acting element in promoter and enhancer regions
ScSPL11	CAAT-box	CCAAT	1514	5	+	Arabidopsis thaliana	common cis-acting element in promoter and enhancer regions
ScSPL11	CAAT-box	CAAT	1515	4	+	Nicotiana glutinosa	common cis-acting element in promoter and enhancer regions
ScSPL11	CAAT-box	CCAAT	1890	5	+	Arabidopsis thaliana	common cis-acting element in promoter and enhancer regions
ScSPL11	CAAT-box	CAAT	1891	4	+	Nicotiana glutinosa	common cis-acting element in promoter and enhancer regions
ScSPL11	CCGTCC-box	CCGTCC	206	6	+	Petroselinum hortense
ScSPL11	CCGTCC-box	CCGTCC	1446	6	-	Petroselinum hortense
ScSPL11	GATA-motif	GATAGGA	694	7	+	Arabidopsis thaliana	part of a light responsive element
ScSPL11	GATA-motif	AAGATAAGATT	956	10	+	Arabidopsis thaliana	part of a light responsive element
ScSPL11	TCT-motif	TCTTAC	954	6	-	Arabidopsis thaliana	part of a light responsive element
ScSPL11	MYB recognition site	CCGTTG	295	6	-	Arabidopsis thaliana
ScSPL11	MYB recognition site	CCGTTG	659	6	-	Arabidopsis thaliana
ScSPL11	CCGTCC motif	CCGTCC	206	6	+	Nicotiana tabacum
ScSPL11	CCGTCC motif	CCGTCC	1446	6	-	Nicotiana tabacum
ScSPL11	Sp1	GGGCGG	1423	6	-	Oryza sativa	light responsive element
ScSPL11	Sp1	GGGCGG	1471	6	-	Oryza sativa	light responsive element
ScSPL11	GC-motif	CCCCCG	298	6	-	Zea mays
ScSPL11	GC-motif	CCCCCG	1233	6	-	Zea mays
ScSPL11	GC-motif	CCCCCG	1474	6	+	Zea mays
ScSPL11	GC-motif	CCCCCG	1796	6	-	Zea mays
ScSPL11	TATA-box	TATACA	511	6	-	Helianthus annuus	core promoter element around -30 of transcription start
ScSPL11	TATA-box	TATA	513	4	+	Arabidopsis thaliana	core promoter element around -30 of transcription start
ScSPL11	TATA-box	ATTATA	557	6	+	Brassica napus	core promoter element around -30 of transcription start
ScSPL11	TATA-box	TATATAA	558	7	-	Arabidopsis thaliana	core promoter element around -30 of transcription start
ScSPL11	TATA-box	TATATA	559	6	+	Arabidopsis thaliana	core promoter element around -30 of transcription start
ScSPL11	TATA-box	TATA	561	4	+	Arabidopsis thaliana	core promoter element around -30 of transcription start
ScSPL11	TATA-box	taTATAAAtc	810	9	-	Arabidopsis thaliana	core promoter element around -30 of transcription start
ScSPL11	TATA-box	TATAAAT	811	7	-	Brassica juncea	core promoter element around -30 of transcription start
ScSPL11	TATA-box	TATAAA	812	6	-	Helianthus annuus	core promoter element around -30 of transcription start
ScSPL11	TATA-box	TATAA	813	5	-	Arabidopsis thaliana	core promoter element around -30 of transcription start
ScSPL11	TATA-box	TATA	814	4	+	Arabidopsis thaliana	core promoter element around -30 of transcription start
ScSPL11	TATA-box	TATA	827	4	+	Arabidopsis thaliana	core promoter element around -30 of transcription start
ScSPL11	TATA-box	TATA	1976	4	-	Arabidopsis thaliana	core promoter element around -30 of transcription start
ScSPL11	CAT-box	GCCACT	435	6	+	Arabidopsis thaliana	cis-acting regulatory element related to meristem expression
ScSPL11	CAT-box	GCCACT	1362	6	+	Arabidopsis thaliana	cis-acting regulatory element related to meristem expression
ScSPL12	TCCC-motif	TCTCCCT	1720	7	-	Spinacia oleracea	part of a light responsive element
ScSPL12	TCCC-motif	TCTCCCT	1774	7	-	Spinacia oleracea	part of a light responsive element
ScSPL12	TCCC-motif	TCTCCCT	1859	7	+	Spinacia oleracea	part of a light responsive element
ScSPL12	TCCC-motif	TCTCCCT	1876	7	+	Spinacia oleracea	part of a light responsive element
ScSPL12	AT-rich element	ATAGAAATCAA	838	10	+	Glycine max	binding site of AT-rich DNA binding protein (ATBP-1)
ScSPL12	ARE	AAACCA	961	6	+	Zea mays	cis-acting regulatory element essential for the anaerobic induction
ScSPL12	CGTCA-motif	CGTCA	6	5	+	Hordeum vulgare	cis-acting regulatory element involved in the MeJA-responsiveness
ScSPL12	CGTCA-motif	CGTCA	641	5	+	Hordeum vulgare	cis-acting regulatory element involved in the MeJA-responsiveness
ScSPL12	CGTCA-motif	CGTCA	1659	5	-	Hordeum vulgare	cis-acting regulatory element involved in the MeJA-responsiveness
ScSPL12	CGTCA-motif	CGTCA	1850	5	+	Hordeum vulgare	cis-acting regulatory element involved in the MeJA-responsiveness
ScSPL12	GT1-motif	GGTTAA	1106	6	-	Arabidopsis thaliana	light responsive element
ScSPL12	ACE	CTAACGTATT	398	9	+	Petroselinum crispum	cis-acting element involved in light responsiveness
ScSPL12	O2-site	GATGACATGG	145	9	-	Zea mays	cis-acting regulatory element involved in zein metabolism regulation
ScSPL12	O2-site	GTTGACGTGA	462	9	-	Zea mays	cis-acting regulatory element involved in zein metabolism regulation
ScSPL12	TGACG-motif	TGACG	6	5	-	Hordeum vulgare	cis-acting regulatory element involved in the MeJA-responsiveness
ScSPL12	TGACG-motif	TGACG	641	5	-	Hordeum vulgare	cis-acting regulatory element involved in the MeJA-responsiveness
ScSPL12	TGACG-motif	TGACG	1659	5	+	Hordeum vulgare	cis-acting regulatory element involved in the MeJA-responsiveness
ScSPL12	TGACG-motif	TGACG	1850	5	-	Hordeum vulgare	cis-acting regulatory element involved in the MeJA-responsiveness
ScSPL12	GARE-motif	TCTGTTG	362	7	-	Brassica oleracea	gibberellin-responsive element
ScSPL12	ABRE4	CACGTA	1532	6	+	Zea mays
ScSPL12	G-box	CACGTG	965	6	+	Arabidopsis thaliana	cis-acting regulatory element involved in light responsiveness
ScSPL12	G-box	TACGTG	1532	6	-	Arabidopsis thaliana	cis-acting regulatory element involved in light responsiveness
ScSPL12	G-box	CACGAC	1940	6	+	Zea mays	cis-acting regulatory element involved in light responsiveness
ScSPL12	Unnamed__4	CTCC	34	4	-	Petroselinum hortense
ScSPL12	Unnamed__4	CTCC	168	4	-	Petroselinum hortense
ScSPL12	Unnamed__4	CTCC	215	4	-	Petroselinum hortense
ScSPL12	Unnamed__4	CTCC	236	4	+	Petroselinum hortense
ScSPL12	Unnamed__4	CTCC	239	4	+	Petroselinum hortense
ScSPL12	Unnamed__4	CTCC	335	4	+	Petroselinum hortense
ScSPL12	Unnamed__4	CTCC	344	4	-	Petroselinum hortense
ScSPL12	Unnamed__4	CTCC	857	4	+	Petroselinum hortense
ScSPL12	Unnamed__4	CTCC	880	4	+	Petroselinum hortense
ScSPL12	Unnamed__4	CTCC	905	4	+	Petroselinum hortense
ScSPL12	Unnamed__4	CTCC	1073	4	-	Petroselinum hortense
ScSPL12	Unnamed__4	CTCC	1152	4	+	Petroselinum hortense
ScSPL12	Unnamed__4	CTCC	1162	4	-	Petroselinum hortense
ScSPL12	Unnamed__4	CTCC	1242	4	-	Petroselinum hortense
ScSPL12	Unnamed__4	CTCC	1250	4	-	Petroselinum hortense
ScSPL12	Unnamed__4	CTCC	1254	4	-	Petroselinum hortense
ScSPL12	Unnamed__4	CTCC	1412	4	-	Petroselinum hortense
ScSPL12	Unnamed__4	CTCC	1465	4	-	Petroselinum hortense
ScSPL12	Unnamed__4	CTCC	1542	4	+	Petroselinum hortense
ScSPL12	Unnamed__4	CTCC	1577	4	+	Petroselinum hortense
ScSPL12	Unnamed__4	CTCC	1641	4	+	Petroselinum hortense
ScSPL12	Unnamed__4	CTCC	1666	4	-	Petroselinum hortense
ScSPL12	Unnamed__4	CTCC	1722	4	-	Petroselinum hortense
ScSPL12	Unnamed__4	CTCC	1764	4	-	Petroselinum hortense
ScSPL12	Unnamed__4	CTCC	1768	4	-	Petroselinum hortense
ScSPL12	Unnamed__4	CTCC	1772	4	-	Petroselinum hortense
ScSPL12	Unnamed__4	CTCC	1776	4	-	Petroselinum hortense
ScSPL12	Unnamed__4	CTCC	1860	4	+	Petroselinum hortense
ScSPL12	Unnamed__4	CTCC	1877	4	+	Petroselinum hortense
ScSPL12	Unnamed__4	CTCC	1890	4	-	Petroselinum hortense
ScSPL12	Unnamed__4	CTCC	1895	4	-	Petroselinum hortense
ScSPL12	Unnamed__4	CTCC	1937	4	+	Petroselinum hortense
ScSPL12	DRE core	GCCGAC	1982	6	+	Arabidopsis thaliana
ScSPL12	Myc	TCTCTTA	381	7	-	Arabidopsis thaliana
ScSPL12	AT~TATA-box	TATATA	373	6	+	Arabidopsis thaliana
ScSPL12	MYC	CATTTG	138	6	-	Arabidopsis thaliana
ScSPL12	MYC	CAATTG	536	6	+	Arabidopsis thaliana
ScSPL12	MYC	CATTTG	743	6	-	Arabidopsis thaliana
ScSPL12	MYC	CAATTG	849	6	+	Arabidopsis thaliana
ScSPL12	W box	TTGACC	81	6	-	Arabidopsis thaliana
ScSPL12	as-1	TGACG	6	5	-	Arabidopsis thaliana
ScSPL12	as-1	TGACG	641	5	-	Arabidopsis thaliana
ScSPL12	as-1	TGACG	1659	5	+	Arabidopsis thaliana
ScSPL12	as-1	TGACG	1850	5	-	Arabidopsis thaliana
ScSPL12	Unnamed__1	CGTGG	964	5	-	Zea mays
ScSPL12	Unnamed__1	CGTGG	1531	5	-	Zea mays
ScSPL12	Unnamed__1	CGTGG	1592	5	-	Zea mays
ScSPL12	Unnamed__1	CGTGG	1599	5	-	Zea mays
ScSPL12	Unnamed__1	CGTGG	1939	5	-	Zea mays
ScSPL12	Unnamed__1	CGTGG	1966	5	-	Zea mays
ScSPL12	LTR	CCGAAA	1154	6	+	Hordeum vulgare	cis-acting element involved in low-temperature responsiveness
ScSPL12	GATA-motif	GATAGGG	1644	7	-	Pisum sativum	part of a light responsive element
ScSPL12	Box 4	ATTAAT	1186	6	-	Petroselinum crispum	part of a conserved DNA module involved in light responsiveness
ScSPL12	ERE	ATTTTAAA	816	8	+	Nicotiana glutinos
ScSPL12	ABRE3a	TACGTG	1532	6	-	Zea mays
ScSPL12	Myb-binding site	CAACAG	362	6	+	Nicotiana tabacum
ScSPL12	MYB recognition site	CCGTTG	275	6	+	Arabidopsis thaliana
ScSPL12	MYB recognition site	CCGTTG	1747	6	-	Arabidopsis thaliana
ScSPL12	Sp1	GGGCGG	998	6	+	Oryza sativa	light responsive element
ScSPL12	Sp1	GGGCGG	1580	6	-	Oryza sativa	light responsive element
ScSPL12	TATA-box	TATATA	373	6	+	Arabidopsis thaliana	core promoter element around -30 of transcription start
ScSPL12	TATA-box	TATA	375	4	+	Arabidopsis thaliana	core promoter element around -30 of transcription start
ScSPL12	TATA-box	TATAA	548	5	-	Arabidopsis thaliana	core promoter element around -30 of transcription start
ScSPL12	TATA-box	TATA	549	4	+	Arabidopsis thaliana	core promoter element around -30 of transcription start
ScSPL12	TATA-box	TACAAAA	564	7	+	Oryza sativa	core promoter element around -30 of transcription start
ScSPL12	TATA-box	ATATAA	582	6	+	Brassica oleracea	core promoter element around -30 of transcription start
ScSPL12	TATA-box	TATA	583	4	+	Arabidopsis thaliana	core promoter element around -30 of transcription start
ScSPL12	TATA-box	TATAAGAA	614	8	-	Zea mays	core promoter element around -30 of transcription start
ScSPL12	TATA-box	TATAA	617	5	-	Arabidopsis thaliana	core promoter element around -30 of transcription start
ScSPL12	TATA-box	TATA	618	4	+	Arabidopsis thaliana	core promoter element around -30 of transcription start
ScSPL12	TATA-box	TACAAAA	1562	7	+	Oryza sativa	core promoter element around -30 of transcription start
ScSPL12	TATA-box	TATA	1699	4	-	Arabidopsis thaliana	core promoter element around -30 of transcription start
ScSPL12	GC-motif	CCCCCG	1843	6	+	Zea mays
ScSPL12	WRE3	CCACCT	428	6	+	Pisum sativum
ScSPL12	WRE3	CCACCT	1933	6	+	Pisum sativum
ScSPL12	CAT-box	GCCACT	1167	6	+	Arabidopsis thaliana	cis-acting regulatory element related to meristem expression
ScSPL12	CAT-box	GCCACT	1205	6	+	Arabidopsis thaliana	cis-acting regulatory element related to meristem expression
ScSPL12	CARE	CAACTCAC	195	8	-	Oryza sativa
ScSPL12	MYB	CAACAG	362	6	+	Arabidopsis thaliana
ScSPL12	MYB	CAACCA	507	6	+	Arabidopsis thaliana
ScSPL12	RY-element	CATGCATG	479	8	+	Helianthus annuus
ScSPL12	RY-element	CATGCATG	511	8	+	Helianthus annuus
ScSPL12	AE-box	AGAAACAA	357	8	+	Arabidopsis thaliana	part of a module for light response
ScSPL12	G-Box	CACGTG	965	6	+	Pisum sativum	cis-acting regulatory element involved in light responsiveness
ScSPL12	ABRE	CACGTG	965	6	+	Arabidopsis thaliana	cis-acting element involved in the abscisic acid responsiveness
ScSPL12	ABRE	ACGTG	966	5	+	Arabidopsis thaliana	cis-acting element involved in the abscisic acid responsiveness
ScSPL12	ABRE	GCCGCGTGGC	1124	9	-	Oryza sativa	cis-acting element involved in the abscisic acid responsiveness
ScSPL12	ABRE	ACGTG	1532	5	-	Arabidopsis thaliana	cis-acting element involved in the abscisic acid responsiveness
ScSPL12	STRE	AGGGG	241	5	-	Arabidopsis thaliana
ScSPL12	STRE	AGGGG	1244	5	+	Arabidopsis thaliana
ScSPL12	STRE	AGGGG	1509	5	+	Arabidopsis thaliana
ScSPL12	STRE	AGGGG	1574	5	-	Arabidopsis thaliana
ScSPL12	STRE	AGGGG	1643	5	-	Arabidopsis thaliana
ScSPL12	STRE	AGGGG	1899	5	+	Arabidopsis thaliana
ScSPL12	P-box	CCTTTTG	910	7	-	Oryza sativa	gibberellin-responsive element
ScSPL12	P-box	CCTTTTG	1028	7	-	Oryza sativa	gibberellin-responsive element
ScSPL12	P-box	CCTTTTG	1675	7	-	Oryza sativa	gibberellin-responsive element
ScSPL12	box S	AGCCACC	19	7	-	Arabidopsis thaliana
ScSPL12	box S	AGCCACC	1931	7	+	Arabidopsis thaliana
ScSPL12	CCAAT-box	CAACGG	275	6	-	Hordeum vulgare
ScSPL12	CCAAT-box	CAACGG	1747	6	+	Hordeum vulgare
ScSPL12	CAAT-box	CCAAT	69	5	+	Arabidopsis thaliana	common cis-acting element in promoter and enhancer regions
ScSPL12	CAAT-box	CAAT	70	4	+	Nicotiana glutinosa	common cis-acting element in promoter and enhancer regions
ScSPL12	CAAT-box	CCAAT	99	5	-	Arabidopsis thaliana	common cis-acting element in promoter and enhancer regions
ScSPL12	CAAT-box	CAAAT	138	5	+	Pisum sativum	common cis-acting element in promoter and enhancer regions
ScSPL12	CAAT-box	CAAT	221	4	+	Nicotiana glutinosa	common cis-acting element in promoter and enhancer regions
ScSPL12	CAAT-box	CAAT	232	4	-	Nicotiana glutinosa	common cis-acting element in promoter and enhancer regions
ScSPL12	CAAT-box	CAAAT	248	5	-	Pisum sativum	common cis-acting element in promoter and enhancer regions
ScSPL12	CAAT-box	CAAT	255	4	-	Nicotiana glutinosa	common cis-acting element in promoter and enhancer regions
ScSPL12	CAAT-box	CAAT	282	4	-	Nicotiana glutinosa	common cis-acting element in promoter and enhancer regions
ScSPL12	CAAT-box	CAAT	536	4	+	Nicotiana glutinosa	common cis-acting element in promoter and enhancer regions
ScSPL12	CAAT-box	CAAT	538	4	-	Nicotiana glutinosa	common cis-acting element in promoter and enhancer regions
ScSPL12	CAAT-box	CAAT	555	4	+	Nicotiana glutinosa	common cis-acting element in promoter and enhancer regions
ScSPL12	CAAT-box	CAAAT	579	5	+	Pisum sativum	common cis-acting element in promoter and enhancer regions
ScSPL12	CAAT-box	CAAAT	632	5	+	Pisum sativum	common cis-acting element in promoter and enhancer regions
ScSPL12	CAAT-box	CAAT	644	4	+	Nicotiana glutinosa	common cis-acting element in promoter and enhancer regions
ScSPL12	CAAT-box	CAAT	648	4	+	Nicotiana glutinosa	common cis-acting element in promoter and enhancer regions
ScSPL12	CAAT-box	CAAT	701	4	+	Nicotiana glutinosa	common cis-acting element in promoter and enhancer regions
ScSPL12	CAAT-box	CAAAT	743	5	+	Pisum sativum	common cis-acting element in promoter and enhancer regions
ScSPL12	CAAT-box	TGCCAAC	756	7	+	Petunia hybrida	common cis-acting element in promoter and enhancer regions
ScSPL12	CAAT-box	CAAT	849	4	+	Nicotiana glutinosa	common cis-acting element in promoter and enhancer regions
ScSPL12	CAAT-box	CAAT	851	4	-	Nicotiana glutinosa	common cis-acting element in promoter and enhancer regions
ScSPL12	CAAT-box	CAAT	917	4	-	Nicotiana glutinosa	common cis-acting element in promoter and enhancer regions
ScSPL12	CAAT-box	CCAAT	1197	5	+	Arabidopsis thaliana	common cis-acting element in promoter and enhancer regions
ScSPL12	CAAT-box	CAAT	1198	4	+	Nicotiana glutinosa	common cis-acting element in promoter and enhancer regions
ScSPL12	CAAT-box	CAAAT	1454	5	-	Pisum sativum	common cis-acting element in promoter and enhancer regions
ScSPL12	CAAT-box	CCAAT	1482	5	+	Arabidopsis thaliana	common cis-acting element in promoter and enhancer regions
ScSPL12	CAAT-box	CAAT	1483	4	+	Nicotiana glutinosa	common cis-acting element in promoter and enhancer regions
ScSPL12	CAAT-box	CAAT	1627	4	+	Nicotiana glutinosa	common cis-acting element in promoter and enhancer regions
ScSPL12	CAAT-box	CAAAT	1792	5	-	Pisum sativum	common cis-acting element in promoter and enhancer regions
ScSPL12	Unnamed__2	CCCCGG	1544	6	+	Zea mays
ScSPL13	Box 4	ATTAAT	1207	6	-	Petroselinum crispum	part of a conserved DNA module involved in light responsiveness
ScSPL13	GATA-motif	GATAGGG	1648	7	-	Pisum sativum	part of a light responsive element
ScSPL13	TCT-motif	TCTTAC	361	6	+	Arabidopsis thaliana	part of a light responsive element
ScSPL13	Myb-binding site	CAACAG	372	6	+	Nicotiana tabacum
ScSPL13	ABRE3a	TACGTG	1536	6	-	Zea mays
ScSPL13	MYB recognition site	CCGTTG	286	6	+	Arabidopsis thaliana
ScSPL13	MYB recognition site	CCGTTG	1751	6	-	Arabidopsis thaliana
ScSPL13	GC-motif	CCCCCG	1847	6	+	Zea mays
ScSPL13	TATA-box	TATATA	383	6	+	Arabidopsis thaliana	core promoter element around -30 of transcription start
ScSPL13	TATA-box	TATA	385	4	+	Arabidopsis thaliana	core promoter element around -30 of transcription start
ScSPL13	TATA-box	TATAA	558	5	-	Arabidopsis thaliana	core promoter element around -30 of transcription start
ScSPL13	TATA-box	TATA	559	4	+	Arabidopsis thaliana	core promoter element around -30 of transcription start
ScSPL13	TATA-box	TACAAAA	573	7	+	Oryza sativa	core promoter element around -30 of transcription start
ScSPL13	TATA-box	ATATAA	591	6	+	Brassica oleracea	core promoter element around -30 of transcription start
ScSPL13	TATA-box	TATA	592	4	+	Arabidopsis thaliana	core promoter element around -30 of transcription start
ScSPL13	TATA-box	TATAAGAA	622	8	-	Zea mays	core promoter element around -30 of transcription start
ScSPL13	TATA-box	TATAA	625	5	-	Arabidopsis thaliana	core promoter element around -30 of transcription start
ScSPL13	TATA-box	TATA	626	4	+	Arabidopsis thaliana	core promoter element around -30 of transcription start
ScSPL13	TATA-box	TACAAAA	1566	7	+	Oryza sativa	core promoter element around -30 of transcription start
ScSPL13	TATA-box	TATA	1703	4	-	Arabidopsis thaliana	core promoter element around -30 of transcription start
ScSPL13	Sp1	GGGCGG	1005	6	+	Oryza sativa	light responsive element
ScSPL13	Sp1	GGGCGG	1584	6	-	Oryza sativa	light responsive element
ScSPL13	WRE3	CCACCT	438	6	+	Pisum sativum
ScSPL13	WRE3	CCACCT	1937	6	+	Pisum sativum
ScSPL13	CAT-box	GCCACT	1188	6	+	Arabidopsis thaliana	cis-acting regulatory element related to meristem expression
ScSPL13	CAT-box	GCCACT	1226	6	+	Arabidopsis thaliana	cis-acting regulatory element related to meristem expression
ScSPL13	MYB	CAACAG	372	6	+	Arabidopsis thaliana
ScSPL13	MYB	CAACCA	517	6	+	Arabidopsis thaliana
ScSPL13	MYB	CAACCA	1914	6	+	Arabidopsis thaliana
ScSPL13	G-Box	CACGTG	972	6	+	Pisum sativum	cis-acting regulatory element involved in light responsiveness
ScSPL13	AE-box	AGAAACAA	367	8	+	Arabidopsis thaliana	part of a module for light response
ScSPL13	RY-element	CATGCATG	489	8	+	Helianthus annuus
ScSPL13	RY-element	CATGCATG	521	8	+	Helianthus annuus
ScSPL13	STRE	AGGGG	252	5	-	Arabidopsis thaliana
ScSPL13	STRE	AGGGG	1265	5	+	Arabidopsis thaliana
ScSPL13	STRE	AGGGG	1513	5	+	Arabidopsis thaliana
ScSPL13	STRE	AGGGG	1578	5	-	Arabidopsis thaliana
ScSPL13	STRE	AGGGG	1647	5	-	Arabidopsis thaliana
ScSPL13	STRE	AGGGG	1874	5	-	Arabidopsis thaliana
ScSPL13	STRE	AGGGG	1903	5	+	Arabidopsis thaliana
ScSPL13	ABRE	CACGTG	972	6	+	Arabidopsis thaliana	cis-acting element involved in the abscisic acid responsiveness
ScSPL13	ABRE	ACGTG	973	5	+	Arabidopsis thaliana	cis-acting element involved in the abscisic acid responsiveness
ScSPL13	ABRE	GCCGCGTGGC	1145	9	-	Oryza sativa	cis-acting element involved in the abscisic acid responsiveness
ScSPL13	ABRE	ACGTG	1536	5	-	Arabidopsis thaliana	cis-acting element involved in the abscisic acid responsiveness
ScSPL13	P-box	CCTTTTG	917	7	-	Oryza sativa	gibberellin-responsive element
ScSPL13	P-box	CCTTTTG	1035	7	-	Oryza sativa	gibberellin-responsive element
ScSPL13	P-box	CCTTTTG	1679	7	-	Oryza sativa	gibberellin-responsive element
ScSPL13	box S	AGCCACC	30	7	-	Arabidopsis thaliana
ScSPL13	box S	AGCCACC	1935	7	+	Arabidopsis thaliana
ScSPL13	CAAT-box	CCAAT	80	5	+	Arabidopsis thaliana	common cis-acting element in promoter and enhancer regions
ScSPL13	CAAT-box	CAAT	81	4	+	Nicotiana glutinosa	common cis-acting element in promoter and enhancer regions
ScSPL13	CAAT-box	CCAAT	110	5	-	Arabidopsis thaliana	common cis-acting element in promoter and enhancer regions
ScSPL13	CAAT-box	CAAAT	149	5	+	Pisum sativum	common cis-acting element in promoter and enhancer regions
ScSPL13	CAAT-box	CAAT	232	4	+	Nicotiana glutinosa	common cis-acting element in promoter and enhancer regions
ScSPL13	CAAT-box	CAAT	243	4	-	Nicotiana glutinosa	common cis-acting element in promoter and enhancer regions
ScSPL13	CAAT-box	CAAT	257	4	+	Nicotiana glutinosa	common cis-acting element in promoter and enhancer regions
ScSPL13	CAAT-box	CAAAT	259	5	-	Pisum sativum	common cis-acting element in promoter and enhancer regions
ScSPL13	CAAT-box	CAAT	266	4	-	Nicotiana glutinosa	common cis-acting element in promoter and enhancer regions
ScSPL13	CAAT-box	CAAT	293	4	-	Nicotiana glutinosa	common cis-acting element in promoter and enhancer regions
ScSPL13	CAAT-box	CAAT	546	4	+	Nicotiana glutinosa	common cis-acting element in promoter and enhancer regions
ScSPL13	CAAT-box	CAAT	548	4	-	Nicotiana glutinosa	common cis-acting element in promoter and enhancer regions
ScSPL13	CAAT-box	CAAT	565	4	+	Nicotiana glutinosa	common cis-acting element in promoter and enhancer regions
ScSPL13	CAAT-box	CAAAT	588	5	+	Pisum sativum	common cis-acting element in promoter and enhancer regions
ScSPL13	CAAT-box	CAAAT	640	5	+	Pisum sativum	common cis-acting element in promoter and enhancer regions
ScSPL13	CAAT-box	CAAT	652	4	+	Nicotiana glutinosa	common cis-acting element in promoter and enhancer regions
ScSPL13	CAAT-box	CAAT	656	4	+	Nicotiana glutinosa	common cis-acting element in promoter and enhancer regions
ScSPL13	CAAT-box	CAAT	709	4	+	Nicotiana glutinosa	common cis-acting element in promoter and enhancer regions
ScSPL13	CAAT-box	CAAAT	751	5	+	Pisum sativum	common cis-acting element in promoter and enhancer regions
ScSPL13	CAAT-box	TGCCAAC	764	7	+	Petunia hybrida	common cis-acting element in promoter and enhancer regions
ScSPL13	CAAT-box	CAAT	853	4	+	Nicotiana glutinosa	common cis-acting element in promoter and enhancer regions
ScSPL13	CAAT-box	CAAT	858	4	-	Nicotiana glutinosa	common cis-acting element in promoter and enhancer regions
ScSPL13	CAAT-box	CAAT	924	4	-	Nicotiana glutinosa	common cis-acting element in promoter and enhancer regions
ScSPL13	CAAT-box	CCAAT	1218	5	+	Arabidopsis thaliana	common cis-acting element in promoter and enhancer regions
ScSPL13	CAAT-box	CAAT	1219	4	+	Nicotiana glutinosa	common cis-acting element in promoter and enhancer regions
ScSPL13	CAAT-box	CAAAT	1458	5	-	Pisum sativum	common cis-acting element in promoter and enhancer regions
ScSPL13	CAAT-box	CCAAT	1486	5	+	Arabidopsis thaliana	common cis-acting element in promoter and enhancer regions
ScSPL13	CAAT-box	CAAT	1487	4	+	Nicotiana glutinosa	common cis-acting element in promoter and enhancer regions
ScSPL13	CAAT-box	CAAT	1631	4	+	Nicotiana glutinosa	common cis-acting element in promoter and enhancer regions
ScSPL13	CAAT-box	CAAAT	1796	5	-	Pisum sativum	common cis-acting element in promoter and enhancer regions
ScSPL13	CCAAT-box	CAACGG	286	6	-	Hordeum vulgare
ScSPL13	CCAAT-box	CAACGG	1751	6	+	Hordeum vulgare
ScSPL13	Unnamed__2	CCCCGG	1548	6	+	Zea mays
ScSPL13	TCCC-motif	TCTCCCT	1724	7	-	Spinacia oleracea	part of a light responsive element
ScSPL13	TCCC-motif	TCTCCCT	1778	7	-	Spinacia oleracea	part of a light responsive element
ScSPL13	TCCC-motif	TCTCCCT	1863	7	+	Spinacia oleracea	part of a light responsive element
ScSPL13	TCCC-motif	TCTCCCT	1880	7	+	Spinacia oleracea	part of a light responsive element
ScSPL13	CGTCA-motif	CGTCA	649	5	+	Hordeum vulgare	cis-acting regulatory element involved in the MeJA-responsiveness
ScSPL13	CGTCA-motif	CGTCA	1663	5	-	Hordeum vulgare	cis-acting regulatory element involved in the MeJA-responsiveness
ScSPL13	CGTCA-motif	CGTCA	1854	5	+	Hordeum vulgare	cis-acting regulatory element involved in the MeJA-responsiveness
ScSPL13	AT-rich element	ATAGAAATCAA	845	10	+	Glycine max	binding site of AT-rich DNA binding protein (ATBP-1)
ScSPL13	GT1-motif	GGTTAA	1127	6	-	Arabidopsis thaliana	light responsive element
ScSPL13	ACE	CTAACGTATT	408	9	+	Petroselinum crispum	cis-acting element involved in light responsiveness
ScSPL13	O2-site	GATGACATGG	156	9	-	Zea mays	cis-acting regulatory element involved in zein metabolism regulation
ScSPL13	O2-site	GTTGACGTGA	472	9	-	Zea mays	cis-acting regulatory element involved in zein metabolism regulation
ScSPL13	GARE-motif	TCTGTTG	372	7	-	Brassica oleracea	gibberellin-responsive element
ScSPL13	TGACG-motif	TGACG	649	5	-	Hordeum vulgare	cis-acting regulatory element involved in the MeJA-responsiveness
ScSPL13	TGACG-motif	TGACG	1663	5	+	Hordeum vulgare	cis-acting regulatory element involved in the MeJA-responsiveness
ScSPL13	TGACG-motif	TGACG	1854	5	-	Hordeum vulgare	cis-acting regulatory element involved in the MeJA-responsiveness
ScSPL13	G-box	GCCACGTGGA	970	9	+	Arabidopsis thaliana	cis-acting regulatory element involved in light responsiveness
ScSPL13	G-box	CACGTG	972	6	+	Arabidopsis thaliana	cis-acting regulatory element involved in light responsiveness
ScSPL13	G-box	TACGTG	1536	6	-	Arabidopsis thaliana	cis-acting regulatory element involved in light responsiveness
ScSPL13	G-box	CACGAC	1944	6	+	Zea mays	cis-acting regulatory element involved in light responsiveness
ScSPL13	ABRE4	CACGTA	1536	6	+	Zea mays
ScSPL13	DRE core	GCCGAC	1982	6	+	Arabidopsis thaliana
ScSPL13	Unnamed__4	CTCC	45	4	-	Petroselinum hortense
ScSPL13	Unnamed__4	CTCC	179	4	-	Petroselinum hortense
ScSPL13	Unnamed__4	CTCC	226	4	-	Petroselinum hortense
ScSPL13	Unnamed__4	CTCC	247	4	+	Petroselinum hortense
ScSPL13	Unnamed__4	CTCC	250	4	+	Petroselinum hortense
ScSPL13	Unnamed__4	CTCC	354	4	-	Petroselinum hortense
ScSPL13	Unnamed__4	CTCC	864	4	+	Petroselinum hortense
ScSPL13	Unnamed__4	CTCC	887	4	+	Petroselinum hortense
ScSPL13	Unnamed__4	CTCC	912	4	+	Petroselinum hortense
ScSPL13	Unnamed__4	CTCC	1093	4	-	Petroselinum hortense
ScSPL13	Unnamed__4	CTCC	1173	4	+	Petroselinum hortense
ScSPL13	Unnamed__4	CTCC	1183	4	-	Petroselinum hortense
ScSPL13	Unnamed__4	CTCC	1263	4	-	Petroselinum hortense
ScSPL13	Unnamed__4	CTCC	1270	4	-	Petroselinum hortense
ScSPL13	Unnamed__4	CTCC	1274	4	-	Petroselinum hortense
ScSPL13	Unnamed__4	CTCC	1416	4	-	Petroselinum hortense
ScSPL13	Unnamed__4	CTCC	1469	4	-	Petroselinum hortense
ScSPL13	Unnamed__4	CTCC	1546	4	+	Petroselinum hortense
ScSPL13	Unnamed__4	CTCC	1581	4	+	Petroselinum hortense
ScSPL13	Unnamed__4	CTCC	1645	4	+	Petroselinum hortense
ScSPL13	Unnamed__4	CTCC	1670	4	-	Petroselinum hortense
ScSPL13	Unnamed__4	CTCC	1726	4	-	Petroselinum hortense
ScSPL13	Unnamed__4	CTCC	1768	4	-	Petroselinum hortense
ScSPL13	Unnamed__4	CTCC	1772	4	-	Petroselinum hortense
ScSPL13	Unnamed__4	CTCC	1776	4	-	Petroselinum hortense
ScSPL13	Unnamed__4	CTCC	1780	4	-	Petroselinum hortense
ScSPL13	Unnamed__4	CTCC	1864	4	+	Petroselinum hortense
ScSPL13	Unnamed__4	CTCC	1881	4	+	Petroselinum hortense
ScSPL13	Unnamed__4	CTCC	1894	4	-	Petroselinum hortense
ScSPL13	Unnamed__4	CTCC	1899	4	-	Petroselinum hortense
ScSPL13	Unnamed__4	CTCC	1941	4	+	Petroselinum hortense
ScSPL13	Myc	TCTCTTA	391	7	-	Arabidopsis thaliana
ScSPL13	HD-Zip 1	CAAT(A/T)ATTG	853	8	+	Arabidopsis thaliana	element involved in differentiation of the palisade mesophyll cells
ScSPL13	AT~TATA-box	TATATA	383	6	+	Arabidopsis thaliana
ScSPL13	MYC	CATTTG	149	6	-	Arabidopsis thaliana
ScSPL13	MYC	CAATTG	546	6	+	Arabidopsis thaliana
ScSPL13	MYC	CATTTG	751	6	-	Arabidopsis thaliana
ScSPL13	W box	TTGACC	92	6	-	Arabidopsis thaliana
ScSPL13	Unnamed__1	CGTGG	971	5	-	Zea mays
ScSPL13	Unnamed__1	CGTGG	1535	5	-	Zea mays
ScSPL13	Unnamed__1	CGTGG	1596	5	-	Zea mays
ScSPL13	Unnamed__1	CGTGG	1603	5	-	Zea mays
ScSPL13	Unnamed__1	CGTGG	1943	5	-	Zea mays
ScSPL13	Unnamed__1	CGTGG	1966	5	-	Zea mays
ScSPL13	as-1	TGACG	649	5	-	Arabidopsis thaliana
ScSPL13	as-1	TGACG	1663	5	+	Arabidopsis thaliana
ScSPL13	as-1	TGACG	1854	5	-	Arabidopsis thaliana
ScSPL13	LTR	CCGAAA	1175	6	+	Hordeum vulgare	cis-acting element involved in low-temperature responsiveness
ScSPL14	TC-rich repeats	GTTTTCTTAC	1952	9	+	Nicotiana tabacum	cis-acting element involved in defense and stress responsiveness
ScSPL14	MYC	CATGTG	407	6	-	Arabidopsis thaliana
ScSPL14	MYC	CAATTG	497	6	+	Arabidopsis thaliana
ScSPL14	MYC	CATGTG	614	6	-	Arabidopsis thaliana
ScSPL14	MYC	CATGTG	637	6	+	Arabidopsis thaliana
ScSPL14	MYC	CATGTG	745	6	+	Arabidopsis thaliana
ScSPL14	MYC	CATGTG	801	6	-	Arabidopsis thaliana
ScSPL14	MYC	CATGTG	803	6	+	Arabidopsis thaliana
ScSPL14	A-box	CCGTCC	1525	6	+	Petroselinum crispum	sequence conserved in alpha-amylase promoters
ScSPL14	W box	TTGACC	66	6	+	Arabidopsis thaliana
ScSPL14	W box	TTGACC	115	6	+	Arabidopsis thaliana
ScSPL14	W box	TTGACC	225	6	+	Arabidopsis thaliana
ScSPL14	as-1	TGACG	399	5	+	Arabidopsis thaliana
ScSPL14	as-1	TGACG	1008	5	+	Arabidopsis thaliana
ScSPL14	as-1	TGACG	1076	5	-	Arabidopsis thaliana
ScSPL14	Unnamed__1	CGTGG	37	5	+	Zea mays
ScSPL14	Unnamed__1	CGTGG	463	5	+	Zea mays
ScSPL14	Unnamed__1	CGTGG	1346	5	-	Zea mays
ScSPL14	Unnamed__1	CGTGG	1538	5	-	Zea mays
ScSPL14	TCCC-motif	TCTCCCT	1884	7	+	Spinacia oleracea	part of a light responsive element
ScSPL14	AAGAA-motif	GAAAGAA	763	7	+	Avena sativa
ScSPL14	AAGAA-motif	GAAAGAA	1955	7	-	Avena sativa
ScSPL14	Myb	TAACTG	395	6	+	Arabidopsis thaliana
ScSPL14	CGTCA-motif	CGTCA	399	5	-	Hordeum vulgare	cis-acting regulatory element involved in the MeJA-responsiveness
ScSPL14	CGTCA-motif	CGTCA	1008	5	-	Hordeum vulgare	cis-acting regulatory element involved in the MeJA-responsiveness
ScSPL14	CGTCA-motif	CGTCA	1076	5	+	Hordeum vulgare	cis-acting regulatory element involved in the MeJA-responsiveness
ScSPL14	ARE	AAACCA	935	6	+	Zea mays	cis-acting regulatory element essential for the anaerobic induction
ScSPL14	ARE	AAACCA	1300	6	-	Zea mays	cis-acting regulatory element essential for the anaerobic induction
ScSPL14	TGA-element	AACGAC	709	6	-	Brassica oleracea	auxin-responsive element
ScSPL14	TGA-element	AACGAC	1154	6	+	Brassica oleracea	auxin-responsive element
ScSPL14	O2-site	GTTGACGTGA	643	9	+	Zea mays	cis-acting regulatory element involved in zein metabolism regulation
ScSPL14	O2-site	GATGATGTGG	742	9	+	Zea mays	cis-acting regulatory element involved in zein metabolism regulation
ScSPL14	TGACG-motif	TGACG	399	5	+	Hordeum vulgare	cis-acting regulatory element involved in the MeJA-responsiveness
ScSPL14	TGACG-motif	TGACG	1008	5	+	Hordeum vulgare	cis-acting regulatory element involved in the MeJA-responsiveness
ScSPL14	TGACG-motif	TGACG	1076	5	-	Hordeum vulgare	cis-acting regulatory element involved in the MeJA-responsiveness
ScSPL14	G-box	CACGTG	29	6	+	Arabidopsis thaliana	cis-acting regulatory element involved in light responsiveness
ScSPL14	G-box	CACGTC	646	6	-	Zea mays	cis-acting regulatory element involved in light responsiveness
ScSPL14	G-box	CACGTG	943	6	+	Arabidopsis thaliana	cis-acting regulatory element involved in light responsiveness
ScSPL14	Unnamed__4	CTCC	594	4	-	Petroselinum hortense
ScSPL14	Unnamed__4	CTCC	717	4	-	Petroselinum hortense
ScSPL14	Unnamed__4	CTCC	963	4	+	Petroselinum hortense
ScSPL14	Unnamed__4	CTCC	1016	4	-	Petroselinum hortense
ScSPL14	Unnamed__4	CTCC	1340	4	-	Petroselinum hortense
ScSPL14	Unnamed__4	CTCC	1351	4	-	Petroselinum hortense
ScSPL14	Unnamed__4	CTCC	1403	4	+	Petroselinum hortense
ScSPL14	Unnamed__4	CTCC	1407	4	+	Petroselinum hortense
ScSPL14	Unnamed__4	CTCC	1502	4	-	Petroselinum hortense
ScSPL14	Unnamed__4	CTCC	1535	4	+	Petroselinum hortense
ScSPL14	Unnamed__4	CTCC	1579	4	+	Petroselinum hortense
ScSPL14	Unnamed__4	CTCC	1582	4	+	Petroselinum hortense
ScSPL14	Unnamed__4	CTCC	1587	4	+	Petroselinum hortense
ScSPL14	Unnamed__4	CTCC	1709	4	-	Petroselinum hortense
ScSPL14	Unnamed__4	CTCC	1731	4	-	Petroselinum hortense
ScSPL14	Unnamed__4	CTCC	1745	4	-	Petroselinum hortense
ScSPL14	Unnamed__4	CTCC	1828	4	+	Petroselinum hortense
ScSPL14	Unnamed__4	CTCC	1832	4	+	Petroselinum hortense
ScSPL14	Unnamed__4	CTCC	1859	4	+	Petroselinum hortense
ScSPL14	Unnamed__4	CTCC	1885	4	+	Petroselinum hortense
ScSPL14	Unnamed__4	CTCC	1906	4	-	Petroselinum hortense
ScSPL14	Unnamed__4	CTCC	1928	4	+	Petroselinum hortense
ScSPL14	Unnamed__4	CTCC	1974	4	-	Petroselinum hortense
ScSPL14	Unnamed__4	CTCC	1977	4	-	Petroselinum hortense
ScSPL14	DRE core	GCCGAC	1456	6	-	Arabidopsis thaliana
ScSPL14	I-box	gGATAAGGTG	717	9	+	Zea mays	part of a light responsive element
ScSPL14	CARE	CAACTCAC	560	8	-	Oryza sativa
ScSPL14	CARE	CAACTCCC	1015	8	-	Oryza sativa
ScSPL14	MYB	CAACCA	566	6	-	Arabidopsis thaliana
ScSPL14	G-Box	CACGTG	29	6	+	Pisum sativum	cis-acting regulatory element involved in light responsiveness
ScSPL14	G-Box	CACGTG	943	6	+	Pisum sativum	cis-acting regulatory element involved in light responsiveness
ScSPL14	ABRE	CACGTG	29	6	+	Arabidopsis thaliana	cis-acting element involved in the abscisic acid responsiveness
ScSPL14	ABRE	ACGTG	30	5	+	Arabidopsis thaliana	cis-acting element involved in the abscisic acid responsiveness
ScSPL14	ABRE	ACGTG	647	5	+	Arabidopsis thaliana	cis-acting element involved in the abscisic acid responsiveness
ScSPL14	ABRE	CGCACGTGTC	941	10	-	Hordeum vulgare	cis-acting element involved in the abscisic acid responsiveness
ScSPL14	ABRE	CACGTG	943	6	+	Arabidopsis thaliana	cis-acting element involved in the abscisic acid responsiveness
ScSPL14	ABRE	ACGTG	944	5	+	Arabidopsis thaliana	cis-acting element involved in the abscisic acid responsiveness
ScSPL14	STRE	AGGGG	22	5	+	Arabidopsis thaliana
ScSPL14	STRE	AGGGG	341	5	+	Arabidopsis thaliana
ScSPL14	STRE	AGGGG	671	5	+	Arabidopsis thaliana
ScSPL14	STRE	AGGGG	738	5	+	Arabidopsis thaliana
ScSPL14	STRE	AGGGG	1584	5	-	Arabidopsis thaliana
ScSPL14	STRE	AGGGG	1682	5	+	Arabidopsis thaliana
ScSPL14	STRE	AGGGG	1868	5	-	Arabidopsis thaliana
ScSPL14	STRE	AGGGG	1979	5	+	Arabidopsis thaliana
ScSPL14	CCAAT-box	CAACGG	1336	6	+	Hordeum vulgare
ScSPL14	CAAT-box	CAAT	207	4	+	Nicotiana glutinosa	common cis-acting element in promoter and enhancer regions
ScSPL14	CAAT-box	CAAT	240	4	-	Nicotiana glutinosa	common cis-acting element in promoter and enhancer regions
ScSPL14	CAAT-box	CAAT	281	4	+	Nicotiana glutinosa	common cis-acting element in promoter and enhancer regions
ScSPL14	CAAT-box	CAAT	497	4	+	Nicotiana glutinosa	common cis-acting element in promoter and enhancer regions
ScSPL14	CAAT-box	CAAT	499	4	-	Nicotiana glutinosa	common cis-acting element in promoter and enhancer regions
ScSPL14	CAAT-box	CAAAT	547	5	+	Pisum sativum	common cis-acting element in promoter and enhancer regions
ScSPL14	CAAT-box	CAACCAACTCC	561	10	-	Arabidopsis thaliana	common cis-acting element in promoter and enhancer regions
ScSPL14	CAAT-box	CAAT	622	4	+	Nicotiana glutinosa	common cis-acting element in promoter and enhancer regions
ScSPL14	CAAT-box	CAAAT	753	5	-	Pisum sativum	common cis-acting element in promoter and enhancer regions
ScSPL14	CAAT-box	CAAAT	810	5	+	Pisum sativum	common cis-acting element in promoter and enhancer regions
ScSPL14	CAAT-box	CAAT	819	4	+	Nicotiana glutinosa	common cis-acting element in promoter and enhancer regions
ScSPL14	CAAT-box	CAAT	1079	4	+	Nicotiana glutinosa	common cis-acting element in promoter and enhancer regions
ScSPL14	CAAT-box	CAAT	1216	4	+	Nicotiana glutinosa	common cis-acting element in promoter and enhancer regions
ScSPL14	CAAT-box	CAAT	1275	4	-	Nicotiana glutinosa	common cis-acting element in promoter and enhancer regions
ScSPL14	CAAT-box	CAAT	1296	4	-	Nicotiana glutinosa	common cis-acting element in promoter and enhancer regions
ScSPL14	CAAT-box	CAAT	1421	4	+	Nicotiana glutinosa	common cis-acting element in promoter and enhancer regions
ScSPL14	CAAT-box	CAAT	1817	4	-	Nicotiana glutinosa	common cis-acting element in promoter and enhancer regions
ScSPL14	CCGTCC-box	CCGTCC	1525	6	+	Petroselinum hortense
ScSPL14	Unnamed__2	CCCCGG	229	6	-	Zea mays
ScSPL14	AuxRE	TGTCTCAATAAG	1272	11	-	Glycine max
ScSPL14	Box 4	ATTAAT	524	6	+	Petroselinum crispum	part of a conserved DNA module involved in light responsiveness
ScSPL14	TCT-motif	TCTTAC	491	6	-	Arabidopsis thaliana	part of a light responsive element
ScSPL14	MYB recognition site	CCGTTG	1336	6	-	Arabidopsis thaliana
ScSPL14	CCGTCC motif	CCGTCC	1525	6	+	Nicotiana tabacum
ScSPL14	TATA-box	TATA	176	4	+	Arabidopsis thaliana	core promoter element around -30 of transcription start
ScSPL14	TATA-box	TATAA	304	5	-	Arabidopsis thaliana	core promoter element around -30 of transcription start
ScSPL14	TATA-box	TATA	305	4	+	Arabidopsis thaliana	core promoter element around -30 of transcription start
ScSPL14	TATA-box	TACAAAA	316	7	+	Oryza sativa	core promoter element around -30 of transcription start
ScSPL14	TATA-box	TACAAAA	484	7	-	Oryza sativa	core promoter element around -30 of transcription start
ScSPL14	TATA-box	TATAA	791	5	-	Arabidopsis thaliana	core promoter element around -30 of transcription start
ScSPL14	TATA-box	TATA	792	4	+	Arabidopsis thaliana	core promoter element around -30 of transcription start
ScSPL14	TATA-box	TATA	1367	4	-	Arabidopsis thaliana	core promoter element around -30 of transcription start
ScSPL14	TATA-box	TATA	1492	4	-	Arabidopsis thaliana	core promoter element around -30 of transcription start
ScSPL14	TATA-box	TATA	1548	4	-	Arabidopsis thaliana	core promoter element around -30 of transcription start
ScSPL14	TATA-box	TATA	1676	4	-	Arabidopsis thaliana	core promoter element around -30 of transcription start
ScSPL14	GC-motif	CCCCCG	230	6	-	Zea mays
ScSPL14	WRE3	CCACCT	722	6	-	Pisum sativum
ScSPL14	CAT-box	GCCACT	656	6	-	Arabidopsis thaliana	cis-acting regulatory element related to meristem expression
ScSPL14	CAT-box	GCCACT	1912	6	+	Arabidopsis thaliana	cis-acting regulatory element related to meristem expression
ScSPL15	O2-site	GATGACATGG	1201	9	-	Zea mays	cis-acting regulatory element involved in zein metabolism regulation
ScSPL15	TGACG-motif	TGACG	419	5	-	Hordeum vulgare	cis-acting regulatory element involved in the MeJA-responsiveness
ScSPL15	TGACG-motif	TGACG	441	5	+	Hordeum vulgare	cis-acting regulatory element involved in the MeJA-responsiveness
ScSPL15	MBS	CAACTG	55	6	+	Arabidopsis thaliana	MYB binding site involved in drought-inducibility
ScSPL15	DRE core	GCCGAC	1947	6	+	Arabidopsis thaliana
ScSPL15	Unnamed__4	CTCC	87	4	-	Petroselinum hortense
ScSPL15	Unnamed__4	CTCC	246	4	+	Petroselinum hortense
ScSPL15	Unnamed__4	CTCC	328	4	+	Petroselinum hortense
ScSPL15	Unnamed__4	CTCC	380	4	-	Petroselinum hortense
ScSPL15	Unnamed__4	CTCC	558	4	-	Petroselinum hortense
ScSPL15	Unnamed__4	CTCC	605	4	-	Petroselinum hortense
ScSPL15	Unnamed__4	CTCC	627	4	-	Petroselinum hortense
ScSPL15	Unnamed__4	CTCC	639	4	-	Petroselinum hortense
ScSPL15	Unnamed__4	CTCC	671	4	-	Petroselinum hortense
ScSPL15	Unnamed__4	CTCC	694	4	-	Petroselinum hortense
ScSPL15	Unnamed__4	CTCC	714	4	-	Petroselinum hortense
ScSPL15	Unnamed__4	CTCC	726	4	-	Petroselinum hortense
ScSPL15	Unnamed__4	CTCC	773	4	-	Petroselinum hortense
ScSPL15	Unnamed__4	CTCC	794	4	-	Petroselinum hortense
ScSPL15	Unnamed__4	CTCC	809	4	-	Petroselinum hortense
ScSPL15	Unnamed__4	CTCC	832	4	-	Petroselinum hortense
ScSPL15	Unnamed__4	CTCC	862	4	-	Petroselinum hortense
ScSPL15	Unnamed__4	CTCC	873	4	-	Petroselinum hortense
ScSPL15	Unnamed__4	CTCC	882	4	-	Petroselinum hortense
ScSPL15	Unnamed__4	CTCC	913	4	-	Petroselinum hortense
ScSPL15	Unnamed__4	CTCC	921	4	-	Petroselinum hortense
ScSPL15	Unnamed__4	CTCC	972	4	-	Petroselinum hortense
ScSPL15	Unnamed__4	CTCC	981	4	-	Petroselinum hortense
ScSPL15	Unnamed__4	CTCC	997	4	-	Petroselinum hortense
ScSPL15	Unnamed__4	CTCC	1004	4	+	Petroselinum hortense
ScSPL15	Unnamed__4	CTCC	1033	4	-	Petroselinum hortense
ScSPL15	Unnamed__4	CTCC	1165	4	+	Petroselinum hortense
ScSPL15	Unnamed__4	CTCC	1227	4	+	Petroselinum hortense
ScSPL15	Unnamed__4	CTCC	1230	4	+	Petroselinum hortense
ScSPL15	Unnamed__4	CTCC	1306	4	+	Petroselinum hortense
ScSPL15	Unnamed__4	CTCC	1374	4	+	Petroselinum hortense
ScSPL15	Unnamed__4	CTCC	1380	4	+	Petroselinum hortense
ScSPL15	Unnamed__4	CTCC	1401	4	+	Petroselinum hortense
ScSPL15	Unnamed__4	CTCC	1405	4	+	Petroselinum hortense
ScSPL15	Unnamed__4	CTCC	1467	4	-	Petroselinum hortense
ScSPL15	Unnamed__4	CTCC	1491	4	+	Petroselinum hortense
ScSPL15	Unnamed__4	CTCC	1494	4	+	Petroselinum hortense
ScSPL15	Unnamed__4	CTCC	1525	4	+	Petroselinum hortense
ScSPL15	Unnamed__4	CTCC	1547	4	+	Petroselinum hortense
ScSPL15	Unnamed__4	CTCC	1598	4	+	Petroselinum hortense
ScSPL15	Unnamed__4	CTCC	1604	4	+	Petroselinum hortense
ScSPL15	Unnamed__4	CTCC	1690	4	+	Petroselinum hortense
ScSPL15	Unnamed__4	CTCC	1695	4	+	Petroselinum hortense
ScSPL15	Unnamed__4	CTCC	1699	4	+	Petroselinum hortense
ScSPL15	Unnamed__4	CTCC	1781	4	+	Petroselinum hortense
ScSPL15	Unnamed__4	CTCC	1843	4	-	Petroselinum hortense
ScSPL15	Unnamed__4	CTCC	1863	4	-	Petroselinum hortense
ScSPL15	Myb	CAACTG	55	6	+	Arabidopsis thaliana
ScSPL15	Myb	TAACTG	1887	6	-	Arabidopsis thaliana
ScSPL15	AAGAA-motif	GAAAGAA	539	7	+	Avena sativa
ScSPL15	CGTCA-motif	CGTCA	419	5	+	Hordeum vulgare	cis-acting regulatory element involved in the MeJA-responsiveness
ScSPL15	CGTCA-motif	CGTCA	441	5	-	Hordeum vulgare	cis-acting regulatory element involved in the MeJA-responsiveness
ScSPL15	AC-II	CCACCAACCCCC	1335	11	+	Phaseolus vulgaris
ScSPL15	as-1	TGACG	419	5	-	Arabidopsis thaliana
ScSPL15	as-1	TGACG	441	5	+	Arabidopsis thaliana
ScSPL15	TC-rich repeats	GTTTTCTTAC	1122	9	-	Nicotiana tabacum	cis-acting element involved in defense and stress responsiveness
ScSPL15	MYC	CATTTG	267	6	-	Arabidopsis thaliana
ScSPL15	A-box	CCGTCC	46	6	+	Petroselinum crispum	sequence conserved in alpha-amylase promoters
ScSPL15	CCGTCC motif	CCGTCC	46	6	+	Nicotiana tabacum
ScSPL15	GC-motif	CCCCCG	581	6	-	Zea mays
ScSPL15	GC-motif	CCCCCG	648	6	-	Zea mays
ScSPL15	GC-motif	CCCCCG	749	6	-	Zea mays
ScSPL15	GC-motif	CCCCCG	848	6	-	Zea mays
ScSPL15	GC-motif	CCCCCG	868	6	-	Zea mays
ScSPL15	GC-motif	CGGCGCCCT	884	9	-	Oryza sativa
ScSPL15	GC-motif	CCCCCG	992	6	-	Zea mays
ScSPL15	TATA-box	TATAAATA	1135	8	-	Daucus carota	core promoter element around -30 of transcription start
ScSPL15	TATA-box	TATAAAT	1136	7	-	Brassica juncea	core promoter element around -30 of transcription start
ScSPL15	TATA-box	TATAAA	1137	6	-	Helianthus annuus	core promoter element around -30 of transcription start
ScSPL15	TATA-box	TATAA	1138	5	-	Arabidopsis thaliana	core promoter element around -30 of transcription start
ScSPL15	TATA-box	TATA	1139	4	-	Arabidopsis thaliana	core promoter element around -30 of transcription start
ScSPL15	Sp1	GGGCGG	569	6	+	Oryza sativa	light responsive element
ScSPL15	Sp1	GGGCGG	574	6	+	Oryza sativa	light responsive element
ScSPL15	Sp1	GGGCGG	584	6	+	Oryza sativa	light responsive element
ScSPL15	Sp1	GGGCGG	596	6	+	Oryza sativa	light responsive element
ScSPL15	Sp1	GGGCGG	600	6	+	Oryza sativa	light responsive element
ScSPL15	Sp1	GGGCGG	618	6	+	Oryza sativa	light responsive element
ScSPL15	Sp1	GGGCGG	622	6	+	Oryza sativa	light responsive element
ScSPL15	Sp1	GGGCGG	635	6	+	Oryza sativa	light responsive element
ScSPL15	Sp1	GGGCGG	651	6	+	Oryza sativa	light responsive element
ScSPL15	Sp1	GGGCGG	663	6	+	Oryza sativa	light responsive element
ScSPL15	Sp1	GGGCGG	667	6	+	Oryza sativa	light responsive element
ScSPL15	Sp1	GGGCGG	685	6	+	Oryza sativa	light responsive element
ScSPL15	Sp1	GGGCGG	689	6	+	Oryza sativa	light responsive element
ScSPL15	Sp1	GGGCGG	705	6	+	Oryza sativa	light responsive element
ScSPL15	Sp1	GGGCGG	709	6	+	Oryza sativa	light responsive element
ScSPL15	Sp1	GGGCGG	722	6	+	Oryza sativa	light responsive element
ScSPL15	Sp1	GGGCGG	737	6	+	Oryza sativa	light responsive element
ScSPL15	Sp1	GGGCGG	742	6	+	Oryza sativa	light responsive element
ScSPL15	Sp1	GGGCGG	752	6	+	Oryza sativa	light responsive element
ScSPL15	Sp1	GGGCGG	764	6	+	Oryza sativa	light responsive element
ScSPL15	Sp1	GGGCGG	768	6	+	Oryza sativa	light responsive element
ScSPL15	Sp1	GGGCGG	790	6	+	Oryza sativa	light responsive element
ScSPL15	Sp1	GGGCGG	801	6	+	Oryza sativa	light responsive element
ScSPL15	Sp1	GGGCGG	805	6	+	Oryza sativa	light responsive element
ScSPL15	Sp1	GGGCGG	823	6	+	Oryza sativa	light responsive element
ScSPL15	Sp1	GGGCGG	827	6	+	Oryza sativa	light responsive element
ScSPL15	Sp1	GGGCGG	840	6	+	Oryza sativa	light responsive element
ScSPL15	Sp1	GGGCGG	845	6	+	Oryza sativa	light responsive element
ScSPL15	Sp1	GGGCGG	865	6	+	Oryza sativa	light responsive element
ScSPL15	Sp1	GGGCGG	904	6	+	Oryza sativa	light responsive element
ScSPL15	Sp1	GGGCGG	916	6	+	Oryza sativa	light responsive element
ScSPL15	Sp1	GGGCGG	935	6	+	Oryza sativa	light responsive element
ScSPL15	Sp1	GGGCGG	939	6	+	Oryza sativa	light responsive element
ScSPL15	Sp1	GGGCGG	944	6	+	Oryza sativa	light responsive element
ScSPL15	TCA-element	CCATCTTTTT	1615	9	+	Nicotiana tabacum	cis-acting element involved in salicylic acid responsiveness
ScSPL15	GATA-motif	GATAGGG	1709	7	-	Pisum sativum	part of a light responsive element
ScSPL15	CAAT-box	CAAT	114	4	+	Nicotiana glutinosa	common cis-acting element in promoter and enhancer regions
ScSPL15	CAAT-box	CAAT	176	4	+	Nicotiana glutinosa	common cis-acting element in promoter and enhancer regions
ScSPL15	CAAT-box	CAAAT	267	5	+	Pisum sativum	common cis-acting element in promoter and enhancer regions
ScSPL15	CAAT-box	CAAT	422	4	+	Nicotiana glutinosa	common cis-acting element in promoter and enhancer regions
ScSPL15	CAAT-box	CCAAT	447	5	+	Arabidopsis thaliana	common cis-acting element in promoter and enhancer regions
ScSPL15	CAAT-box	CAAT	448	4	+	Nicotiana glutinosa	common cis-acting element in promoter and enhancer regions
ScSPL15	CAAT-box	CAAAT	1073	5	-	Pisum sativum	common cis-acting element in promoter and enhancer regions
ScSPL15	CAAT-box	CAAAT	1146	5	-	Pisum sativum	common cis-acting element in promoter and enhancer regions
ScSPL15	CAAT-box	CAAT	1254	4	-	Nicotiana glutinosa	common cis-acting element in promoter and enhancer regions
ScSPL15	CAAT-box	CAAT	1299	4	-	Nicotiana glutinosa	common cis-acting element in promoter and enhancer regions
ScSPL15	CAAT-box	CAAT	1416	4	-	Nicotiana glutinosa	common cis-acting element in promoter and enhancer regions
ScSPL15	CAAT-box	CCAAT	1447	5	+	Arabidopsis thaliana	common cis-acting element in promoter and enhancer regions
ScSPL15	CAAT-box	CAAT	1448	4	+	Nicotiana glutinosa	common cis-acting element in promoter and enhancer regions
ScSPL15	CAAT-box	CAAT	1806	4	+	Nicotiana glutinosa	common cis-acting element in promoter and enhancer regions
ScSPL15	CCGTCC-box	CCGTCC	46	6	+	Petroselinum hortense
ScSPL15	Unnamed__2	CCCCGG	566	6	-	Zea mays
ScSPL15	Unnamed__2	CCCCGG	580	6	-	Zea mays
ScSPL15	Unnamed__2	CCCCGG	647	6	-	Zea mays
ScSPL15	Unnamed__2	CCCCGG	734	6	-	Zea mays
ScSPL15	Unnamed__2	CCCCGG	748	6	-	Zea mays
ScSPL15	Unnamed__2	CCCCGG	798	6	-	Zea mays
ScSPL15	MYB	CAACCA	1820	6	-	Arabidopsis thaliana
ScSPL15	MBSI	TTTTTACGGTTA	1117	11	-	Petunia hybrida	MYB binding site involved in flavonoid biosynthetic genes regulation
ScSPL15	MBSI	aaaAaaC(G/C)GTTA	1125	12	+	Petunia hybrida	MYB binding site involved in flavonoid biosynthetic genes regulation
ScSPL15	G-Box	CACGTT	1745	6	+	Pisum sativum	cis-acting regulatory element involved in light responsiveness
ScSPL15	CTAG-motif	ACTAGCAGAA	1277	9	-	Avena sativa
ScSPL15	CTAG-motif	ACTAGCAGAA	1349	9	+	Avena sativa
ScSPL15	STRE	AGGGG	154	5	+	Arabidopsis thaliana
ScSPL15	STRE	AGGGG	1085	5	+	Arabidopsis thaliana
ScSPL15	STRE	AGGGG	1184	5	+	Arabidopsis thaliana
ScSPL15	STRE	AGGGG	1224	5	-	Arabidopsis thaliana
ScSPL15	STRE	AGGGG	1249	5	+	Arabidopsis thaliana
ScSPL15	STRE	AGGGG	1344	5	-	Arabidopsis thaliana
ScSPL15	STRE	AGGGG	1849	5	+	Arabidopsis thaliana
ScSPL15	ABRE	CGTACGTGCA	1743	9	-	Hordeum vulgare	cis-acting element involved in the abscisic acid responsiveness
ScSPL15	ABRE	ACGTG	1745	5	-	Arabidopsis thaliana	cis-acting element involved in the abscisic acid responsiveness
ScSPL16	I-box	AGATAAGG	591	8	-	Triticum aestivum	part of a light responsive element
ScSPL16	I-box	AGATAAGG	1084	8	-	Triticum aestivum	part of a light responsive element
ScSPL16	I-box	cGATAAGGCG	1564	9	-	Zea mays	part of a light responsive element
ScSPL16	MYB	CAACAG	283	6	-	Arabidopsis thaliana
ScSPL16	MYB	CAACCA	598	6	-	Arabidopsis thaliana
ScSPL16	MYB	CAACCA	1468	6	-	Arabidopsis thaliana
ScSPL16	MYB	CAACCA	1505	6	-	Arabidopsis thaliana
ScSPL16	MYB	CAACAG	1767	6	-	Arabidopsis thaliana
ScSPL16	MYB	CAACAG	1962	6	-	Arabidopsis thaliana
ScSPL16	G-Box	CACGTT	980	6	-	Pisum sativum	cis-acting regulatory element involved in light responsiveness
ScSPL16	TCA	TCATCTTCAT	1899	9	+	Pisum sativum
ScSPL16	ABRE	ACGTG	981	5	+	Arabidopsis thaliana	cis-acting element involved in the abscisic acid responsiveness
ScSPL16	CTAG-motif	ACTAGCAGAA	1552	9	+	Avena sativa
ScSPL16	STRE	AGGGG	361	5	-	Arabidopsis thaliana
ScSPL16	STRE	AGGGG	392	5	+	Arabidopsis thaliana
ScSPL16	STRE	AGGGG	780	5	+	Arabidopsis thaliana
ScSPL16	STRE	AGGGG	803	5	-	Arabidopsis thaliana
ScSPL16	STRE	AGGGG	837	5	-	Arabidopsis thaliana
ScSPL16	STRE	AGGGG	890	5	-	Arabidopsis thaliana
ScSPL16	STRE	AGGGG	908	5	-	Arabidopsis thaliana
ScSPL16	STRE	AGGGG	935	5	+	Arabidopsis thaliana
ScSPL16	STRE	AGGGG	1141	5	-	Arabidopsis thaliana
ScSPL16	STRE	AGGGG	1327	5	+	Arabidopsis thaliana
ScSPL16	STRE	AGGGG	1591	5	+	Arabidopsis thaliana
ScSPL16	P-box	CCTTTTG	1143	7	+	Oryza sativa	gibberellin-responsive element
ScSPL16	P-box	CCTTTTG	1323	7	-	Oryza sativa	gibberellin-responsive element
ScSPL16	CAAT-box	CCAAT	121	5	-	Arabidopsis thaliana	common cis-acting element in promoter and enhancer regions
ScSPL16	CAAT-box	CAAAT	457	5	+	Pisum sativum	common cis-acting element in promoter and enhancer regions
ScSPL16	CAAT-box	CAAAT	536	5	-	Pisum sativum	common cis-acting element in promoter and enhancer regions
ScSPL16	CAAT-box	CAAT	574	4	-	Nicotiana glutinosa	common cis-acting element in promoter and enhancer regions
ScSPL16	CAAT-box	CAAT	617	4	-	Nicotiana glutinosa	common cis-acting element in promoter and enhancer regions
ScSPL16	CAAT-box	CAAT	748	4	-	Nicotiana glutinosa	common cis-acting element in promoter and enhancer regions
ScSPL16	CAAT-box	CAAAT	944	5	-	Pisum sativum	common cis-acting element in promoter and enhancer regions
ScSPL16	CAAT-box	CAAAT	949	5	-	Pisum sativum	common cis-acting element in promoter and enhancer regions
ScSPL16	CAAT-box	CAAAT	989	5	+	Pisum sativum	common cis-acting element in promoter and enhancer regions
ScSPL16	CAAT-box	CAAAT	1214	5	-	Pisum sativum	common cis-acting element in promoter and enhancer regions
ScSPL16	CAAT-box	CAAAT	1381	5	+	Pisum sativum	common cis-acting element in promoter and enhancer regions
ScSPL16	CAAT-box	CCAAT	1445	5	-	Arabidopsis thaliana	common cis-acting element in promoter and enhancer regions
ScSPL16	CAAT-box	CCAAT	1522	5	-	Arabidopsis thaliana	common cis-acting element in promoter and enhancer regions
ScSPL16	CAAT-box	CAAAT	1586	5	-	Pisum sativum	common cis-acting element in promoter and enhancer regions
ScSPL16	CCGTCC-box	CCGTCC	916	6	+	Petroselinum hortense
ScSPL16	CCGTCC-box	CCGTCC	926	6	+	Petroselinum hortense
ScSPL16	Unnamed__2	CCCCGG	1192	6	+	Zea mays
ScSPL16	Unnamed__2	CCCCGG	1234	6	-	Zea mays
ScSPL16	Unnamed__2	CCCCGG	1275	6	-	Zea mays
ScSPL16	Unnamed__2	CCCCGG	1309	6	+	Zea mays
ScSPL16	Unnamed__2	CCCCGG	1461	6	-	Zea mays
ScSPL16	Unnamed__2	CCCCGG	1499	6	-	Zea mays
ScSPL16	Unnamed__2	CCCCGG	1695	6	-	Zea mays
ScSPL16	GA-motif	ATAGATAA	24	8	-	Arabidopsis thaliana	part of a light responsive element
ScSPL16	ATCT-motif	AATCTAATCC	1579	9	-	Pisum sativum	part of a conserved DNA module involved in light responsiveness
ScSPL16	TCT-motif	TCTTAC	724	6	-	Arabidopsis thaliana	part of a light responsive element
ScSPL16	Myb-binding site	CAACAG	283	6	-	Nicotiana tabacum
ScSPL16	Myb-binding site	CAACAG	1767	6	-	Nicotiana tabacum
ScSPL16	Myb-binding site	CAACAG	1962	6	-	Nicotiana tabacum
ScSPL16	CCGTCC motif	CCGTCC	916	6	+	Nicotiana tabacum
ScSPL16	CCGTCC motif	CCGTCC	926	6	+	Nicotiana tabacum
ScSPL16	Sp1	GGGCGG	1664	6	-	Oryza sativa	light responsive element
ScSPL16	TATA-box	TATA	3	4	+	Arabidopsis thaliana	core promoter element around -30 of transcription start
ScSPL16	TATA-box	TATA	29	4	+	Arabidopsis thaliana	core promoter element around -30 of transcription start
ScSPL16	TATA-box	taTATAAAtc	90	9	+	Arabidopsis thaliana	core promoter element around -30 of transcription start
ScSPL16	TATA-box	TATA	299	4	+	Arabidopsis thaliana	core promoter element around -30 of transcription start
ScSPL16	TATA-box	TATA	879	4	+	Arabidopsis thaliana	core promoter element around -30 of transcription start
ScSPL16	TATA-box	TATA	1549	4	-	Arabidopsis thaliana	core promoter element around -30 of transcription start
ScSPL16	GC-motif	CCCCCG	1462	6	-	Zea mays
ScSPL16	WRE3	CCACCT	503	6	-	Pisum sativum
ScSPL16	WRE3	CCACCT	1668	6	+	Pisum sativum
ScSPL16	Unnamed__16	GCTGCCCGTC	904	9	+	Zea mays
ScSPL16	MYC	CATGTG	37	6	+	Arabidopsis thaliana
ScSPL16	MYC	CATGTG	315	6	+	Arabidopsis thaliana
ScSPL16	MYC	CATGTG	397	6	+	Arabidopsis thaliana
ScSPL16	MYC	CATTTG	535	6	+	Arabidopsis thaliana
ScSPL16	A-box	CCGTCC	916	6	+	Petroselinum crispum	sequence conserved in alpha-amylase promoters
ScSPL16	A-box	CCGTCC	926	6	+	Petroselinum crispum	sequence conserved in alpha-amylase promoters
ScSPL16	W box	TTGACC	357	6	+	Arabidopsis thaliana
ScSPL16	as-1	TGACG	1152	5	+	Arabidopsis thaliana
ScSPL16	as-1	TGACG	1187	5	+	Arabidopsis thaliana
ScSPL16	as-1	TGACG	1205	5	-	Arabidopsis thaliana
ScSPL16	as-1	TGACG	1281	5	-	Arabidopsis thaliana
ScSPL16	as-1	TGACG	1316	5	-	Arabidopsis thaliana
ScSPL16	as-1	TGACG	1917	5	+	Arabidopsis thaliana
ScSPL16	Unnamed__1	CGTGG	982	5	+	Zea mays
ScSPL16	dOCT	CACGGATC	953	8	-	Zea mays
ScSPL16	LTR	CCGAAA	622	6	-	Hordeum vulgare	cis-acting element involved in low-temperature responsiveness
ScSPL16	AAGAA-motif	GAAAGAA	797	7	-	Avena sativa
ScSPL16	AAGAA-motif	gGTAAAGAAA	850	9	+	Avena sativa
ScSPL16	AAGAA-motif	GAAAGAA	1535	7	-	Avena sativa
ScSPL16	TCCC-motif	TCTCCCT	737	7	+	Spinacia oleracea	part of a light responsive element
ScSPL16	Myb	TAACTG	1913	6	+	Arabidopsis thaliana
ScSPL16	Myb	CAACTG	1970	6	-	Arabidopsis thaliana
ScSPL16	AC-II	CCACCAACCCCC	1051	11	-	Phaseolus vulgaris
ScSPL16	ARE	AAACCA	405	6	-	Zea mays	cis-acting regulatory element essential for the anaerobic induction
ScSPL16	CGTCA-motif	CGTCA	1152	5	-	Hordeum vulgare	cis-acting regulatory element involved in the MeJA-responsiveness
ScSPL16	CGTCA-motif	CGTCA	1187	5	-	Hordeum vulgare	cis-acting regulatory element involved in the MeJA-responsiveness
ScSPL16	CGTCA-motif	CGTCA	1205	5	+	Hordeum vulgare	cis-acting regulatory element involved in the MeJA-responsiveness
ScSPL16	CGTCA-motif	CGTCA	1281	5	+	Hordeum vulgare	cis-acting regulatory element involved in the MeJA-responsiveness
ScSPL16	CGTCA-motif	CGTCA	1316	5	+	Hordeum vulgare	cis-acting regulatory element involved in the MeJA-responsiveness
ScSPL16	CGTCA-motif	CGTCA	1917	5	-	Hordeum vulgare	cis-acting regulatory element involved in the MeJA-responsiveness
ScSPL16	GT1-motif	GTGTGTGAA	419	9	+	Solanum tuberosum	light responsive element
ScSPL16	TGACG-motif	TGACG	1152	5	+	Hordeum vulgare	cis-acting regulatory element involved in the MeJA-responsiveness
ScSPL16	TGACG-motif	TGACG	1187	5	+	Hordeum vulgare	cis-acting regulatory element involved in the MeJA-responsiveness
ScSPL16	TGACG-motif	TGACG	1205	5	-	Hordeum vulgare	cis-acting regulatory element involved in the MeJA-responsiveness
ScSPL16	TGACG-motif	TGACG	1281	5	-	Hordeum vulgare	cis-acting regulatory element involved in the MeJA-responsiveness
ScSPL16	TGACG-motif	TGACG	1316	5	-	Hordeum vulgare	cis-acting regulatory element involved in the MeJA-responsiveness
ScSPL16	TGACG-motif	TGACG	1917	5	+	Hordeum vulgare	cis-acting regulatory element involved in the MeJA-responsiveness
ScSPL16	GARE-motif	TCTGTTG	1961	7	+	Brassica oleracea	gibberellin-responsive element
ScSPL16	G-box	GCCACGTGGA	978	9	+	Arabidopsis thaliana	cis-acting regulatory element involved in light responsiveness
ScSPL16	Unnamed__4	CTCC	50	4	+	Petroselinum hortense
ScSPL16	Unnamed__4	CTCC	153	4	-	Petroselinum hortense
ScSPL16	Unnamed__4	CTCC	156	4	-	Petroselinum hortense
ScSPL16	Unnamed__4	CTCC	236	4	-	Petroselinum hortense
ScSPL16	Unnamed__4	CTCC	390	4	-	Petroselinum hortense
ScSPL16	Unnamed__4	CTCC	606	4	+	Petroselinum hortense
ScSPL16	Unnamed__4	CTCC	609	4	+	Petroselinum hortense
ScSPL16	Unnamed__4	CTCC	626	4	-	Petroselinum hortense
ScSPL16	Unnamed__4	CTCC	643	4	+	Petroselinum hortense
ScSPL16	Unnamed__4	CTCC	674	4	-	Petroselinum hortense
ScSPL16	Unnamed__4	CTCC	689	4	-	Petroselinum hortense
ScSPL16	Unnamed__4	CTCC	714	4	-	Petroselinum hortense
ScSPL16	Unnamed__4	CTCC	738	4	+	Petroselinum hortense
ScSPL16	Unnamed__4	CTCC	840	4	+	Petroselinum hortense
ScSPL16	Unnamed__4	CTCC	887	4	+	Petroselinum hortense
ScSPL16	Unnamed__4	CTCC	893	4	+	Petroselinum hortense
ScSPL16	Unnamed__4	CTCC	897	4	+	Petroselinum hortense
ScSPL16	Unnamed__4	CTCC	911	4	+	Petroselinum hortense
ScSPL16	Unnamed__4	CTCC	962	4	-	Petroselinum hortense
ScSPL16	Unnamed__4	CTCC	985	4	-	Petroselinum hortense
ScSPL16	Unnamed__4	CTCC	1016	4	+	Petroselinum hortense
ScSPL16	Unnamed__4	CTCC	1595	4	-	Petroselinum hortense
ScSPL16	Unnamed__4	CTCC	1628	4	-	Petroselinum hortense
ScSPL16	Unnamed__4	CTCC	1637	4	+	Petroselinum hortense
ScSPL16	Unnamed__4	CTCC	1662	4	+	Petroselinum hortense
ScSPL16	Unnamed__4	CTCC	1699	4	-	Petroselinum hortense
ScSPL16	Unnamed__4	CTCC	1703	4	+	Petroselinum hortense
ScSPL16	Unnamed__4	CTCC	1716	4	+	Petroselinum hortense
ScSPL16	Unnamed__4	CTCC	1737	4	-	Petroselinum hortense
ScSPL16	Unnamed__4	CTCC	1740	4	-	Petroselinum hortense
ScSPL16	Unnamed__4	CTCC	1744	4	-	Petroselinum hortense
ScSPL16	Unnamed__4	CTCC	1783	4	-	Petroselinum hortense
ScSPL16	Unnamed__4	CTCC	1787	4	-	Petroselinum hortense
ScSPL16	Unnamed__4	CTCC	1790	4	-	Petroselinum hortense
ScSPL16	Unnamed__4	CTCC	1852	4	+	Petroselinum hortense
ScSPL16	MBS	CAACTG	1970	6	-	Arabidopsis thaliana	MYB binding site involved in drought-inducibility
ScSPL17	Box 4	ATTAAT	1440	6	-	Petroselinum crispum	part of a conserved DNA module involved in light responsiveness
ScSPL17	GATA-motif	GATAGGA	563	7	-	Arabidopsis thaliana	part of a light responsive element
ScSPL17	ATCT-motif	AATCTAATCC	59	9	-	Pisum sativum	part of a conserved DNA module involved in light responsiveness
ScSPL17	Myb-binding site	CAACAG	1201	6	+	Nicotiana tabacum
ScSPL17	Myb-binding site	CAACAG	1342	6	-	Nicotiana tabacum
ScSPL17	Myb-binding site	CAACAG	1766	6	-	Nicotiana tabacum
ScSPL17	TATA-box	TATA	724	4	+	Arabidopsis thaliana	core promoter element around -30 of transcription start
ScSPL17	TATA-box	TATA	1332	4	-	Arabidopsis thaliana	core promoter element around -30 of transcription start
ScSPL17	TATA-box	TATA	1450	4	-	Arabidopsis thaliana	core promoter element around -30 of transcription start
ScSPL17	GC-motif	CCCCCG	1008	6	-	Zea mays
ScSPL17	GC-motif	CCCCCG	1045	6	-	Zea mays
ScSPL17	GC-motif	CGGCGCCCT	1622	9	+	Oryza sativa
ScSPL17	Sp1	GGGCGG	894	6	+	Oryza sativa	light responsive element
ScSPL17	Sp1	GGGCGG	1011	6	+	Oryza sativa	light responsive element
ScSPL17	Sp1	GGGCGG	1481	6	-	Oryza sativa	light responsive element
ScSPL17	CCGTCC motif	CCGTCC	1820	6	-	Nicotiana tabacum
ScSPL17	CAT-box	GCCACT	1593	6	+	Arabidopsis thaliana	cis-acting regulatory element related to meristem expression
ScSPL17	WRE3	CCACCT	1795	6	-	Pisum sativum
ScSPL17	WRE3	CCACCT	1967	6	+	Pisum sativum
ScSPL17	RY-element	CATGCATG	1417	8	-	Helianthus annuus
ScSPL17	MYB	CAACAG	1201	6	+	Arabidopsis thaliana
ScSPL17	MYB	CAACAG	1342	6	-	Arabidopsis thaliana
ScSPL17	MYB	CAACAG	1766	6	-	Arabidopsis thaliana
ScSPL17	I-box	cCATATCCAAT	24	10	+	Flaveria trinervia	part of a light responsive element
ScSPL17	I-box	cCATATCCAAT	665	10	+	Flaveria trinervia	part of a light responsive element
ScSPL17	MBSI	aaaAaaC(G/C)GTTA	421	10	+	Petunia hybrida	MYB binding site involved in flavonoid biosynthetic genes regulation
ScSPL17	STRE	AGGGG	886	5	+	Arabidopsis thaliana
ScSPL17	ABRE	GCAACGTGTC	1283	9	-	Hordeum vulgare	cis-acting element involved in the abscisic acid responsiveness
ScSPL17	CAAT-box	CAAT	92	4	-	Nicotiana glutinosa	common cis-acting element in promoter and enhancer regions
ScSPL17	CAAT-box	CAAT	115	4	+	Nicotiana glutinosa	common cis-acting element in promoter and enhancer regions
ScSPL17	CAAT-box	CCAAT	129	5	+	Arabidopsis thaliana	common cis-acting element in promoter and enhancer regions
ScSPL17	CAAT-box	CAAT	130	4	+	Nicotiana glutinosa	common cis-acting element in promoter and enhancer regions
ScSPL17	CAAT-box	CAAT	145	4	-	Nicotiana glutinosa	common cis-acting element in promoter and enhancer regions
ScSPL17	CAAT-box	CAAAT	176	5	-	Pisum sativum	common cis-acting element in promoter and enhancer regions
ScSPL17	CAAT-box	CCAAT	188	5	+	Arabidopsis thaliana	common cis-acting element in promoter and enhancer regions
ScSPL17	CAAT-box	CAAT	189	4	+	Nicotiana glutinosa	common cis-acting element in promoter and enhancer regions
ScSPL17	CAAT-box	CAAAT	225	5	+	Pisum sativum	common cis-acting element in promoter and enhancer regions
ScSPL17	CAAT-box	CAAT	251	4	+	Nicotiana glutinosa	common cis-acting element in promoter and enhancer regions
ScSPL17	CAAT-box	TGCCAAC	342	7	+	Petunia hybrida	common cis-acting element in promoter and enhancer regions
ScSPL17	CAAT-box	CAAT	452	4	+	Nicotiana glutinosa	common cis-acting element in promoter and enhancer regions
ScSPL17	CAAT-box	CAAT	543	4	+	Nicotiana glutinosa	common cis-acting element in promoter and enhancer regions
ScSPL17	CAAT-box	CAAT	560	4	+	Nicotiana glutinosa	common cis-acting element in promoter and enhancer regions
ScSPL17	CAAT-box	CAAAT	574	5	+	Pisum sativum	common cis-acting element in promoter and enhancer regions
ScSPL17	CAAT-box	CAAT	621	4	-	Nicotiana glutinosa	common cis-acting element in promoter and enhancer regions
ScSPL17	CAAT-box	CAAT	631	4	-	Nicotiana glutinosa	common cis-acting element in promoter and enhancer regions
ScSPL17	CAAT-box	CAAT	643	4	-	Nicotiana glutinosa	common cis-acting element in promoter and enhancer regions
ScSPL17	CAAT-box	CAAAT	671	5	+	Pisum sativum	common cis-acting element in promoter and enhancer regions
ScSPL17	CAAT-box	CAAT	711	4	+	Nicotiana glutinosa	common cis-acting element in promoter and enhancer regions
ScSPL17	CAAT-box	CAAT	718	4	+	Nicotiana glutinosa	common cis-acting element in promoter and enhancer regions
ScSPL17	CAAT-box	CAAT	740	4	+	Nicotiana glutinosa	common cis-acting element in promoter and enhancer regions
ScSPL17	CAAT-box	CAAAT	757	5	+	Pisum sativum	common cis-acting element in promoter and enhancer regions
ScSPL17	CAAT-box	CAAT	773	4	+	Nicotiana glutinosa	common cis-acting element in promoter and enhancer regions
ScSPL17	CAAT-box	CAAAT	1196	5	+	Pisum sativum	common cis-acting element in promoter and enhancer regions
ScSPL17	CAAT-box	CAAT	1428	4	+	Nicotiana glutinosa	common cis-acting element in promoter and enhancer regions
ScSPL17	CAAT-box	CAAT	1493	4	+	Nicotiana glutinosa	common cis-acting element in promoter and enhancer regions
ScSPL17	CAAT-box	CAAT	1524	4	-	Nicotiana glutinosa	common cis-acting element in promoter and enhancer regions
ScSPL17	CAAT-box	CAAAT	1684	5	+	Pisum sativum	common cis-acting element in promoter and enhancer regions
ScSPL17	CCGTCC-box	CCGTCC	1820	6	-	Petroselinum hortense
ScSPL17	Unnamed__2	CCCCGG	1044	6	-	Zea mays
ScSPL17	AAGAA-motif	GAAAGAA	1135	7	+	Avena sativa
ScSPL17	GCN4_motif	TGAGTCA	1423	7	-	Oryza sativa	cis-regulatory element involved in endosperm expression
ScSPL17	GT1-motif	GGTTAA	1460	6	+	Arabidopsis thaliana	light responsive element
ScSPL17	TGA-element	AACGAC	1802	6	-	Brassica oleracea	auxin-responsive element
ScSPL17	CGTCA-motif	CGTCA	1962	5	+	Hordeum vulgare	cis-acting regulatory element involved in the MeJA-responsiveness
ScSPL17	TGACG-motif	TGACG	1962	5	-	Hordeum vulgare	cis-acting regulatory element involved in the MeJA-responsiveness
ScSPL17	DRE core	GCCGAC	1737	6	-	Arabidopsis thaliana
ScSPL17	Unnamed__4	CTCC	36	4	+	Petroselinum hortense
ScSPL17	Unnamed__4	CTCC	127	4	+	Petroselinum hortense
ScSPL17	Unnamed__4	CTCC	217	4	-	Petroselinum hortense
ScSPL17	Unnamed__4	CTCC	231	4	+	Petroselinum hortense
ScSPL17	Unnamed__4	CTCC	395	4	+	Petroselinum hortense
ScSPL17	Unnamed__4	CTCC	409	4	+	Petroselinum hortense
ScSPL17	Unnamed__4	CTCC	504	4	+	Petroselinum hortense
ScSPL17	Unnamed__4	CTCC	522	4	+	Petroselinum hortense
ScSPL17	Unnamed__4	CTCC	571	4	+	Petroselinum hortense
ScSPL17	Unnamed__4	CTCC	654	4	+	Petroselinum hortense
ScSPL17	Unnamed__4	CTCC	657	4	+	Petroselinum hortense
ScSPL17	Unnamed__4	CTCC	857	4	-	Petroselinum hortense
ScSPL17	Unnamed__4	CTCC	884	4	-	Petroselinum hortense
ScSPL17	Unnamed__4	CTCC	916	4	-	Petroselinum hortense
ScSPL17	Unnamed__4	CTCC	956	4	-	Petroselinum hortense
ScSPL17	Unnamed__4	CTCC	972	4	-	Petroselinum hortense
ScSPL17	Unnamed__4	CTCC	1082	4	-	Petroselinum hortense
ScSPL17	Unnamed__4	CTCC	1094	4	-	Petroselinum hortense
ScSPL17	Unnamed__4	CTCC	1111	4	-	Petroselinum hortense
ScSPL17	Unnamed__4	CTCC	1273	4	-	Petroselinum hortense
ScSPL17	Unnamed__4	CTCC	1347	4	-	Petroselinum hortense
ScSPL17	Unnamed__4	CTCC	1390	4	+	Petroselinum hortense
ScSPL17	Unnamed__4	CTCC	1783	4	-	Petroselinum hortense
ScSPL17	Unnamed__4	CTCC	1825	4	-	Petroselinum hortense
ScSPL17	Unnamed__4	CTCC	1856	4	+	Petroselinum hortense
ScSPL17	Unnamed__4	CTCC	1893	4	+	Petroselinum hortense
ScSPL17	Unnamed__4	CTCC	1920	4	+	Petroselinum hortense
ScSPL17	G-box	CACGAC	1409	6	+	Zea mays	cis-acting regulatory element involved in light responsiveness
ScSPL17	A-box	CCGTCC	1820	6	-	Petroselinum crispum	sequence conserved in alpha-amylase promoters
ScSPL17	DRE1	ACCGAGA	1543	7	+	Zea mays
ScSPL17	MYC	CATGTG	277	6	-	Arabidopsis thaliana
ScSPL17	Unnamed__1	CGTGG	86	5	+	Zea mays
ScSPL17	Unnamed__1	CGTGG	524	5	-	Zea mays
ScSPL17	as-1	TGACG	1962	5	-	Arabidopsis thaliana
ScSPL17	W box	TTGACC	1681	6	-	Arabidopsis thaliana
ScSPL17	CAG-motif	GAAAGGCAGAC	1927	10	-	Arabidopsis thaliana
ScSPL17	LTR	CCGAAA	1677	6	-	Hordeum vulgare	cis-acting element involved in low-temperature responsiveness
ScSPL17	LTR	CCGAAA	1730	6	-	Hordeum vulgare	cis-acting element involved in low-temperature responsiveness
ScSPL18	NON-box	AGATCGACG	1086	9	+	Arabidopsis thaliana
ScSPL18	LTR	CCGAAA	142	6	+	Hordeum vulgare	cis-acting element involved in low-temperature responsiveness
ScSPL18	Unnamed__1	CGTGG	889	5	+	Zea mays
ScSPL18	Unnamed__1	CGTGG	1276	5	-	Zea mays
ScSPL18	as-1	TGACG	4	5	+	Arabidopsis thaliana
ScSPL18	as-1	TGACG	813	5	+	Arabidopsis thaliana
ScSPL18	as-1	TGACG	1377	5	+	Arabidopsis thaliana
ScSPL18	MYC	CATTTG	523	6	-	Arabidopsis thaliana
ScSPL18	MYC	CATGTG	1538	6	+	Arabidopsis thaliana
ScSPL18	GRA	CACTGGCCGCCC	1488	11	-	Zea mays
ScSPL18	HD-Zip 1	CAAT(A/T)ATTG	104	8	+	Arabidopsis thaliana	element involved in differentiation of the palisade mesophyll cells
ScSPL18	F-box	CTATTCTCATT	580	10	-	Lycopersicon esculentum
ScSPL18	G-box	CACGAC	233	6	-	Zea mays	cis-acting regulatory element involved in light responsiveness
ScSPL18	G-box	CACGAC	764	6	+	Zea mays	cis-acting regulatory element involved in light responsiveness
ScSPL18	G-box	CACGAC	809	6	-	Zea mays	cis-acting regulatory element involved in light responsiveness
ScSPL18	G-box	CACGTC	1017	6	+	Zea mays	cis-acting regulatory element involved in light responsiveness
ScSPL18	MBS	CAACTG	365	6	-	Arabidopsis thaliana	MYB binding site involved in drought-inducibility
ScSPL18	DRE core	GCCGAC	774	6	+	Arabidopsis thaliana
ScSPL18	DRE core	GCCGAC	1186	6	+	Arabidopsis thaliana
ScSPL18	DRE core	GCCGAC	1353	6	+	Arabidopsis thaliana
ScSPL18	DRE core	GCCGAC	1440	6	-	Arabidopsis thaliana
ScSPL18	Unnamed__4	CTCC	17	4	-	Petroselinum hortense
ScSPL18	Unnamed__4	CTCC	20	4	-	Petroselinum hortense
ScSPL18	Unnamed__4	CTCC	68	4	-	Petroselinum hortense
ScSPL18	Unnamed__4	CTCC	572	4	-	Petroselinum hortense
ScSPL18	Unnamed__4	CTCC	676	4	-	Petroselinum hortense
ScSPL18	Unnamed__4	CTCC	878	4	-	Petroselinum hortense
ScSPL18	Unnamed__4	CTCC	1030	4	-	Petroselinum hortense
ScSPL18	Unnamed__4	CTCC	1051	4	-	Petroselinum hortense
ScSPL18	Unnamed__4	CTCC	1178	4	-	Petroselinum hortense
ScSPL18	Unnamed__4	CTCC	1299	4	-	Petroselinum hortense
ScSPL18	Unnamed__4	CTCC	1327	4	-	Petroselinum hortense
ScSPL18	Unnamed__4	CTCC	1360	4	-	Petroselinum hortense
ScSPL18	Unnamed__4	CTCC	1417	4	+	Petroselinum hortense
ScSPL18	Unnamed__4	CTCC	1451	4	+	Petroselinum hortense
ScSPL18	Unnamed__4	CTCC	1515	4	+	Petroselinum hortense
ScSPL18	Unnamed__4	CTCC	1530	4	-	Petroselinum hortense
ScSPL18	Unnamed__4	CTCC	1610	4	-	Petroselinum hortense
ScSPL18	Unnamed__4	CTCC	1925	4	+	Petroselinum hortense
ScSPL18	Unnamed__4	CTCC	1950	4	+	Petroselinum hortense
ScSPL18	MYB-like sequence	TAACCA	613	6	+	Arabidopsis thaliana
ScSPL18	ACE	GCGACGTACC	597	9	-	Petroselinum crispum	cis-acting element involved in light responsiveness
ScSPL18	GARE-motif	TCTGTTG	708	7	-	Brassica oleracea	gibberellin-responsive element
ScSPL18	TGACG-motif	TGACG	4	5	+	Hordeum vulgare	cis-acting regulatory element involved in the MeJA-responsiveness
ScSPL18	TGACG-motif	TGACG	813	5	+	Hordeum vulgare	cis-acting regulatory element involved in the MeJA-responsiveness
ScSPL18	TGACG-motif	TGACG	1377	5	+	Hordeum vulgare	cis-acting regulatory element involved in the MeJA-responsiveness
ScSPL18	CGTCA-motif	CGTCA	4	5	-	Hordeum vulgare	cis-acting regulatory element involved in the MeJA-responsiveness
ScSPL18	CGTCA-motif	CGTCA	813	5	-	Hordeum vulgare	cis-acting regulatory element involved in the MeJA-responsiveness
ScSPL18	CGTCA-motif	CGTCA	1377	5	-	Hordeum vulgare	cis-acting regulatory element involved in the MeJA-responsiveness
ScSPL18	ARE	AAACCA	116	6	-	Zea mays	cis-acting regulatory element essential for the anaerobic induction
ScSPL18	ARE	AAACCA	152	6	-	Zea mays	cis-acting regulatory element essential for the anaerobic induction
ScSPL18	ARE	AAACCA	704	6	+	Zea mays	cis-acting regulatory element essential for the anaerobic induction
ScSPL18	ARE	AAACCA	1109	6	+	Zea mays	cis-acting regulatory element essential for the anaerobic induction
ScSPL18	TGA-element	AACGAC	803	6	+	Brassica oleracea	auxin-responsive element
ScSPL18	TGA-element	AACGAC	1020	6	-	Brassica oleracea	auxin-responsive element
ScSPL18	TGA-element	AACGAC	1213	6	+	Brassica oleracea	auxin-responsive element
ScSPL18	GT1-motif	GGTTAAT	137	7	-	Avena sativa	light responsive element
ScSPL18	GT1-motif	GGTTAA	138	6	-	Arabidopsis thaliana	light responsive element
ScSPL18	GT1-motif	GGTTAAT	174	7	-	Avena sativa	light responsive element
ScSPL18	GT1-motif	GGTTAA	175	6	-	Arabidopsis thaliana	light responsive element
ScSPL18	Myb	CAACTG	365	6	-	Arabidopsis thaliana
ScSPL18	ATC-motif	AGCTATCCA	1768	9	+	Arabidopsis thaliana	part of a conserved DNA module involved in light responsiveness
ScSPL18	AAGAA-motif	GAAAGAA	1816	7	+	Avena sativa
ScSPL18	Unnamed__2	CCCCGG	1158	6	-	Zea mays
ScSPL18	CAAT-box	CAAT	104	4	+	Nicotiana glutinosa	common cis-acting element in promoter and enhancer regions
ScSPL18	CAAT-box	CAAT	109	4	-	Nicotiana glutinosa	common cis-acting element in promoter and enhancer regions
ScSPL18	CAAT-box	CAAT	239	4	+	Nicotiana glutinosa	common cis-acting element in promoter and enhancer regions
ScSPL18	CAAT-box	CAAT	319	4	+	Nicotiana glutinosa	common cis-acting element in promoter and enhancer regions
ScSPL18	CAAT-box	CAAAT	321	5	-	Pisum sativum	common cis-acting element in promoter and enhancer regions
ScSPL18	CAAT-box	CAAT	353	4	-	Nicotiana glutinosa	common cis-acting element in promoter and enhancer regions
ScSPL18	CAAT-box	CAAT	360	4	-	Nicotiana glutinosa	common cis-acting element in promoter and enhancer regions
ScSPL18	CAAT-box	CAAAT	523	5	+	Pisum sativum	common cis-acting element in promoter and enhancer regions
ScSPL18	CAAT-box	CAAAT	538	5	-	Pisum sativum	common cis-acting element in promoter and enhancer regions
ScSPL18	CAAT-box	CAAT	732	4	+	Nicotiana glutinosa	common cis-acting element in promoter and enhancer regions
ScSPL18	CAAT-box	CCAAT	966	5	+	Arabidopsis thaliana	common cis-acting element in promoter and enhancer regions
ScSPL18	CAAT-box	CAAT	967	4	+	Nicotiana glutinosa	common cis-acting element in promoter and enhancer regions
ScSPL18	CAAT-box	CAAT	978	4	+	Nicotiana glutinosa	common cis-acting element in promoter and enhancer regions
ScSPL18	CAAT-box	CAAT	1077	4	-	Nicotiana glutinosa	common cis-acting element in promoter and enhancer regions
ScSPL18	CAAT-box	CAAAT	1619	5	-	Pisum sativum	common cis-acting element in promoter and enhancer regions
ScSPL18	CAAT-box	CCAAT	1719	5	-	Arabidopsis thaliana	common cis-acting element in promoter and enhancer regions
ScSPL18	CAAT-box	CAAT	1777	4	+	Nicotiana glutinosa	common cis-acting element in promoter and enhancer regions
ScSPL18	CAAT-box	CAAAT	1965	5	+	Pisum sativum	common cis-acting element in promoter and enhancer regions
ScSPL18	GATT-motif	CTCCTGATTGGA	668	11	-	Oryza sativa
ScSPL18	STRE	AGGGG	593	5	+	Arabidopsis thaliana
ScSPL18	STRE	AGGGG	798	5	+	Arabidopsis thaliana
ScSPL18	STRE	AGGGG	1048	5	+	Arabidopsis thaliana
ScSPL18	STRE	AGGGG	1303	5	+	Arabidopsis thaliana
ScSPL18	STRE	AGGGG	1448	5	-	Arabidopsis thaliana
ScSPL18	STRE	AGGGG	1470	5	+	Arabidopsis thaliana
ScSPL18	STRE	AGGGG	1850	5	+	Arabidopsis thaliana
ScSPL18	ABRE	ACGTG	1017	5	-	Arabidopsis thaliana	cis-acting element involved in the abscisic acid responsiveness
ScSPL18	P-box	CCTTTTG	248	7	+	Oryza sativa	gibberellin-responsive element
ScSPL18	P-box	CCTTTTG	1655	7	+	Oryza sativa	gibberellin-responsive element
ScSPL18	MYB	CAACCA	311	6	-	Arabidopsis thaliana
ScSPL18	MYB	TAACCA	613	6	+	Arabidopsis thaliana
ScSPL18	MYB	CAACAG	708	6	+	Arabidopsis thaliana
ScSPL18	MYB	CAACCA	1981	6	+	Arabidopsis thaliana
ScSPL18	TCA	TCATCTTCAT	193	9	+	Pisum sativum
ScSPL18	TCA	TCATCTTCAT	627	9	-	Pisum sativum
ScSPL18	AE-box	AGAAACAA	712	8	+	Arabidopsis thaliana	part of a module for light response
ScSPL18	TCA-element	TCAGAAGAGG	61	9	-	Brassica oleracea	cis-acting element involved in salicylic acid responsiveness
ScSPL18	WRE3	CCACCT	123	6	+	Pisum sativum
ScSPL18	CAT-box	GCCACT	1496	6	-	Arabidopsis thaliana	cis-acting regulatory element related to meristem expression
ScSPL18	TATA-box	TATA	414	4	+	Arabidopsis thaliana	core promoter element around -30 of transcription start
ScSPL18	TATA-box	TATACA	438	6	-	Helianthus annuus	core promoter element around -30 of transcription start
ScSPL18	TATA-box	TATA	440	4	+	Arabidopsis thaliana	core promoter element around -30 of transcription start
ScSPL18	TATA-box	ATTATA	482	6	+	Brassica napus	core promoter element around -30 of transcription start
ScSPL18	TATA-box	TATAA	483	5	-	Arabidopsis thaliana	core promoter element around -30 of transcription start
ScSPL18	TATA-box	TATA	484	4	+	Arabidopsis thaliana	core promoter element around -30 of transcription start
ScSPL18	TATA-box	TACAAAA	1567	7	-	Oryza sativa	core promoter element around -30 of transcription start
ScSPL18	TATA-box	ATATAA	1589	6	+	Brassica oleracea	core promoter element around -30 of transcription start
ScSPL18	TATA-box	TATA	1590	4	-	Arabidopsis thaliana	core promoter element around -30 of transcription start
ScSPL18	TATA-box	TATA	1664	4	-	Arabidopsis thaliana	core promoter element around -30 of transcription start
ScSPL18	TATA-box	ATATAA	1677	6	+	Brassica oleracea	core promoter element around -30 of transcription start
ScSPL18	TATA-box	TATA	1678	4	-	Arabidopsis thaliana	core promoter element around -30 of transcription start
ScSPL18	GC-motif	CCCCCG	1403	6	+	Zea mays
ScSPL18	GC-motif	CCCCCG	1989	6	+	Zea mays
ScSPL18	Sp1	GGGCGG	1344	6	-	Oryza sativa	light responsive element
ScSPL18	Sp1	GGGCGG	1412	6	-	Oryza sativa	light responsive element
ScSPL18	Sp1	GGGCGG	1992	6	-	Oryza sativa	light responsive element
ScSPL18	TCT-motif	TCTTAC	388	6	+	Arabidopsis thaliana	part of a light responsive element
ScSPL18	Myb-binding site	CAACAG	708	6	+	Nicotiana tabacum
ScSPL19	ARE	AAACCA	163	6	+	Zea mays	cis-acting regulatory element essential for the anaerobic induction
ScSPL19	ARE	AAACCA	595	6	+	Zea mays	cis-acting regulatory element essential for the anaerobic induction
ScSPL19	CGTCA-motif	CGTCA	75	5	+	Hordeum vulgare	cis-acting regulatory element involved in the MeJA-responsiveness
ScSPL19	CGTCA-motif	CGTCA	152	5	+	Hordeum vulgare	cis-acting regulatory element involved in the MeJA-responsiveness
ScSPL19	CGTCA-motif	CGTCA	246	5	+	Hordeum vulgare	cis-acting regulatory element involved in the MeJA-responsiveness
ScSPL19	CGTCA-motif	CGTCA	353	5	-	Hordeum vulgare	cis-acting regulatory element involved in the MeJA-responsiveness
ScSPL19	CGTCA-motif	CGTCA	384	5	-	Hordeum vulgare	cis-acting regulatory element involved in the MeJA-responsiveness
ScSPL19	CGTCA-motif	CGTCA	681	5	+	Hordeum vulgare	cis-acting regulatory element involved in the MeJA-responsiveness
ScSPL19	CGTCA-motif	CGTCA	741	5	+	Hordeum vulgare	cis-acting regulatory element involved in the MeJA-responsiveness
ScSPL19	CGTCA-motif	CGTCA	787	5	-	Hordeum vulgare	cis-acting regulatory element involved in the MeJA-responsiveness
ScSPL19	CGTCA-motif	CGTCA	1162	5	+	Hordeum vulgare	cis-acting regulatory element involved in the MeJA-responsiveness
ScSPL19	CGTCA-motif	CGTCA	1863	5	+	Hordeum vulgare	cis-acting regulatory element involved in the MeJA-responsiveness
ScSPL19	TGA-element	AACGAC	1725	6	-	Brassica oleracea	auxin-responsive element
ScSPL19	TGA-element	AACGAC	1957	6	-	Brassica oleracea	auxin-responsive element
ScSPL19	AuxRR-core	GGTCCAT	846	7	+	Nicotiana tabacum	cis-acting regulatory element involved in auxin responsiveness
ScSPL19	Box II -like sequence	TCCGTGTACCA	451	10	+	Oryza sativa
ScSPL19	Myb	CAACTG	807	6	+	Arabidopsis thaliana
ScSPL19	G-box	CACGTC	150	6	+	Zea mays	cis-acting regulatory element involved in light responsiveness
ScSPL19	G-box	CACGTG	155	6	+	Arabidopsis thaliana	cis-acting regulatory element involved in light responsiveness
ScSPL19	G-box	CACGTC	739	6	+	Zea mays	cis-acting regulatory element involved in light responsiveness
ScSPL19	Unnamed__4	CTCC	186	4	+	Petroselinum hortense
ScSPL19	Unnamed__4	CTCC	380	4	-	Petroselinum hortense
ScSPL19	Unnamed__4	CTCC	618	4	+	Petroselinum hortense
ScSPL19	Unnamed__4	CTCC	1050	4	+	Petroselinum hortense
ScSPL19	Unnamed__4	CTCC	1396	4	+	Petroselinum hortense
ScSPL19	Unnamed__4	CTCC	1526	4	+	Petroselinum hortense
ScSPL19	Unnamed__4	CTCC	1557	4	+	Petroselinum hortense
ScSPL19	Unnamed__4	CTCC	1569	4	+	Petroselinum hortense
ScSPL19	Unnamed__4	CTCC	1573	4	+	Petroselinum hortense
ScSPL19	Unnamed__4	CTCC	1581	4	+	Petroselinum hortense
ScSPL19	Unnamed__4	CTCC	1591	4	+	Petroselinum hortense
ScSPL19	Unnamed__4	CTCC	1599	4	+	Petroselinum hortense
ScSPL19	Unnamed__4	CTCC	1607	4	+	Petroselinum hortense
ScSPL19	Unnamed__4	CTCC	1622	4	+	Petroselinum hortense
ScSPL19	Unnamed__4	CTCC	1639	4	+	Petroselinum hortense
ScSPL19	Unnamed__4	CTCC	1664	4	-	Petroselinum hortense
ScSPL19	Unnamed__4	CTCC	1683	4	+	Petroselinum hortense
ScSPL19	Unnamed__4	CTCC	1688	4	-	Petroselinum hortense
ScSPL19	Unnamed__4	CTCC	1746	4	+	Petroselinum hortense
ScSPL19	Unnamed__4	CTCC	1889	4	-	Petroselinum hortense
ScSPL19	Unnamed__4	CTCC	1908	4	+	Petroselinum hortense
ScSPL19	Unnamed__4	CTCC	1915	4	+	Petroselinum hortense
ScSPL19	Unnamed__4	CTCC	1934	4	+	Petroselinum hortense
ScSPL19	Unnamed__4	CTCC	1948	4	-	Petroselinum hortense
ScSPL19	Unnamed__4	CTCC	1993	4	-	Petroselinum hortense
ScSPL19	MBS	CAACTG	807	6	+	Arabidopsis thaliana	MYB binding site involved in drought-inducibility
ScSPL19	DRE core	GCCGAC	1897	6	+	Arabidopsis thaliana
ScSPL19	ACE	GACACGTATG	213	9	-	Petroselinum crispum	cis-acting element involved in light responsiveness
ScSPL19	TGACG-motif	TGACG	75	5	-	Hordeum vulgare	cis-acting regulatory element involved in the MeJA-responsiveness
ScSPL19	TGACG-motif	TGACG	152	5	-	Hordeum vulgare	cis-acting regulatory element involved in the MeJA-responsiveness
ScSPL19	TGACG-motif	TGACG	246	5	-	Hordeum vulgare	cis-acting regulatory element involved in the MeJA-responsiveness
ScSPL19	TGACG-motif	TGACG	353	5	+	Hordeum vulgare	cis-acting regulatory element involved in the MeJA-responsiveness
ScSPL19	TGACG-motif	TGACG	384	5	+	Hordeum vulgare	cis-acting regulatory element involved in the MeJA-responsiveness
ScSPL19	TGACG-motif	TGACG	681	5	-	Hordeum vulgare	cis-acting regulatory element involved in the MeJA-responsiveness
ScSPL19	TGACG-motif	TGACG	741	5	-	Hordeum vulgare	cis-acting regulatory element involved in the MeJA-responsiveness
ScSPL19	TGACG-motif	TGACG	787	5	+	Hordeum vulgare	cis-acting regulatory element involved in the MeJA-responsiveness
ScSPL19	TGACG-motif	TGACG	1162	5	-	Hordeum vulgare	cis-acting regulatory element involved in the MeJA-responsiveness
ScSPL19	TGACG-motif	TGACG	1863	5	-	Hordeum vulgare	cis-acting regulatory element involved in the MeJA-responsiveness
ScSPL19	MYC	CATGTG	460	6	+	Arabidopsis thaliana
ScSPL19	MYC	CATTTG	674	6	+	Arabidopsis thaliana
ScSPL19	MYC	CATGTG	901	6	-	Arabidopsis thaliana
ScSPL19	MYC	CATTTG	1077	6	+	Arabidopsis thaliana
ScSPL19	MYC	CATTTG	1103	6	+	Arabidopsis thaliana
ScSPL19	MYC	CATGTG	1824	6	+	Arabidopsis thaliana
ScSPL19	A-box	CCGTCC	1499	6	+	Petroselinum crispum	sequence conserved in alpha-amylase promoters
ScSPL19	Pc-CMA2c	GCCCACGCA	1855	9	-	Pisum sativum
ScSPL19	TATA	TATAAAAT	534	8	-	Arabidopsis thaliana
ScSPL19	OCT	CGCGGATC	1753	8	-	Zea mays
ScSPL19	OCT	CGCGGATC	1845	8	-	Zea mays
ScSPL19	Myc	TCTCTTA	333	7	+	Arabidopsis thaliana
ScSPL19	Myc	TCTCTTA	767	7	+	Arabidopsis thaliana
ScSPL19	Myc	TCTCTTA	1188	7	+	Arabidopsis thaliana
ScSPL19	AT~TATA-box	TATATA	91	6	+	Arabidopsis thaliana
ScSPL19	AT~TATA-box	TATATAAA	954	8	-	Arabidopsis thaliana
ScSPL19	AT~TATA-box	TATATA	956	6	+	Arabidopsis thaliana
ScSPL19	AT~TATA-box	TATATA	1339	6	-	Arabidopsis thaliana
ScSPL19	LTR	CCGAAA	318	6	+	Hordeum vulgare	cis-acting element involved in low-temperature responsiveness
ScSPL19	LTR	CCGAAA	752	6	+	Hordeum vulgare	cis-acting element involved in low-temperature responsiveness
ScSPL19	LTR	CCGAAA	1173	6	+	Hordeum vulgare	cis-acting element involved in low-temperature responsiveness
ScSPL19	W box	TTGACC	126	6	+	Arabidopsis thaliana
ScSPL19	W box	TTGACC	397	6	+	Arabidopsis thaliana
ScSPL19	W box	TTGACC	624	6	-	Arabidopsis thaliana
ScSPL19	W box	TTGACC	832	6	+	Arabidopsis thaliana
ScSPL19	W box	TTGACC	991	6	+	Arabidopsis thaliana
ScSPL19	W box	TTGACC	1254	6	+	Arabidopsis thaliana
ScSPL19	as-1	TGACG	75	5	-	Arabidopsis thaliana
ScSPL19	as-1	TGACG	152	5	-	Arabidopsis thaliana
ScSPL19	as-1	TGACG	246	5	-	Arabidopsis thaliana
ScSPL19	as-1	TGACG	353	5	+	Arabidopsis thaliana
ScSPL19	as-1	TGACG	384	5	+	Arabidopsis thaliana
ScSPL19	as-1	TGACG	681	5	-	Arabidopsis thaliana
ScSPL19	as-1	TGACG	741	5	-	Arabidopsis thaliana
ScSPL19	as-1	TGACG	787	5	+	Arabidopsis thaliana
ScSPL19	as-1	TGACG	1162	5	-	Arabidopsis thaliana
ScSPL19	as-1	TGACG	1863	5	-	Arabidopsis thaliana
ScSPL19	Unnamed__1	CGTGG	304	5	-	Zea mays
ScSPL19	Unnamed__1	CGTGG	487	5	+	Zea mays
ScSPL19	Unnamed__1	CGTGG	738	5	-	Zea mays
ScSPL19	Unnamed__1	CGTGG	943	5	+	Zea mays
ScSPL19	Unnamed__1	CGTGG	1857	5	+	Zea mays
ScSPL19	Unnamed__1	CGTGG	1988	5	+	Zea mays
ScSPL19	TCT-motif	TCTTAC	335	6	+	Arabidopsis thaliana	part of a light responsive element
ScSPL19	TCT-motif	TCTTAC	769	6	+	Arabidopsis thaliana	part of a light responsive element
ScSPL19	TCT-motif	TCTTAC	1190	6	+	Arabidopsis thaliana	part of a light responsive element
ScSPL19	MYB recognition site	CCGTTG	1232	6	-	Arabidopsis thaliana
ScSPL19	CCGTCC motif	CCGTCC	1499	6	+	Nicotiana tabacum
ScSPL19	Sp1	GGGCGG	1058	6	-	Oryza sativa	light responsive element
ScSPL19	Sp1	GGGCGG	1701	6	-	Oryza sativa	light responsive element
ScSPL19	Sp1	GGGCGG	1714	6	-	Oryza sativa	light responsive element
ScSPL19	Sp1	GGGCGG	1735	6	-	Oryza sativa	light responsive element
ScSPL19	Sp1	GGGCGG	1884	6	+	Oryza sativa	light responsive element
ScSPL19	TATA-box	TATATA	91	6	+	Arabidopsis thaliana	core promoter element around -30 of transcription start
ScSPL19	TATA-box	TATA	93	4	+	Arabidopsis thaliana	core promoter element around -30 of transcription start
ScSPL19	TATA-box	TATAAA	104	6	-	Helianthus annuus	core promoter element around -30 of transcription start
ScSPL19	TATA-box	TATAA	105	5	-	Arabidopsis thaliana	core promoter element around -30 of transcription start
ScSPL19	TATA-box	TATA	106	4	+	Arabidopsis thaliana	core promoter element around -30 of transcription start
ScSPL19	TATA-box	TATA	277	4	+	Arabidopsis thaliana	core promoter element around -30 of transcription start
ScSPL19	TATA-box	TATA	525	4	+	Arabidopsis thaliana	core promoter element around -30 of transcription start
ScSPL19	TATA-box	TATAAAA	535	7	-	Pisum sativum	core promoter element around -30 of transcription start
ScSPL19	TATA-box	TATAAA	536	6	-	Helianthus annuus	core promoter element around -30 of transcription start
ScSPL19	TATA-box	TATAA	537	5	-	Arabidopsis thaliana	core promoter element around -30 of transcription start
ScSPL19	TATA-box	TATA	538	4	+	Arabidopsis thaliana	core promoter element around -30 of transcription start
ScSPL19	TATA-box	TATA	711	4	+	Arabidopsis thaliana	core promoter element around -30 of transcription start
ScSPL19	TATA-box	taTATAAAg	953	9	-	Lycopersicon esculentum	core promoter element around -30 of transcription start
ScSPL19	TATA-box	TATAAA	954	6	-	Helianthus annuus	core promoter element around -30 of transcription start
ScSPL19	TATA-box	TATATAA	955	7	-	Arabidopsis thaliana	core promoter element around -30 of transcription start
ScSPL19	TATA-box	TATATA	956	6	+	Arabidopsis thaliana	core promoter element around -30 of transcription start
ScSPL19	TATA-box	TATA	958	4	+	Arabidopsis thaliana	core promoter element around -30 of transcription start
ScSPL19	TATA-box	TATAA	970	5	-	Arabidopsis thaliana	core promoter element around -30 of transcription start
ScSPL19	TATA-box	TATA	971	4	+	Arabidopsis thaliana	core promoter element around -30 of transcription start
ScSPL19	TATA-box	TATA	1132	4	-	Arabidopsis thaliana	core promoter element around -30 of transcription start
ScSPL19	TATA-box	ATATAT	1338	6	-	Brassica napus	core promoter element around -30 of transcription start
ScSPL19	TATA-box	TATATA	1339	6	-	Arabidopsis thaliana	core promoter element around -30 of transcription start
ScSPL19	TATA-box	ATATAA	1340	6	+	Brassica oleracea	core promoter element around -30 of transcription start
ScSPL19	TATA-box	TATA	1341	4	-	Arabidopsis thaliana	core promoter element around -30 of transcription start
ScSPL19	GC-motif	CCCCCG	1669	6	+	Zea mays
ScSPL19	ABRE	ACGTG	150	5	-	Arabidopsis thaliana	cis-acting element involved in the abscisic acid responsiveness
ScSPL19	ABRE	CACGTG	155	6	+	Arabidopsis thaliana	cis-acting element involved in the abscisic acid responsiveness
ScSPL19	ABRE	ACGTG	156	5	+	Arabidopsis thaliana	cis-acting element involved in the abscisic acid responsiveness
ScSPL19	ABRE	ACGTG	739	5	-	Arabidopsis thaliana	cis-acting element involved in the abscisic acid responsiveness
ScSPL19	ABRE	ACGTG	1866	5	-	Arabidopsis thaliana	cis-acting element involved in the abscisic acid responsiveness
ScSPL19	STRE	AGGGG	1061	5	-	Arabidopsis thaliana
ScSPL19	STRE	AGGGG	1201	5	-	Arabidopsis thaliana
ScSPL19	STRE	AGGGG	1399	5	-	Arabidopsis thaliana
ScSPL19	STRE	AGGGG	1548	5	-	Arabidopsis thaliana
ScSPL19	STRE	AGGGG	1566	5	-	Arabidopsis thaliana
ScSPL19	STRE	AGGGG	1891	5	+	Arabidopsis thaliana
ScSPL19	I-box	atGATAAGGTC	1290	10	-	Helianthus annuus	part of a light responsive element
ScSPL19	MYB	CAACCA	263	6	+	Arabidopsis thaliana
ScSPL19	MYB	CAACCA	698	6	+	Arabidopsis thaliana
ScSPL19	MYB	CAACCA	878	6	-	Arabidopsis thaliana
ScSPL19	MYB	CAACCA	1118	6	+	Arabidopsis thaliana
ScSPL19	AE-box	AGAAACTT	756	8	-	Arabidopsis thaliana	part of a module for light response
ScSPL19	G-Box	CACGTG	155	6	+	Pisum sativum	cis-acting regulatory element involved in light responsiveness
ScSPL19	G-Box	CACGTT	1866	6	+	Pisum sativum	cis-acting regulatory element involved in light responsiveness
ScSPL19	CCGTCC-box	CCGTCC	1499	6	+	Petroselinum hortense
ScSPL19	CCAAT-box	CAACGG	1232	6	+	Hordeum vulgare
ScSPL19	CAAT-box	CAAAT	124	5	-	Pisum sativum	common cis-acting element in promoter and enhancer regions
ScSPL19	CAAT-box	CAAT	145	4	+	Nicotiana glutinosa	common cis-acting element in promoter and enhancer regions
ScSPL19	CAAT-box	CAAAT	236	5	+	Pisum sativum	common cis-acting element in promoter and enhancer regions
ScSPL19	CAAT-box	CAAT	271	4	+	Nicotiana glutinosa	common cis-acting element in promoter and enhancer regions
ScSPL19	CAAT-box	TGCCAAC	436	7	-	Petunia hybrida	common cis-acting element in promoter and enhancer regions
ScSPL19	CAAT-box	CAAT	562	4	+	Nicotiana glutinosa	common cis-acting element in promoter and enhancer regions
ScSPL19	CAAT-box	CAAT	577	4	+	Nicotiana glutinosa	common cis-acting element in promoter and enhancer regions
ScSPL19	CAAT-box	CAAAT	675	5	-	Pisum sativum	common cis-acting element in promoter and enhancer regions
ScSPL19	CAAT-box	CAAT	885	4	-	Nicotiana glutinosa	common cis-acting element in promoter and enhancer regions
ScSPL19	CAAT-box	CAAT	1010	4	+	Nicotiana glutinosa	common cis-acting element in promoter and enhancer regions
ScSPL19	CAAT-box	CCAAT	1031	5	+	Arabidopsis thaliana	common cis-acting element in promoter and enhancer regions
ScSPL19	CAAT-box	CAAT	1032	4	+	Nicotiana glutinosa	common cis-acting element in promoter and enhancer regions
ScSPL19	CAAT-box	CAAAT	1078	5	-	Pisum sativum	common cis-acting element in promoter and enhancer regions
ScSPL19	CAAT-box	CAAAT	1104	5	-	Pisum sativum	common cis-acting element in promoter and enhancer regions
ScSPL19	CAAT-box	CAAT	1392	4	+	Nicotiana glutinosa	common cis-acting element in promoter and enhancer regions
ScSPL19	CAAT-box	CAAAT	1450	5	+	Pisum sativum	common cis-acting element in promoter and enhancer regions
ScSPL19	CAAT-box	CAAAT	1453	5	-	Pisum sativum	common cis-acting element in promoter and enhancer regions
ScSPL19	CAAT-box	CAAAT	1630	5	+	Pisum sativum	common cis-acting element in promoter and enhancer regions
ScSPL2	GATA-motif	AAGGATAAGG	1721	9	+	Solanum tuberosum	part of a light responsive element
ScSPL2	TCT-motif	TCTTAC	283	6	-	Arabidopsis thaliana	part of a light responsive element
ScSPL2	MYB recognition site	CCGTTG	229	6	+	Arabidopsis thaliana
ScSPL2	MYB recognition site	CCGTTG	578	6	-	Arabidopsis thaliana
ScSPL2	MYB recognition site	CCGTTG	1808	6	-	Arabidopsis thaliana
ScSPL2	CCGTCC motif	CCGTCC	141	6	+	Nicotiana tabacum
ScSPL2	CCGTCC motif	CCGTCC	1211	6	-	Nicotiana tabacum
ScSPL2	TATA-box	ATATAA	151	6	+	Brassica oleracea	core promoter element around -30 of transcription start
ScSPL2	TATA-box	TATA	152	4	+	Arabidopsis thaliana	core promoter element around -30 of transcription start
ScSPL2	TATA-box	TATAAGAA	191	8	-	Zea mays	core promoter element around -30 of transcription start
ScSPL2	TATA-box	TATAA	194	5	-	Arabidopsis thaliana	core promoter element around -30 of transcription start
ScSPL2	TATA-box	TATA	195	4	+	Arabidopsis thaliana	core promoter element around -30 of transcription start
ScSPL2	TATA-box	TATA	1669	4	-	Arabidopsis thaliana	core promoter element around -30 of transcription start
ScSPL2	GC-motif	CCCCCG	1354	6	+	Zea mays
ScSPL2	GC-motif	CCCCCG	1661	6	-	Zea mays
ScSPL2	CAT-box	GCCACT	1771	6	+	Arabidopsis thaliana	cis-acting regulatory element related to meristem expression
ScSPL2	WRE3	CCACCT	1168	6	+	Pisum sativum
ScSPL2	WRE3	CCACCT	1887	6	+	Pisum sativum
ScSPL2	WRE3	CCACCT	1905	6	+	Pisum sativum
ScSPL2	MSA-like	(T/C)C(T/C)AACGG(T/C)(T/C)A	226	8	-	Catharanthus roseus	cis-acting element involved in cell cycle regulation
ScSPL2	MYB	CAACCA	493	6	-	Arabidopsis thaliana
ScSPL2	MYB	CAACCA	725	6	+	Arabidopsis thaliana
ScSPL2	MYB	CAACCA	1690	6	+	Arabidopsis thaliana
ScSPL2	MYB	TAACCA	1884	6	+	Arabidopsis thaliana
ScSPL2	MYB	CAACCA	1968	6	+	Arabidopsis thaliana
ScSPL2	G-Box	CACGTG	501	6	+	Pisum sativum	cis-acting regulatory element involved in light responsiveness
ScSPL2	G-Box	CACGTG	1550	6	-	Pisum sativum	cis-acting regulatory element involved in light responsiveness
ScSPL2	RY-element	CATGCATG	1646	8	-	Helianthus annuus
ScSPL2	AE-box	AGAAACAA	720	8	+	Arabidopsis thaliana	part of a module for light response
ScSPL2	ABRE	CACGTG	501	6	+	Arabidopsis thaliana	cis-acting element involved in the abscisic acid responsiveness
ScSPL2	ABRE	ACGTG	502	5	+	Arabidopsis thaliana	cis-acting element involved in the abscisic acid responsiveness
ScSPL2	ABRE	ACGTG	606	5	+	Arabidopsis thaliana	cis-acting element involved in the abscisic acid responsiveness
ScSPL2	ABRE	ACGTG	1253	5	-	Arabidopsis thaliana	cis-acting element involved in the abscisic acid responsiveness
ScSPL2	ABRE	ACGTG	1334	5	+	Arabidopsis thaliana	cis-acting element involved in the abscisic acid responsiveness
ScSPL2	ABRE	CACGTG	1550	6	-	Arabidopsis thaliana	cis-acting element involved in the abscisic acid responsiveness
ScSPL2	ABRE	ACGTG	1551	5	+	Arabidopsis thaliana	cis-acting element involved in the abscisic acid responsiveness
ScSPL2	STRE	AGGGG	909	5	-	Arabidopsis thaliana
ScSPL2	3-AF1 binding site	TAAGAGAGGAA	252	10	+	Solanum tuberosum
ScSPL2	P-box	CCTTTTG	708	7	-	Oryza sativa	gibberellin-responsive element
ScSPL2	P-box	CCTTTTG	1511	7	-	Oryza sativa	gibberellin-responsive element
ScSPL2	CCAAT-box	CAACGG	229	6	-	Hordeum vulgare
ScSPL2	CCAAT-box	CAACGG	578	6	+	Hordeum vulgare
ScSPL2	CCAAT-box	CAACGG	1808	6	+	Hordeum vulgare
ScSPL2	CAAT-box	CAAAT	22	5	+	Pisum sativum	common cis-acting element in promoter and enhancer regions
ScSPL2	CAAT-box	CAAT	149	4	+	Nicotiana glutinosa	common cis-acting element in promoter and enhancer regions
ScSPL2	CAAT-box	CAAT	224	4	-	Nicotiana glutinosa	common cis-acting element in promoter and enhancer regions
ScSPL2	CAAT-box	CAAT	272	4	-	Nicotiana glutinosa	common cis-acting element in promoter and enhancer regions
ScSPL2	CAAT-box	CAAAT	395	5	+	Pisum sativum	common cis-acting element in promoter and enhancer regions
ScSPL2	CAAT-box	CCAAT	641	5	+	Arabidopsis thaliana	common cis-acting element in promoter and enhancer regions
ScSPL2	CAAT-box	CAAT	642	4	+	Nicotiana glutinosa	common cis-acting element in promoter and enhancer regions
ScSPL2	CAAT-box	CAAAT	655	5	+	Pisum sativum	common cis-acting element in promoter and enhancer regions
ScSPL2	CAAT-box	CAAT	688	4	-	Nicotiana glutinosa	common cis-acting element in promoter and enhancer regions
ScSPL2	CAAT-box	CCAAT	805	5	-	Arabidopsis thaliana	common cis-acting element in promoter and enhancer regions
ScSPL2	CAAT-box	CAAAT	849	5	-	Pisum sativum	common cis-acting element in promoter and enhancer regions
ScSPL2	CAAT-box	CAAT	859	4	-	Nicotiana glutinosa	common cis-acting element in promoter and enhancer regions
ScSPL2	CAAT-box	CCAAT	954	5	+	Arabidopsis thaliana	common cis-acting element in promoter and enhancer regions
ScSPL2	CAAT-box	CAAT	955	4	+	Nicotiana glutinosa	common cis-acting element in promoter and enhancer regions
ScSPL2	CAAT-box	CAAT	1054	4	-	Nicotiana glutinosa	common cis-acting element in promoter and enhancer regions
ScSPL2	CAAT-box	CCAAT	1248	5	+	Arabidopsis thaliana	common cis-acting element in promoter and enhancer regions
ScSPL2	CAAT-box	CAAT	1249	4	+	Nicotiana glutinosa	common cis-acting element in promoter and enhancer regions
ScSPL2	CAAT-box	CAAAT	1418	5	+	Pisum sativum	common cis-acting element in promoter and enhancer regions
ScSPL2	CAAT-box	CAAAT	1476	5	-	Pisum sativum	common cis-acting element in promoter and enhancer regions
ScSPL2	CAAT-box	CAAT	1621	4	+	Nicotiana glutinosa	common cis-acting element in promoter and enhancer regions
ScSPL2	CAAT-box	CAAT	1803	4	-	Nicotiana glutinosa	common cis-acting element in promoter and enhancer regions
ScSPL2	CAAT-box	TGCCAAC	1805	7	+	Petunia hybrida	common cis-acting element in promoter and enhancer regions
ScSPL2	CCGTCC-box	CCGTCC	141	6	+	Petroselinum hortense
ScSPL2	CCGTCC-box	CCGTCC	1211	6	-	Petroselinum hortense
ScSPL2	TCCC-motif	TCTCCCT	1874	7	+	Spinacia oleracea	part of a light responsive element
ScSPL2	Myb	CAACTG	1100	6	-	Arabidopsis thaliana
ScSPL2	CGTCA-motif	CGTCA	893	5	+	Hordeum vulgare	cis-acting regulatory element involved in the MeJA-responsiveness
ScSPL2	CGTCA-motif	CGTCA	1337	5	-	Hordeum vulgare	cis-acting regulatory element involved in the MeJA-responsiveness
ScSPL2	GT1-motif	GGTTAA	59	6	+	Arabidopsis thaliana	light responsive element
ScSPL2	GT1-motif	GGTTAA	1883	6	-	Arabidopsis thaliana	light responsive element
ScSPL2	TGA-element	AACGAC	376	6	-	Brassica oleracea	auxin-responsive element
ScSPL2	TGA-element	AACGAC	1432	6	-	Brassica oleracea	auxin-responsive element
ScSPL2	TGACG-motif	TGACG	893	5	-	Hordeum vulgare	cis-acting regulatory element involved in the MeJA-responsiveness
ScSPL2	TGACG-motif	TGACG	1337	5	+	Hordeum vulgare	cis-acting regulatory element involved in the MeJA-responsiveness
ScSPL2	G-box	CACGTG	501	6	+	Arabidopsis thaliana	cis-acting regulatory element involved in light responsiveness
ScSPL2	G-box	CACGTC	605	6	-	Zea mays	cis-acting regulatory element involved in light responsiveness
ScSPL2	G-box	CACGAC	960	6	-	Zea mays	cis-acting regulatory element involved in light responsiveness
ScSPL2	G-box	CACGTC	1253	6	+	Zea mays	cis-acting regulatory element involved in light responsiveness
ScSPL2	G-box	CACGTC	1333	6	-	Zea mays	cis-acting regulatory element involved in light responsiveness
ScSPL2	G-box	CACGTG	1550	6	-	Arabidopsis thaliana	cis-acting regulatory element involved in light responsiveness
ScSPL2	MYB-like sequence	TAACCA	1884	6	+	Arabidopsis thaliana
ScSPL2	Unnamed__4	CTCC	19	4	+	Petroselinum hortense
ScSPL2	Unnamed__4	CTCC	135	4	+	Petroselinum hortense
ScSPL2	Unnamed__4	CTCC	139	4	+	Petroselinum hortense
ScSPL2	Unnamed__4	CTCC	352	4	+	Petroselinum hortense
ScSPL2	Unnamed__4	CTCC	547	4	-	Petroselinum hortense
ScSPL2	Unnamed__4	CTCC	575	4	+	Petroselinum hortense
ScSPL2	Unnamed__4	CTCC	757	4	-	Petroselinum hortense
ScSPL2	Unnamed__4	CTCC	829	4	-	Petroselinum hortense
ScSPL2	Unnamed__4	CTCC	930	4	+	Petroselinum hortense
ScSPL2	Unnamed__4	CTCC	1025	4	+	Petroselinum hortense
ScSPL2	Unnamed__4	CTCC	1058	4	+	Petroselinum hortense
ScSPL2	Unnamed__4	CTCC	1066	4	-	Petroselinum hortense
ScSPL2	Unnamed__4	CTCC	1072	4	-	Petroselinum hortense
ScSPL2	Unnamed__4	CTCC	1124	4	+	Petroselinum hortense
ScSPL2	Unnamed__4	CTCC	1127	4	+	Petroselinum hortense
ScSPL2	Unnamed__4	CTCC	1142	4	+	Petroselinum hortense
ScSPL2	Unnamed__4	CTCC	1145	4	+	Petroselinum hortense
ScSPL2	Unnamed__4	CTCC	1148	4	+	Petroselinum hortense
ScSPL2	Unnamed__4	CTCC	1151	4	+	Petroselinum hortense
ScSPL2	Unnamed__4	CTCC	1154	4	+	Petroselinum hortense
ScSPL2	Unnamed__4	CTCC	1157	4	+	Petroselinum hortense
ScSPL2	Unnamed__4	CTCC	1160	4	+	Petroselinum hortense
ScSPL2	Unnamed__4	CTCC	1166	4	+	Petroselinum hortense
ScSPL2	Unnamed__4	CTCC	1172	4	+	Petroselinum hortense
ScSPL2	Unnamed__4	CTCC	1175	4	+	Petroselinum hortense
ScSPL2	Unnamed__4	CTCC	1197	4	-	Petroselinum hortense
ScSPL2	Unnamed__4	CTCC	1275	4	-	Petroselinum hortense
ScSPL2	Unnamed__4	CTCC	1352	4	+	Petroselinum hortense
ScSPL2	Unnamed__4	CTCC	1505	4	-	Petroselinum hortense
ScSPL2	Unnamed__4	CTCC	1682	4	+	Petroselinum hortense
ScSPL2	Unnamed__4	CTCC	1723	4	-	Petroselinum hortense
ScSPL2	Unnamed__4	CTCC	1775	4	+	Petroselinum hortense
ScSPL2	Unnamed__4	CTCC	1832	4	+	Petroselinum hortense
ScSPL2	Unnamed__4	CTCC	1835	4	+	Petroselinum hortense
ScSPL2	Unnamed__4	CTCC	1842	4	+	Petroselinum hortense
ScSPL2	Unnamed__4	CTCC	1867	4	+	Petroselinum hortense
ScSPL2	Unnamed__4	CTCC	1875	4	+	Petroselinum hortense
ScSPL2	Unnamed__4	CTCC	1900	4	+	Petroselinum hortense
ScSPL2	DRE core	GCCGAC	1243	6	-	Arabidopsis thaliana
ScSPL2	MBS	CAACTG	1100	6	-	Arabidopsis thaliana	MYB binding site involved in drought-inducibility
ScSPL2	A-box	CCGTCC	141	6	+	Petroselinum crispum	sequence conserved in alpha-amylase promoters
ScSPL2	A-box	CCGTCC	1211	6	-	Petroselinum crispum	sequence conserved in alpha-amylase promoters
ScSPL2	W box	TTGACC	225	6	+	Arabidopsis thaliana
ScSPL2	as-1	TGACG	893	5	-	Arabidopsis thaliana
ScSPL2	as-1	TGACG	1337	5	+	Arabidopsis thaliana
ScSPL2	Unnamed__1	CGTGG	780	5	+	Zea mays
ScSPL2	Unnamed__1	CGTGG	1693	5	-	Zea mays
ScSPL2	dOCT	CACGGATC	1483	8	-	Zea mays
ScSPL2	NON	CAACGGCCACG	1808	10	+	Nicotiana tabacum
ScSPL20	MBS	CAACTG	528	6	+	Arabidopsis thaliana	MYB binding site involved in drought-inducibility
ScSPL20	DRE core	GCCGAC	1614	6	+	Arabidopsis thaliana
ScSPL20	Unnamed__4	CTCC	97	4	-	Petroselinum hortense
ScSPL20	Unnamed__4	CTCC	337	4	+	Petroselinum hortense
ScSPL20	Unnamed__4	CTCC	771	4	+	Petroselinum hortense
ScSPL20	Unnamed__4	CTCC	1117	4	+	Petroselinum hortense
ScSPL20	Unnamed__4	CTCC	1247	4	+	Petroselinum hortense
ScSPL20	Unnamed__4	CTCC	1278	4	+	Petroselinum hortense
ScSPL20	Unnamed__4	CTCC	1290	4	+	Petroselinum hortense
ScSPL20	Unnamed__4	CTCC	1298	4	+	Petroselinum hortense
ScSPL20	Unnamed__4	CTCC	1308	4	+	Petroselinum hortense
ScSPL20	Unnamed__4	CTCC	1316	4	+	Petroselinum hortense
ScSPL20	Unnamed__4	CTCC	1324	4	+	Petroselinum hortense
ScSPL20	Unnamed__4	CTCC	1339	4	+	Petroselinum hortense
ScSPL20	Unnamed__4	CTCC	1356	4	+	Petroselinum hortense
ScSPL20	Unnamed__4	CTCC	1381	4	-	Petroselinum hortense
ScSPL20	Unnamed__4	CTCC	1400	4	+	Petroselinum hortense
ScSPL20	Unnamed__4	CTCC	1405	4	-	Petroselinum hortense
ScSPL20	Unnamed__4	CTCC	1463	4	+	Petroselinum hortense
ScSPL20	Unnamed__4	CTCC	1606	4	-	Petroselinum hortense
ScSPL20	Unnamed__4	CTCC	1625	4	+	Petroselinum hortense
ScSPL20	Unnamed__4	CTCC	1632	4	+	Petroselinum hortense
ScSPL20	Unnamed__4	CTCC	1651	4	+	Petroselinum hortense
ScSPL20	Unnamed__4	CTCC	1665	4	-	Petroselinum hortense
ScSPL20	Unnamed__4	CTCC	1710	4	-	Petroselinum hortense
ScSPL20	Unnamed__4	CTCC	1720	4	-	Petroselinum hortense
ScSPL20	Unnamed__4	CTCC	1760	4	-	Petroselinum hortense
ScSPL20	Unnamed__4	CTCC	1833	4	-	Petroselinum hortense
ScSPL20	Unnamed__4	CTCC	1869	4	+	Petroselinum hortense
ScSPL20	G-box	CACGTC	459	6	+	Zea mays	cis-acting regulatory element involved in light responsiveness
ScSPL20	TGACG-motif	TGACG	70	5	+	Hordeum vulgare	cis-acting regulatory element involved in the MeJA-responsiveness
ScSPL20	TGACG-motif	TGACG	101	5	+	Hordeum vulgare	cis-acting regulatory element involved in the MeJA-responsiveness
ScSPL20	TGACG-motif	TGACG	400	5	-	Hordeum vulgare	cis-acting regulatory element involved in the MeJA-responsiveness
ScSPL20	TGACG-motif	TGACG	461	5	-	Hordeum vulgare	cis-acting regulatory element involved in the MeJA-responsiveness
ScSPL20	TGACG-motif	TGACG	508	5	+	Hordeum vulgare	cis-acting regulatory element involved in the MeJA-responsiveness
ScSPL20	TGACG-motif	TGACG	540	5	+	Hordeum vulgare	cis-acting regulatory element involved in the MeJA-responsiveness
ScSPL20	TGACG-motif	TGACG	1580	5	-	Hordeum vulgare	cis-acting regulatory element involved in the MeJA-responsiveness
ScSPL20	AuxRR-core	GGTCCAT	949	7	+	Nicotiana tabacum	cis-acting regulatory element involved in auxin responsiveness
ScSPL20	TGA-element	AACGAC	1442	6	-	Brassica oleracea	auxin-responsive element
ScSPL20	TGA-element	AACGAC	1674	6	-	Brassica oleracea	auxin-responsive element
ScSPL20	CGTCA-motif	CGTCA	70	5	-	Hordeum vulgare	cis-acting regulatory element involved in the MeJA-responsiveness
ScSPL20	CGTCA-motif	CGTCA	101	5	-	Hordeum vulgare	cis-acting regulatory element involved in the MeJA-responsiveness
ScSPL20	CGTCA-motif	CGTCA	400	5	+	Hordeum vulgare	cis-acting regulatory element involved in the MeJA-responsiveness
ScSPL20	CGTCA-motif	CGTCA	461	5	+	Hordeum vulgare	cis-acting regulatory element involved in the MeJA-responsiveness
ScSPL20	CGTCA-motif	CGTCA	508	5	-	Hordeum vulgare	cis-acting regulatory element involved in the MeJA-responsiveness
ScSPL20	CGTCA-motif	CGTCA	540	5	-	Hordeum vulgare	cis-acting regulatory element involved in the MeJA-responsiveness
ScSPL20	CGTCA-motif	CGTCA	1580	5	+	Hordeum vulgare	cis-acting regulatory element involved in the MeJA-responsiveness
ScSPL20	ARE	AAACCA	314	6	+	Zea mays	cis-acting regulatory element essential for the anaerobic induction
ScSPL20	Myb	CAACTG	528	6	+	Arabidopsis thaliana
ScSPL20	Box II -like sequence	TCCGTGTACCA	168	10	+	Oryza sativa
ScSPL20	LTR	CCGAAA	35	6	+	Hordeum vulgare	cis-acting element involved in low-temperature responsiveness
ScSPL20	LTR	CCGAAA	472	6	+	Hordeum vulgare	cis-acting element involved in low-temperature responsiveness
ScSPL20	LTR	CCGAAA	894	6	+	Hordeum vulgare	cis-acting element involved in low-temperature responsiveness
ScSPL20	Unnamed__1	CGTGG	21	5	-	Zea mays
ScSPL20	Unnamed__1	CGTGG	204	5	+	Zea mays
ScSPL20	Unnamed__1	CGTGG	458	5	-	Zea mays
ScSPL20	Unnamed__1	CGTGG	1574	5	+	Zea mays
ScSPL20	Unnamed__1	CGTGG	1705	5	+	Zea mays
ScSPL20	Unnamed__1	CGTGG	1860	5	-	Zea mays
ScSPL20	as-1	TGACG	70	5	+	Arabidopsis thaliana
ScSPL20	as-1	TGACG	101	5	+	Arabidopsis thaliana
ScSPL20	as-1	TGACG	400	5	-	Arabidopsis thaliana
ScSPL20	as-1	TGACG	461	5	-	Arabidopsis thaliana
ScSPL20	as-1	TGACG	508	5	+	Arabidopsis thaliana
ScSPL20	as-1	TGACG	540	5	+	Arabidopsis thaliana
ScSPL20	as-1	TGACG	1580	5	-	Arabidopsis thaliana
ScSPL20	W box	TTGACC	114	6	+	Arabidopsis thaliana
ScSPL20	W box	TTGACC	343	6	-	Arabidopsis thaliana
ScSPL20	W box	TTGACC	553	6	+	Arabidopsis thaliana
ScSPL20	W box	TTGACC	712	6	+	Arabidopsis thaliana
ScSPL20	W box	TTGACC	829	6	-	Arabidopsis thaliana
ScSPL20	W box	TTGACC	975	6	+	Arabidopsis thaliana
ScSPL20	Pc-CMA2c	GCCCACGCA	1572	9	-	Pisum sativum
ScSPL20	A-box	CCGTCC	1220	6	+	Petroselinum crispum	sequence conserved in alpha-amylase promoters
ScSPL20	MYC	CATTTG	393	6	+	Arabidopsis thaliana
ScSPL20	MYC	CATTTG	798	6	+	Arabidopsis thaliana
ScSPL20	MYC	CATTTG	824	6	+	Arabidopsis thaliana
ScSPL20	MYC	CATGTG	1541	6	+	Arabidopsis thaliana
ScSPL20	AT~TATA-box	TATATA	677	6	+	Arabidopsis thaliana
ScSPL20	AT~TATA-box	TATATA	1060	6	-	Arabidopsis thaliana
ScSPL20	Myc	TCTCTTA	50	7	+	Arabidopsis thaliana
ScSPL20	Myc	TCTCTTA	487	7	+	Arabidopsis thaliana
ScSPL20	Myc	TCTCTTA	909	7	+	Arabidopsis thaliana
ScSPL20	HD-Zip 1	CAAT(A/T)ATTG	1825	8	-	Arabidopsis thaliana	element involved in differentiation of the palisade mesophyll cells
ScSPL20	OCT	CGCGGATC	1470	8	-	Zea mays
ScSPL20	OCT	CGCGGATC	1562	8	-	Zea mays
ScSPL20	TATA	TATAAAAT	253	8	-	Arabidopsis thaliana
ScSPL20	WRE3	CCACCT	570	6	+	Pisum sativum
ScSPL20	WRE3	CCACCT	1750	6	+	Pisum sativum
ScSPL20	TATA-box	TATA	242	4	+	Arabidopsis thaliana	core promoter element around -30 of transcription start
ScSPL20	TATA-box	TATAAAA	254	7	-	Pisum sativum	core promoter element around -30 of transcription start
ScSPL20	TATA-box	TATAAA	255	6	-	Helianthus annuus	core promoter element around -30 of transcription start
ScSPL20	TATA-box	TATAA	256	5	-	Arabidopsis thaliana	core promoter element around -30 of transcription start
ScSPL20	TATA-box	TATA	257	4	+	Arabidopsis thaliana	core promoter element around -30 of transcription start
ScSPL20	TATA-box	TATA	431	4	+	Arabidopsis thaliana	core promoter element around -30 of transcription start
ScSPL20	TATA-box	TATATA	677	6	+	Arabidopsis thaliana	core promoter element around -30 of transcription start
ScSPL20	TATA-box	TATA	679	4	+	Arabidopsis thaliana	core promoter element around -30 of transcription start
ScSPL20	TATA-box	TATAA	691	5	-	Arabidopsis thaliana	core promoter element around -30 of transcription start
ScSPL20	TATA-box	TATA	692	4	+	Arabidopsis thaliana	core promoter element around -30 of transcription start
ScSPL20	TATA-box	TATA	853	4	+	Arabidopsis thaliana	core promoter element around -30 of transcription start
ScSPL20	TATA-box	ATATAT	1059	6	-	Brassica napus	core promoter element around -30 of transcription start
ScSPL20	TATA-box	TATATA	1060	6	-	Arabidopsis thaliana	core promoter element around -30 of transcription start
ScSPL20	TATA-box	ATATAA	1061	6	+	Brassica oleracea	core promoter element around -30 of transcription start
ScSPL20	TATA-box	TATA	1062	4	-	Arabidopsis thaliana	core promoter element around -30 of transcription start
ScSPL20	GC-motif	CCCCCG	1386	6	+	Zea mays
ScSPL20	Sp1	GGGCGG	779	6	-	Oryza sativa	light responsive element
ScSPL20	Sp1	GGGCGG	1418	6	-	Oryza sativa	light responsive element
ScSPL20	Sp1	GGGCGG	1431	6	-	Oryza sativa	light responsive element
ScSPL20	Sp1	GGGCGG	1452	6	-	Oryza sativa	light responsive element
ScSPL20	Sp1	GGGCGG	1601	6	+	Oryza sativa	light responsive element
ScSPL20	CCGTCC motif	CCGTCC	1220	6	+	Nicotiana tabacum
ScSPL20	TCT-motif	TCTTAC	52	6	+	Arabidopsis thaliana	part of a light responsive element
ScSPL20	TCT-motif	TCTTAC	489	6	+	Arabidopsis thaliana	part of a light responsive element
ScSPL20	TCT-motif	TCTTAC	911	6	+	Arabidopsis thaliana	part of a light responsive element
ScSPL20	CCGTCC-box	CCGTCC	1220	6	+	Petroselinum hortense
ScSPL20	Unnamed__2	CCCCGG	1929	6	-	Zea mays
ScSPL20	CAAT-box	TGCCAAC	153	7	-	Petunia hybrida	common cis-acting element in promoter and enhancer regions
ScSPL20	CAAT-box	CAAT	281	4	+	Nicotiana glutinosa	common cis-acting element in promoter and enhancer regions
ScSPL20	CAAT-box	CAAT	296	4	+	Nicotiana glutinosa	common cis-acting element in promoter and enhancer regions
ScSPL20	CAAT-box	CAAAT	394	5	-	Pisum sativum	common cis-acting element in promoter and enhancer regions
ScSPL20	CAAT-box	CAAT	719	4	+	Nicotiana glutinosa	common cis-acting element in promoter and enhancer regions
ScSPL20	CAAT-box	CAAT	731	4	+	Nicotiana glutinosa	common cis-acting element in promoter and enhancer regions
ScSPL20	CAAT-box	CCAAT	752	5	+	Arabidopsis thaliana	common cis-acting element in promoter and enhancer regions
ScSPL20	CAAT-box	CAAT	753	4	+	Nicotiana glutinosa	common cis-acting element in promoter and enhancer regions
ScSPL20	CAAT-box	CAAAT	799	5	-	Pisum sativum	common cis-acting element in promoter and enhancer regions
ScSPL20	CAAT-box	CAAAT	825	5	-	Pisum sativum	common cis-acting element in promoter and enhancer regions
ScSPL20	CAAT-box	CAAAT	832	5	+	Pisum sativum	common cis-acting element in promoter and enhancer regions
ScSPL20	CAAT-box	CAAT	1113	4	+	Nicotiana glutinosa	common cis-acting element in promoter and enhancer regions
ScSPL20	CAAT-box	CAAAT	1171	5	+	Pisum sativum	common cis-acting element in promoter and enhancer regions
ScSPL20	CAAT-box	CAAAT	1174	5	-	Pisum sativum	common cis-acting element in promoter and enhancer regions
ScSPL20	CAAT-box	CAAAT	1347	5	+	Pisum sativum	common cis-acting element in promoter and enhancer regions
ScSPL20	CAAT-box	CAAT	1825	4	+	Nicotiana glutinosa	common cis-acting element in promoter and enhancer regions
ScSPL20	CAAT-box	CCAAT	1830	5	-	Arabidopsis thaliana	common cis-acting element in promoter and enhancer regions
ScSPL20	CAAT-box	CCAAT	1884	5	+	Arabidopsis thaliana	common cis-acting element in promoter and enhancer regions
ScSPL20	CAAT-box	CAAT	1885	4	+	Nicotiana glutinosa	common cis-acting element in promoter and enhancer regions
ScSPL20	CAAT-box	CAAT	1900	4	+	Nicotiana glutinosa	common cis-acting element in promoter and enhancer regions
ScSPL20	STRE	AGGGG	499	5	-	Arabidopsis thaliana
ScSPL20	STRE	AGGGG	782	5	-	Arabidopsis thaliana
ScSPL20	STRE	AGGGG	922	5	-	Arabidopsis thaliana
ScSPL20	STRE	AGGGG	1120	5	-	Arabidopsis thaliana
ScSPL20	STRE	AGGGG	1269	5	-	Arabidopsis thaliana
ScSPL20	STRE	AGGGG	1287	5	-	Arabidopsis thaliana
ScSPL20	STRE	AGGGG	1608	5	+	Arabidopsis thaliana
ScSPL20	ABRE	ACGTG	459	5	-	Arabidopsis thaliana	cis-acting element involved in the abscisic acid responsiveness
ScSPL20	ABRE	GCAACGTGTC	877	9	+	Hordeum vulgare	cis-acting element involved in the abscisic acid responsiveness
ScSPL20	ABRE	ACGTG	1583	5	-	Arabidopsis thaliana	cis-acting element involved in the abscisic acid responsiveness
ScSPL20	AE-box	AGAAACTT	476	8	-	Arabidopsis thaliana	part of a module for light response
ScSPL20	G-Box	CACGTT	1583	6	+	Pisum sativum	cis-acting regulatory element involved in light responsiveness
ScSPL20	MYB	CAACCA	417	6	+	Arabidopsis thaliana
ScSPL20	MYB	CAACCA	599	6	-	Arabidopsis thaliana
ScSPL20	MYB	CAACCA	839	6	+	Arabidopsis thaliana
ScSPL20	MYB	CAACCA	1989	6	-	Arabidopsis thaliana
ScSPL20	I-box	atGATAAGGTC	1011	10	-	Helianthus annuus	part of a light responsive element
ScSPL21	A-box	CCGTCC	39	6	+	Petroselinum crispum	sequence conserved in alpha-amylase promoters
ScSPL21	MYC	CATTTG	260	6	-	Arabidopsis thaliana
ScSPL21	TC-rich repeats	GTTTTCTTAC	1122	9	-	Nicotiana tabacum	cis-acting element involved in defense and stress responsiveness
ScSPL21	as-1	TGACG	412	5	-	Arabidopsis thaliana
ScSPL21	as-1	TGACG	434	5	+	Arabidopsis thaliana
ScSPL21	AC-II	CCACCAACCCCC	1335	11	+	Phaseolus vulgaris
ScSPL21	CGTCA-motif	CGTCA	412	5	+	Hordeum vulgare	cis-acting regulatory element involved in the MeJA-responsiveness
ScSPL21	CGTCA-motif	CGTCA	434	5	-	Hordeum vulgare	cis-acting regulatory element involved in the MeJA-responsiveness
ScSPL21	AAGAA-motif	GAAAGAA	532	7	+	Avena sativa
ScSPL21	Myb	CAACTG	48	6	+	Arabidopsis thaliana
ScSPL21	Myb	TAACTG	1887	6	-	Arabidopsis thaliana
ScSPL21	Unnamed__4	CTCC	80	4	-	Petroselinum hortense
ScSPL21	Unnamed__4	CTCC	239	4	+	Petroselinum hortense
ScSPL21	Unnamed__4	CTCC	321	4	+	Petroselinum hortense
ScSPL21	Unnamed__4	CTCC	373	4	-	Petroselinum hortense
ScSPL21	Unnamed__4	CTCC	551	4	-	Petroselinum hortense
ScSPL21	Unnamed__4	CTCC	598	4	-	Petroselinum hortense
ScSPL21	Unnamed__4	CTCC	620	4	-	Petroselinum hortense
ScSPL21	Unnamed__4	CTCC	632	4	-	Petroselinum hortense
ScSPL21	Unnamed__4	CTCC	664	4	-	Petroselinum hortense
ScSPL21	Unnamed__4	CTCC	687	4	-	Petroselinum hortense
ScSPL21	Unnamed__4	CTCC	709	4	-	Petroselinum hortense
ScSPL21	Unnamed__4	CTCC	730	4	-	Petroselinum hortense
ScSPL21	Unnamed__4	CTCC	739	4	-	Petroselinum hortense
ScSPL21	Unnamed__4	CTCC	779	4	-	Petroselinum hortense
ScSPL21	Unnamed__4	CTCC	787	4	-	Petroselinum hortense
ScSPL21	Unnamed__4	CTCC	827	4	-	Petroselinum hortense
ScSPL21	Unnamed__4	CTCC	838	4	-	Petroselinum hortense
ScSPL21	Unnamed__4	CTCC	862	4	-	Petroselinum hortense
ScSPL21	Unnamed__4	CTCC	873	4	-	Petroselinum hortense
ScSPL21	Unnamed__4	CTCC	882	4	-	Petroselinum hortense
ScSPL21	Unnamed__4	CTCC	913	4	-	Petroselinum hortense
ScSPL21	Unnamed__4	CTCC	921	4	-	Petroselinum hortense
ScSPL21	Unnamed__4	CTCC	972	4	-	Petroselinum hortense
ScSPL21	Unnamed__4	CTCC	981	4	-	Petroselinum hortense
ScSPL21	Unnamed__4	CTCC	997	4	-	Petroselinum hortense
ScSPL21	Unnamed__4	CTCC	1004	4	+	Petroselinum hortense
ScSPL21	Unnamed__4	CTCC	1033	4	-	Petroselinum hortense
ScSPL21	Unnamed__4	CTCC	1165	4	+	Petroselinum hortense
ScSPL21	Unnamed__4	CTCC	1227	4	+	Petroselinum hortense
ScSPL21	Unnamed__4	CTCC	1230	4	+	Petroselinum hortense
ScSPL21	Unnamed__4	CTCC	1306	4	+	Petroselinum hortense
ScSPL21	Unnamed__4	CTCC	1374	4	+	Petroselinum hortense
ScSPL21	Unnamed__4	CTCC	1380	4	+	Petroselinum hortense
ScSPL21	Unnamed__4	CTCC	1401	4	+	Petroselinum hortense
ScSPL21	Unnamed__4	CTCC	1405	4	+	Petroselinum hortense
ScSPL21	Unnamed__4	CTCC	1467	4	-	Petroselinum hortense
ScSPL21	Unnamed__4	CTCC	1491	4	+	Petroselinum hortense
ScSPL21	Unnamed__4	CTCC	1494	4	+	Petroselinum hortense
ScSPL21	Unnamed__4	CTCC	1525	4	+	Petroselinum hortense
ScSPL21	Unnamed__4	CTCC	1547	4	+	Petroselinum hortense
ScSPL21	Unnamed__4	CTCC	1598	4	+	Petroselinum hortense
ScSPL21	Unnamed__4	CTCC	1604	4	+	Petroselinum hortense
ScSPL21	Unnamed__4	CTCC	1690	4	+	Petroselinum hortense
ScSPL21	Unnamed__4	CTCC	1695	4	+	Petroselinum hortense
ScSPL21	Unnamed__4	CTCC	1699	4	+	Petroselinum hortense
ScSPL21	Unnamed__4	CTCC	1781	4	+	Petroselinum hortense
ScSPL21	Unnamed__4	CTCC	1843	4	-	Petroselinum hortense
ScSPL21	Unnamed__4	CTCC	1863	4	-	Petroselinum hortense
ScSPL21	MBS	CAACTG	48	6	+	Arabidopsis thaliana	MYB binding site involved in drought-inducibility
ScSPL21	DRE core	GCCGAC	1947	6	+	Arabidopsis thaliana
ScSPL21	TGACG-motif	TGACG	412	5	-	Hordeum vulgare	cis-acting regulatory element involved in the MeJA-responsiveness
ScSPL21	TGACG-motif	TGACG	434	5	+	Hordeum vulgare	cis-acting regulatory element involved in the MeJA-responsiveness
ScSPL21	O2-site	GATGACATGG	1201	9	-	Zea mays	cis-acting regulatory element involved in zein metabolism regulation
ScSPL21	ABRE	CGTACGTGCA	1743	9	-	Hordeum vulgare	cis-acting element involved in the abscisic acid responsiveness
ScSPL21	ABRE	ACGTG	1745	5	-	Arabidopsis thaliana	cis-acting element involved in the abscisic acid responsiveness
ScSPL21	STRE	AGGGG	147	5	+	Arabidopsis thaliana
ScSPL21	STRE	AGGGG	1085	5	+	Arabidopsis thaliana
ScSPL21	STRE	AGGGG	1184	5	+	Arabidopsis thaliana
ScSPL21	STRE	AGGGG	1224	5	-	Arabidopsis thaliana
ScSPL21	STRE	AGGGG	1249	5	+	Arabidopsis thaliana
ScSPL21	STRE	AGGGG	1344	5	-	Arabidopsis thaliana
ScSPL21	STRE	AGGGG	1849	5	+	Arabidopsis thaliana
ScSPL21	CTAG-motif	ACTAGCAGAA	1277	9	-	Avena sativa
ScSPL21	CTAG-motif	ACTAGCAGAA	1349	9	+	Avena sativa
ScSPL21	G-Box	CACGTT	1745	6	+	Pisum sativum	cis-acting regulatory element involved in light responsiveness
ScSPL21	MBSI	TTTTTACGGTTA	1117	11	-	Petunia hybrida	MYB binding site involved in flavonoid biosynthetic genes regulation
ScSPL21	MBSI	aaaAaaC(G/C)GTTA	1125	12	+	Petunia hybrida	MYB binding site involved in flavonoid biosynthetic genes regulation
ScSPL21	MYB	CAACCA	1820	6	-	Arabidopsis thaliana
ScSPL21	CCGTCC-box	CCGTCC	39	6	+	Petroselinum hortense
ScSPL21	Unnamed__2	CCCCGG	559	6	-	Zea mays
ScSPL21	Unnamed__2	CCCCGG	573	6	-	Zea mays
ScSPL21	Unnamed__2	CCCCGG	640	6	-	Zea mays
ScSPL21	CAAT-box	CAAT	107	4	+	Nicotiana glutinosa	common cis-acting element in promoter and enhancer regions
ScSPL21	CAAT-box	CAAT	169	4	+	Nicotiana glutinosa	common cis-acting element in promoter and enhancer regions
ScSPL21	CAAT-box	CAAAT	260	5	+	Pisum sativum	common cis-acting element in promoter and enhancer regions
ScSPL21	CAAT-box	CAAT	415	4	+	Nicotiana glutinosa	common cis-acting element in promoter and enhancer regions
ScSPL21	CAAT-box	CCAAT	440	5	+	Arabidopsis thaliana	common cis-acting element in promoter and enhancer regions
ScSPL21	CAAT-box	CAAT	441	4	+	Nicotiana glutinosa	common cis-acting element in promoter and enhancer regions
ScSPL21	CAAT-box	CAAAT	1073	5	-	Pisum sativum	common cis-acting element in promoter and enhancer regions
ScSPL21	CAAT-box	CAAAT	1146	5	-	Pisum sativum	common cis-acting element in promoter and enhancer regions
ScSPL21	CAAT-box	CAAT	1254	4	-	Nicotiana glutinosa	common cis-acting element in promoter and enhancer regions
ScSPL21	CAAT-box	CAAT	1299	4	-	Nicotiana glutinosa	common cis-acting element in promoter and enhancer regions
ScSPL21	CAAT-box	CAAT	1416	4	-	Nicotiana glutinosa	common cis-acting element in promoter and enhancer regions
ScSPL21	CAAT-box	CCAAT	1447	5	+	Arabidopsis thaliana	common cis-acting element in promoter and enhancer regions
ScSPL21	CAAT-box	CAAT	1448	4	+	Nicotiana glutinosa	common cis-acting element in promoter and enhancer regions
ScSPL21	CAAT-box	CAAT	1806	4	+	Nicotiana glutinosa	common cis-acting element in promoter and enhancer regions
ScSPL21	GATA-motif	GATAGGG	1709	7	-	Pisum sativum	part of a light responsive element
ScSPL21	TCA-element	CCATCTTTTT	1615	9	+	Nicotiana tabacum	cis-acting element involved in salicylic acid responsiveness
ScSPL21	Sp1	GGGCGG	562	6	+	Oryza sativa	light responsive element
ScSPL21	Sp1	GGGCGG	567	6	+	Oryza sativa	light responsive element
ScSPL21	Sp1	GGGCGG	577	6	+	Oryza sativa	light responsive element
ScSPL21	Sp1	GGGCGG	589	6	+	Oryza sativa	light responsive element
ScSPL21	Sp1	GGGCGG	593	6	+	Oryza sativa	light responsive element
ScSPL21	Sp1	GGGCGG	611	6	+	Oryza sativa	light responsive element
ScSPL21	Sp1	GGGCGG	615	6	+	Oryza sativa	light responsive element
ScSPL21	Sp1	GGGCGG	628	6	+	Oryza sativa	light responsive element
ScSPL21	Sp1	GGGCGG	644	6	+	Oryza sativa	light responsive element
ScSPL21	Sp1	GGGCGG	656	6	+	Oryza sativa	light responsive element
ScSPL21	Sp1	GGGCGG	660	6	+	Oryza sativa	light responsive element
ScSPL21	Sp1	GGGCGG	678	6	+	Oryza sativa	light responsive element
ScSPL21	Sp1	GGGCGG	682	6	+	Oryza sativa	light responsive element
ScSPL21	Sp1	GGGCGG	700	6	+	Oryza sativa	light responsive element
ScSPL21	Sp1	GGGCGG	704	6	+	Oryza sativa	light responsive element
ScSPL21	Sp1	GGGCGG	717	6	+	Oryza sativa	light responsive element
ScSPL21	Sp1	GGGCGG	722	6	+	Oryza sativa	light responsive element
ScSPL21	Sp1	GGGCGG	770	6	+	Oryza sativa	light responsive element
ScSPL21	Sp1	GGGCGG	782	6	+	Oryza sativa	light responsive element
ScSPL21	Sp1	GGGCGG	801	6	+	Oryza sativa	light responsive element
ScSPL21	Sp1	GGGCGG	805	6	+	Oryza sativa	light responsive element
ScSPL21	Sp1	GGGCGG	810	6	+	Oryza sativa	light responsive element
ScSPL21	Sp1	GGGCGG	830	6	+	Oryza sativa	light responsive element
ScSPL21	Sp1	GGGCGG	845	6	+	Oryza sativa	light responsive element
ScSPL21	Sp1	GGGCGG	865	6	+	Oryza sativa	light responsive element
ScSPL21	Sp1	GGGCGG	904	6	+	Oryza sativa	light responsive element
ScSPL21	Sp1	GGGCGG	916	6	+	Oryza sativa	light responsive element
ScSPL21	Sp1	GGGCGG	935	6	+	Oryza sativa	light responsive element
ScSPL21	Sp1	GGGCGG	939	6	+	Oryza sativa	light responsive element
ScSPL21	Sp1	GGGCGG	944	6	+	Oryza sativa	light responsive element
ScSPL21	TATA-box	TATAAATA	1135	8	-	Daucus carota	core promoter element around -30 of transcription start
ScSPL21	TATA-box	TATAAAT	1136	7	-	Brassica juncea	core promoter element around -30 of transcription start
ScSPL21	TATA-box	TATAAA	1137	6	-	Helianthus annuus	core promoter element around -30 of transcription start
ScSPL21	TATA-box	TATAA	1138	5	-	Arabidopsis thaliana	core promoter element around -30 of transcription start
ScSPL21	TATA-box	TATA	1139	4	-	Arabidopsis thaliana	core promoter element around -30 of transcription start
ScSPL21	GC-motif	CCCCCG	574	6	-	Zea mays
ScSPL21	GC-motif	CCCCCG	641	6	-	Zea mays
ScSPL21	GC-motif	CCCCCG	725	6	-	Zea mays
ScSPL21	GC-motif	CCCCCG	813	6	-	Zea mays
ScSPL21	GC-motif	CCCCCG	833	6	-	Zea mays
ScSPL21	GC-motif	CCCCCG	848	6	-	Zea mays
ScSPL21	GC-motif	CCCCCG	868	6	-	Zea mays
ScSPL21	GC-motif	CGGCGCCCT	884	9	-	Oryza sativa
ScSPL21	GC-motif	CCCCCG	992	6	-	Zea mays
[truncated: 988 more rows]
