# Supplementary material for: Identification and expression analysis of the SPL transcription factor family in rye (Secale cereale L.) in response to abiotic stresses
Source: Research Square preprint supplement (doi:10.21203/rs.3.rs-3142765/v1), 2023-07-13
Supplement: Supplementary file 4 [file a255890d6de9027ebea94b8d.xlsx]

## Sheet: ScSPL gene information
Supplementary Table 1 List of the 21 ScSPL genes identified in this study.
Group	Gene	Gene ID	Protein length	Mw(KDa)	pI	Location	Domain	Predicted Subcellular location（W）
I	ScSPL1	ScWN1R01G350700.1	862	94119.1	5.99	Chr1	SBP	nucl: 4, cyto: 4, mito: 2, E.R.: 2, chlo: 1, vacu: 1
VI	ScSPL2	ScWN2R01G006900.1	411	43678.9	9.15	Chr2	SBP	nucl: 14
VI	ScSPL3	ScWN2R01G007000.1	398	42855.3	9.08	Chr2	SBP	nucl: 14
II	ScSPL4	ScWN2R01G060800.1	819	90243.1	8.25	Chr2	SBP,ANK	nucl: 12, cyto: 2
VIII	ScSPL5	ScWN2R01G484500.1	350	36389.9	9.56	Chr2	SBP	nucl: 12, mito: 2
VI	ScSPL6	ScWN2R01G578100.1	414	44398.8	7.47	Chr2	SBP	nucl: 14
VI	ScSPL7	ScWN3R01G362700.1	193	20127.5	9.87	Chr3	SBP	nucl: 9, extr: 3, chlo: 1, cyto: 1
VII	ScSPL8	ScWN3R01G558600.1	420	44157.8	8.93	Chr3	SBP	nucl: 13, cyto: 1
II	ScSPL9	ScWN4R01G119900.1	1127	123296	7.35	Chr4	SBP,ANK	vacu: 7, chlo: 5, nucl: 1, mito: 1
VII	ScSPL10	ScWN4R01G225700.1	410	43464.2	6.51	Chr4	SBP	nucl: 14
II	ScSPL11	ScWN4R01G235700.1	1130	123590	7.17	Chr4	SBP,ANK	vacu: 7, chlo: 5, nucl: 1, mito: 1
VIII	ScSPL12	ScWN4R01G249800.1	380	39668.7	9.07	Chr4	SBP	nucl: 14
VIII	ScSPL13	ScWN4R01G381200.1	361	37906.9	9.1	Chr4	SBP	nucl: 14
VIII	ScSPL14	ScWN5R01G290900.1	405	42253.3	8.87	Chr5	SBP	nucl: 14
VII	ScSPL15	ScWN5R01G314500.1	405	42419.4	7.2	Chr5	SBP	nucl: 13, cyto: 1
V	ScSPL16	ScWN6R01G035600.4	546	58433.8	8.92	Chr6	SBP	vacu: 7, extr: 3, golg: 2, nucl: 1, plas: 1
VI	ScSPL17	ScWN6R01G080500.1	443	47806.2	6.8	Chr6	SBP	nucl: 14
V	ScSPL18	ScWN6R01G103100.1	240	26767.3	9.61	Chr6	SBP	nucl: 14
II	ScSPL19	ScWN7R01G070200.1	261	28555.8	5.74	Chr7	SBP	chlo: 8, nucl: 5, mito: 1
II	ScSPL20	ScWN7R01G070300.2	867	94866.7	6.1	Chr7	SBP,ANK	chlo: 7, vacu: 3, mito: 2, nucl: 1, extr: 1
VII	ScSPL21	ScWNUn01G189200.1	309	32780	9.77	Chr8	SBP	nucl: 13, cyto: 1

## Sheet: ScSPL gene sequences
Supplementary Table 1 List of the 21 ScSPL genes identified in this study
Gene	Gene ID	Sequence Type	Sequences
ScSPL1	ScWN1R01G350700.1	CDS	ATGGACGCCTCCGACTCCGGCGGGGGCGGCGCGGCGGCCGATGCGGGCGAGCCCGTCTGGGACTGGGACAACCTCCTCGACTTCGCCATCCCGGAAGGCGATTCCCTGCTCCTTCCGTGGGATGACCCCCTCGGGATCGAGGGCGATCCCACCACCGAGGGGGCGCTGCTCCCTGCCCCGCCTCCGCCGCAGCCAGTGGAGGCGGAGCCGGCGCCACCGCCACCGCCACCGTCTCCGCCTGTTGAGGCCGGGGGAAGCAGGCGCGGCGTCAGAAAGCGCGACCCGCGGCTGGTGTGCCCGAACTACCTCGCGGGGGTCGTGCCCTGCGCGTGCCCCGAGTTGGATGAGATGGCGGCCGCCGCGGAGGTCGAGGAGGTTGCAGCGGAGGTGCTTGCCGGC…
ScSPL1	ScWN1R01G350700.1	Protein	MDASDSGGGGAAADAGEPVWDWDNLLDFAIPEGDSLLLPWDDPLGIEGDPTTEGALLPAPPPPQPVEAEPAPPPPPPSPPVEAGGSRRGVRKRDPRLVCPNYLAGVVPCACPELDEMAAAAEVEEVAAEVLAGPRKKPKAASRGSSGAVVKTGGAGGGSGATGRGGAAEMRCQVPGCEADIRELKGYHKRHRVCLRCAHASAVMIDGVQKRYCQQCGKFHILLDFDEDKRSCRRKLERHNKRRRRKPDSKGTLEKEIDDHLDLSAEGSGGGEIREENIDGATCDMFETVLSNKVLDRETPVGSEDALSSPTFTQLSLQNDQSKSIVTFAASAEACLGAKQENAKLTNSPVHDSKSAYSSSCPTGRISFKLYDWNPAEFPRRLRNQIFEWLSSMPVELEG…
ScSPL2	ScWN2R01G006900.1	CDS	ATGATGAGCGGCGGCAGGATGAACGCGGCGGCGAGCGACGACTTCCCCTTCGCGGCAATGCAGCCGCCGCCCTACGTCGGCTTCGAGCACGCCGGCATGGTCCAGGCCGGCGGGGGAGGCCAGGGCCTGCGCCACCAGGGCGCGATGATGTACGACAACTTGGACTTCGCGGCGGCCTTCGGGCAGTTCCAGGACCACCAGATGCTGGCGCTGCCGCCGAGCGGGGGCGGCCCCGGCGGGCTGCTCCCCATGGCGCCGCCGCCCATGCCCGGGATGCAGCTGCAGATGCCGCCCATGGGCATGCACGGCCACGGCGACGTGTACCCGGCGCTCGGGATGGTGAAGCGCGAGGGCGGCGGCGGCGGCGGCGGCGACGCGGGGAGGATCGGGCTCAACCTC…
ScSPL2	ScWN2R01G006900.1	Protein	MMSGGRMNAAASDDFPFAAMQPPPYVGFEHAGMVQAGGGGQGLRHQGAMMYDNLDFAAAFGQFQDHQMLALPPSGGGPGGLLPMAPPPMPGMQLQMPPMGMHGHGDVYPALGMVKREGGGGGGGDAGRIGLNLGRRTYFSPGDMMAVDRLLMRSRLGGVFGLGFGGAHHQPPRCQAEGCKADLSGAKHYHRRHKVCEYHAKASLVAAAGKQQRFCQQCSRFHVLTEFDEAKRSCRKRLAEHNRRRRKPAASSTTATSKDSAPPSKKPNTGAISSSYAADNNNNLSAAKSTISSNTSAISCLQQHDQSKAARPMTLTLGEPREKDGHQQQQLHSAMQLQHHHQEQQQHFITSLLQQSTNGNGNNSNILSCSSVCSSGLPSAGAANGEVSDQNNHGGGNNN…
ScSPL3	ScWN2R01G007000.1	CDS	ATGATGAGCGGCGGCAGGATGAACGCGGCGGCGAGCGACGACTTCCCCTTCGCGGCAATGCAGCAGCCGCCCTACGTCGGCTTCGAGCACGCCGGCATGGTCCAGGCCGGCGGCGGTGGAGGAGGCCAGCGCCAGCAGGGCGCGATGATGTACGACAACTTGGACTTCGCGGCGGCCTTCGGGCAGTTCCAGGACCACCAGATGCTGGCGCTGCCGCCCAACGGGGGCGGGCTGCTCCCCATGGCGCCGCCGCCCATGCCCGGGATGCAGCTGCAGATGCCGCCCATGGGCATGCACGGCCACGGCGACGTGTACCCGGGGATGGGGATGGGGATGGTGAAGCGCGAGGGCGGGGACGCGGGGAGGATCGGGCTGAACCTCGGCCGGCGGACCTACTTC…
ScSPL3	ScWN2R01G007000.1	Protein	MMSGGRMNAAASDDFPFAAMQQPPYVGFEHAGMVQAGGGGGGQRQQGAMMYDNLDFAAAFGQFQDHQMLALPPNGGGLLPMAPPPMPGMQLQMPPMGMHGHGDVYPGMGMGMVKREGGDAGRIGLNLGRRTYFSPGDMMAVDRMLMRSRLGGVFGLGFGRAHHQAPRCQVEDCKADLSGAKHYHRRHKVCEYHAKAALVSAAGKQQRFCQQCSRFHVLTEFDEAKRSCRRRLAEHNRRRRKPAPNSTATSSKDSAPPSKKPNAGGISSSYTADNNTLSTTKSTISSTTSAISFLQQGEARAAVAARPTALTLGASPEKDDEQQQIRNAMQLHHHQEQQHFITSLLQTNIINNSNIMSCSSVSSSPMPSAAAAANGEVSDQNNDNANNNMHMFEVDFM
ScSPL4	ScWN2R01G060800.1	CDS	ATGTCTGGTGGGCTCAAGAACAAGAAGAAGGGCCACGAGTGGGATTTGAACGACTGGAGATGGGACGGCAACCTCTTCCTGGCCACGCCGTCGCCAAACGCGTACGCTCCGTCGGGGTGCGGCAGCAGGGGACTTGGGCGAGCGGAGGAGGGGGTCAGTTTTGGTGCTGCTGCTGACAAGAGCAGGAGGAGGAGGAGAGTCACCACGGTGGATAACCCCGAGGAGTGCAGCAACACTGCGAATGCGATTCCTCATGAAAGGTTTGCTGTTCGGAGAGGACAGATCGGCGAAGAAGAGGGACCTGCAAATGCAACAGCAGGTGCATATTCTAGCTCTGCTCCATCTTGCCAAGTCGACGGCTGCCACGCGGATCTCGGCGACGATAGGGACTACCATAGG…
ScSPL4	ScWN2R01G060800.1	Protein	MSGGLKNKKKGHEWDLNDWRWDGNLFLATPSPNAYAPSGCGSRGLGRAEEGVSFGAAADKSRRRRRVTTVDNPEECSNTANAIPHERFAVRRGQIGEEEGPANATAGAYSSSAPSCQVDGCHADLGDDRDYHRRHKVCEPHTKSTLVRIKNIEHRFCQQCSRFHLVQEFDEGKKSCRSRLATHNRRRRKAPAEAVSSLSENQSLTNTLLLLLRQLAGQDSAASSSEQINGPNFLVNLLKNLAAVAGTQACQDMLKDATSSNAGNYVGNQSGPPVHAEEPLAKRREQNFDLNNAYVEEDESRTDKIVFKLFGKQPNDFPADLRAQILNWLSHYPSDMESYIRPGCVILTIYLRLPTWMWDKLNVDPAPWIENLISISTHGFWETGWLYARVQDRLTLSCN…
ScSPL5	ScWN2R01G484500.1	CDS	ATGGAAGGAGACGGCGACGCTAGGTCGAGAGCGACACTGGCATGGGATCTCGGGGTGCAGTGGGCGCCCTCCGCCTCGGCTGCTTACCCGCAGCATTTCCTGCCGCCGCCGGGGGTGGCTAGCCAGCAGCAGCACATGCAGCAGGAGCTCACTAGCCTCAAGCTGGGGAAGCGCCCGTCCAACTTGGCCGGCGGCCAGGTGGCGCAGGTCGATGGGAGCGGAGGCGGCGGCGGGCCTGCCGTGGTGGAAGGCAAGAGGAAGGAGAAGGCGGGGGCACCGGCAACGGCGGCCATGCCGAGGTGCCAGGTGGATGGGTGCCACATGGCGCTGGCGGGGGCCAAGGAGTACCACCGGCGGCACAAGGTGTGCGAGGCGCACTCCAAGGCGCCCAGGGTCATC…
ScSPL5	ScWN2R01G484500.1	Protein	MEGDGDARSRATLAWDLGVQWAPSASAAYPQHFLPPPGVASQQQHMQQELTSLKLGKRPSNLAGGQVAQVDGSGGGGGPAVVEGKRKEKAGAPATAAMPRCQVDGCHMALAGAKEYHRRHKVCEAHSKAPRVIVHGAEQRFCQQCSRFHAMAEFDEAKRSCRRRLAGHNERRRKSNASDAMARGSAHAHGVASLVHGFAPYGGLPTSPAGALSLLSSARAAPWLVPTTPGDLFSARSSSAALDELIAENRAALLACHFFPQRSAARPTVAEMAPAWHQAHQQAPPGHAAVGNGAGRDQGAPPPAGHVTLDLMQAPATPFRPMSQGRPAEDGDAGRGSGGWAPLQGAHAV
ScSPL6	ScWN2R01G578100.1	CDS	ATGATGAACCTGCCAGCCGCAGCTGGGAACTCCTGCGACGAGTTCGGCTATGGGGCTCCCAACCCGCCGCCGCCGTCGCTCTTCCCGATCATGGACCACCAGGAGGGGGCCGGCGGCATCCACAGGGAGCACGACCACCACCACCACCACCACCTCGGTGGTTACAGCCTCGAGCCCAGCTCGCTGGCGCTCCTCCCCCCGTCCAGCCACGCCACCATCGCTGCCCACAACCCCCACGACATCCTCCAGTTCTACCACCACCCCACCTCGCACCACTACCTCGCCGCAGCCGCGGCAGGAGGCAACGGCAGCCCCTACGGCCAATTCGGCGGGGGCGGCGGCGGCGGCGGCGGCTTCCAGTCGTACTACCACCAGCAGGCGGGGACGGGGGCGCCCGAG…
ScSPL6	ScWN2R01G578100.1	Protein	MMNLPAAAGNSCDEFGYGAPNPPPPSLFPIMDHQEGAGGIHREHDHHHHHHLGGYSLEPSSLALLPPSSHATIAAHNPHDILQFYHHPTSHHYLAAAAAGGNGSPYGQFGGGGGGGGGFQSYYHQQAGTGAPEYYFPTLVSSAEENMASFAATQLGLNLGYRTYFPPRGGYTYGHHPPRCQAEGCKADLSGAKRYHRRHKVCEHHSKAPVVVTAGGLHQRFCQQCSRFHLLDEFDDAKKSCRKRLADHNRRRRKSKPSEADAADKRRTQASKAASTKGKAAGSSSKSTGTGDGMDIQVQLGSGDLSKNQDESMGLGEVVKEMGQQVDPKGKASMQQQQQQGHHGHGLHLQSQHGFPFPSSSAGSCFPQSQAVSSTDNTSNIGQVQQDQPGLGFHQHSNI…
ScSPL7	ScWN3R01G362700.1	CDS	ATGGACCGCAAGGACAAGTCCCGCAAGTCCTCCTCGGCAGCGTCCATGGCCGCGCTTGCCGCCGCAGCTGCGGCCGGCGACGTGGCCCGAGCCGACGGGATGTCCGGCGAGGAGGACCAGAAGCTGAAGCTCGTGAACGTTCCCGTGGTTTCCGTCGGCGGCTCGAGCTCCTCTGCCGCGGCGGTGGCGGTGAGGAGGGGCAGTGGTGCTGCTGGCGCCGTGGCGACGGGCGCGGCTGGGGCAGGCGGGCCGAGCTGCCAGGCTGAGAGGTGCGGCGCCGACCTCACCGAGGCGAAGCGGTACCACCGCAGGCACAAGGTGTGCGAGGCGCACGCAAAGGCTGCTGTGGTGGTCGTCGCCGGCCTCCGCCAGCGCTTCTGCCAGCAATGCAGCCGGTTC…
ScSPL7	ScWN3R01G362700.1	Protein	MDRKDKSRKSSSAASMAALAAAAAAGDVARADGMSGEEDQKLKLVNVPVVSVGGSSSSAAAVAVRRGSGAAGAVATGAAGAGGPSCQAERCGADLTEAKRYHRRHKVCEAHAKAAVVVVAGLRQRFCQQCSRFHELLEFDDQKRSCRRRLAGHNERRRKSSAEANGGDGCRHADQDGRSHPGNPPLNHFQIR
ScSPL8	ScWN3R01G558600.1	CDS	ATGGATTCTTGGGAGCCCAAGATGCCTTCTTGGGACCTCGGCACGGTGGTCGCGCCGAGCGGCGGCGGAGGAGGAGGAGGCGGCGGCGCGCTGGACCTGAAGCTCGGCGCGCCGACGAGCTGGAGGCCGGTTCCTACGGCGGCGGCGGCATCGGTGCAGCAGCACCAGCAGCAGCAGCAGCCGCCTTCCGCGGCGCCGGCGCCGGCGAAGCGGGCCAGGGCGGGGCAGGGGCAGCAGACGGTGCCGCCGTGCTCCGTGGAGGGGTGCACGGCCGACCTGTCCCGGTGCCGCGAGTACCACCGCCGGCACAAGGTCTGCGAGGCGCACTCCAAGACGCCCGTCGTCGCCGTCGCCGGCCAGCAGCAGCGCTTCTGCCAGCAGTGCAGCAGGTTCCATTTG…
ScSPL8	ScWN3R01G558600.1	Protein	MDSWEPKMPSWDLGTVVAPSGGGGGGGGGALDLKLGAPTSWRPVPTAAAASVQQHQQQQQPPSAAPAPAKRARAGQGQQTVPPCSVEGCTADLSRCREYHRRHKVCEAHSKTPVVAVAGQQQRFCQQCSRFHLLGEFDEVKRSCRKRLDGHNRRRRKPQPDPLNPAGLFANHHGVTRFASYPQIFSPTSMAEPKWPGGIAVKTEADAFHEQYYSFSGAASLFHHGKPERKHFPFLTDGGGDATFGCQPPAFTITPSSESSSNSSRHSNGKTTMFAHDGGPDHNCALSLLSDNPAPAHIMVPAEAHHLAGGGGGGVTIQYGGGGGGKVARLSSNGDVSLTGLSYVSLGDKGSPMLHASNRSHHNAATATTAVTTSTAAASAASQLQQQYHGYYHHQHQVS…
ScSPL9	ScWN4R01G119900.1	CDS	ATGCAGAGGGAGGTGGGGCCGCAGGTGGCCTCCCCGCTGTACCTGCACCAGATCCAGCCGCTGCCTCCCCATGCGGCGGCGGCGGCCAGGAAGCGCGGGAGCCCGTGGCCCGCCGTGGAGCCGCCGGAGAACGCCGCGATGGGGGCCGGCGCAGCGGCCGGAGGGAACTGGAACCCCAGCATGTGGGACTGGGACAGCCGCGCCTTCACCGCCAGGCCGTCCTCCGACGCGCTCCGCCTCGGCGGCGGGCTGAACCACCACCATCACCAGCAGCAGCCGCAGCCTCCGACGGCGACGGCTGCCGAGGTACAGCGGCAGGGGGGCGGAGGTGCCGGTGACCTGAGCCTTCAGCTGACCCTGCGGGAGGAGGCATCGATGGCGATGGATGTGAGCCCGACG…
ScSPL9	ScWN4R01G119900.1	Protein	MQREVGPQVASPLYLHQIQPLPPHAAAAARKRGSPWPAVEPPENAAMGAGAAAGGNWNPSMWDWDSRAFTARPSSDALRLGGGLNHHHHQQQPQPPTATAAEVQRQGGGGAGDLSLQLTLREEASMAMDVSPTTTLSSSPSPPARASLEQAVRPSKRVRSGSPGTASGGGGGGGGGGSASGGGSYPMCQVDDCRADLTSAKDYHRRHKVCEIHSKTTKAVVGNQMQRFCQQCSRFHPLSEFDEGKRSCRRRLAGHNRRRRKTQPTDVASQLLLPENQENAANRTQDIVNLITVIARLQGGNVGKLPSIPPIPDKDNLVQIISKINSINSANSLAKSPPSEAIDLNASHGQQQDSSVQNATKVIDKQTVPSTMDLLTVLSGALGTSTPETNTSQSQGSSD…
ScSPL10	ScWN4R01G225700.1	CDS	ATGGACTGGGATCTCAAGATGCCGCCCGGCGCCTGGGACCTCGCCGAGCTGGAGAACGACGCGGCCGCCGCGCCGGCGGGCGGGCAGGCGCCGGCCGGTGGCATTGCTAATGCGGCCGGCCGGCAGGAGTGCTCTGTGGACCTGAAGCTCGGCGGGCTCGGCGACTGCGGCGTTGCCCCGGACAGCCGCGGCCTTGGCAAGGCGCCGGCCGAGGCGGCGTCCTCGGCGTCGGCGCCCAGCGCGGCGAAGCGGCCGCGCGCGTCGTCGGGAGGGGGAGGTGGGAGCGGCGCGGGGCAGCAGCAGTGCCCGTCGTGCGCGGTGGACGGGTGCAGGGCGGACCTGAGCAGGTGCCGCGACTACCATCGCCGGCACAAGGTGTGCGAGGCGCACTCCAAGACC…
ScSPL10	ScWN4R01G225700.1	Protein	MDWDLKMPPGAWDLAELENDAAAAPAGGQAPAGGIANAAGRQECSVDLKLGGLGDCGVAPDSRGLGKAPAEAASSASAPSAAKRPRASSGGGGGSGAGQQQCPSCAVDGCRADLSRCRDYHRRHKVCEAHSKTPVVTVAGREMRFCQQCSRFHLLTEFDETKRSCRKRLDGHNRRRRKPQPDAMNSASFMTSQQGTRFPSFPTPRPEQNWPGIIKTEENPYYTHQLPLGISNRQHFGGSTSSYAKEGRRFPFLQEGEINFATGVALEPSVCQPLLKTTAPPESSSSSSKMFSDGLTPVLDSDCALSLLSAPANSSGIEVGQMVQQTEHIPIAQPLFSNLQFSSSSWFSRTQASTGTVSATGFSCPVGENEQLNNVLSSDNNDLNYNGIFHVGGEGSSDG…
ScSPL11	ScWN4R01G235700.1	CDS	ATGCAGAGGGAGGTGGGGCCGCAGGTGGCCTCCCCGCTGTACCTGCACCAGATCCAGCCGCTGCCTCCCCATGCGGCGGCGGCGGCCAGGAAGCGCGGGAGCCCGTGGCCCGCCGTGGAGCCGCCGGAGAACGCCGCGATGGGGGCCGGCGCAGCGGCCGGAGGGAACTGGAACCCCAGCATGTGGGACTGGGACAGCCGCGCCTTCACCGCCAGGCCGTCCTCCGACGCGCTCCGCCTCGCCGGCGGGCTGAACCACCACCATCACCAGCAGCAGCAGCAGGCGCAGCCGCCGACGGCGACTGCTGTCGAGGTACAGCGGCAGGGGGGCGGAGGTGCCGGTGACCTAAGCCTTCAGCTGACCCTGCGGGAGGAGGCATCGATGGCGATGGATGTGAGC…
ScSPL11	ScWN4R01G235700.1	Protein	MQREVGPQVASPLYLHQIQPLPPHAAAAARKRGSPWPAVEPPENAAMGAGAAAGGNWNPSMWDWDSRAFTARPSSDALRLAGGLNHHHHQQQQQAQPPTATAVEVQRQGGGGAGDLSLQLTLREEASMAMDVSPTTTLSSSPSPPARASLEQAVRPSKRVRSGSPGTASGGGGGGGGGGGSASGGGSYPMCQVDDCRADLTSAKDYHRRHKVCEIHSKTTKAVVGNQMQRFCQQCSRFHPLSEFDEGKRSCRRRLAGHNRRRRKTQPTDVASQLLLPENQENAANRTQDIVNLITVIARLQGGNVGKLPSIPPIPDKDNLVQIISKINSINSANSLAKSPPSEAIDLNASHGQQQDSSVQNATKVIDKQTVPSTMDLLTVLSGALGTSTPETNTSQSQG…
ScSPL12	ScWN4R01G249800.1	CDS	ATGGAGATTGGCAGCGGCGGCGACGGGAGCGGCGGAGGGGGCGGGGACGACCAGCACCGCCACGGCCTCAAGTTCGGCAAGAAGATCTACTTCGAGGACGCCACGGGCACCGGCGGCGGCAATGCGTCGTCGTCCAAGCCGCCCGCGGGCGGCGGGAGGAAGGGGAAGGCCGTGGCCGCCGGGGGAGCGTCCGGCGCCGCGCCGCCGCGGTGCCAGGTGGAGGGGTGCGGCGTGGATCTGAGCGGCGCCAAGCAATACCACTGCCGCCACAAGGTGTGCTCCATGCACACCAAGGAACCCCGCGTCGTCGTCGCCGGCCTCGAGCAGCGCTTCTGCCAGCAGTGCAGCAGGTTCCACCAGTTACCTGAATTTGATCAAGGAAAACGCAGCTGCCGCAGA…
ScSPL12	ScWN4R01G249800.1	Protein	MEIGSGGDGSGGGGGDDQHRHGLKFGKKIYFEDATGTGGGNASSSKPPAGGGRKGKAVAAGGASGAAPPRCQVEGCGVDLSGAKQYHCRHKVCSMHTKEPRVVVAGLEQRFCQQCSRFHQLPEFDQGKRSCRRRLAGHNERRRKAPPGPLAARYGRLAASFEEPGRFRSYLLDFSYPRVPSSVRDAWPGARPGYRMPGEIQWQGNLDLRPHTGAATGYHGHHAYSSHGGGFPGPELPPGGCLAGVAADSSCALSLLSTQPWDNTPHGASHDHRSAGFDGHPVGVSPSIMASNYMPPPASPWGGSRGHEGGRNAPHQQLPHDVQLHEVHHPAGSSHHGNFSGELELALQGNRPAPGPRGDHGGSGGGAFDHPGSSSNWSL
ScSPL13	ScWN4R01G381200.1	CDS	ATGGAGATTGGCAGCGGCGGCGACGGGAGCGGCGGAGGGGGCGGGGACGACCAGCACCGCCACGGCCTCAAGTTCGGCAAGAAGATCTACTTCGAGGACGCCACGGGCACCGGCGGCGGCAATGCGTCGTCGTCCAAGCCGCCCGCGGGCGGCGGGAGGAAGGGGAAGGCCGTGGCCGCCGGGGGAGCGTCCGGCGCCGCGCCGCCGCGGTGCCAGGTGGAGGGGTGCGGCGTGGATCTGAGCGGCGCCAAGCAATACCACTGCCGCCACAAGGTGTGCTCCATGCACACCAAGGAACCCCGCGTCGTCGTCGCCGGCCTCGAGCAGCGCTTCTGCCAGCAGTGCAGCAGGTTCCACCAGTTACCTGAATTTGATCAAGGAAAACGCAGCTGCCGCAGA…
ScSPL13	ScWN4R01G381200.1	Protein	MEIGSGGDGSGGGGGDDQHRHGLKFGKKIYFEDATGTGGGNASSSKPPAGGGRKGKAVAAGGASGAAPPRCQVEGCGVDLSGAKQYHCRHKVCSMHTKEPRVVVAGLEQRFCQQCSRFHQLPEFDQGKRSCRRRLAGHNERRRKAPPGPLAARYGRLAHPLVSNEEPGRFRSYLLDFSYPRVPSSVRDAWPGARPGYRMPGEIQWQGNLDLRPHTELPPGGCLAGVAADSSCALSLLSTQPWDNTPHGASHDHRSAGFDGHPVGVSPSIMASNYMPPPASPWGGSRGHEGGRNAPHQQLPHDVQLHEVHHPAGSSHHGNFSGELELALQGNRPAPGPRGDHGGSGGGAFDHPGSSSNWSL
ScSPL14	ScWN5R01G290900.1	CDS	ATGGAGACCGGGGGCAGCGGCGGCGGCGGCGGGAGAGGGCCCGGGGACGACCTCCACGGGCTCAACTTCGGCAAGAAGATCTACTTCGAGCAGGACGTGGCCGGGTCCTCCTCCTCCTCGGGTGGCAGGAGGGGCAAGGGCCCCGCCCGGGCGGGGCCAGCAGGAGGAGGAGGCGGAGGATCAGGAGGAGCCTCCACCCCCGCGGCCGGCGGCAACGCCTCGCAGTCGCAGCAGCCGCGGTGCCAGGTGGAGGGGTGCGGCGTGGATCTGAGCGGCGGCAAGACCTACTACTGCCGCCACAAGGTGTGCTTGGAGCACTCCAAGGCGCCGCTCGTCGTCGTCGCCGGCATCGAGCAGCGCTTCTGCCAGCAGTGCAGCAGGTTCCACCAGCTGCCTGAA…
ScSPL14	ScWN5R01G290900.1	Protein	METGGSGGGGGRGPGDDLHGLNFGKKIYFEQDVAGSSSSSGGRRGKGPARAGPAGGGGGGSGGASTPAAGGNASQSQQPRCQVEGCGVDLSGGKTYYCRHKVCLEHSKAPLVVVAGIEQRFCQQCSRFHQLPEFDQGKRSCRRRLAGHNERRRKPPPGPMSARYGRLAASFNEDPGRLRSFLLDFSYPRAPAGVRDPWPAVQPGDHRMPGTTQWQGSHHEHQPHRSAVAGYGDHHAYNGQGSSSGGGGAPMIPGGYELPSDECMAGVAGDSSCALSLLSTQPWDSSAHSSSHNRSPAMSTTSAFQGSPVAPSVMASNYMAASSSGSWGSPRGARSMQQQHHHHQHHMQHDAVMSEVHPSSVHHGQFGELELALQQGRATPNPPHAEHGSGGAFGHSSNA…
ScSPL15	ScWN5R01G314500.1	CDS	ATGGATTGGGATCTCAAGATGCCGGGCTCCTGGGACCTGGCCGAGCTGGAGCACGACGGGGTGCCGGCCATGGCCGCTCCCGCCGCGGCGGGCATGGCCGCCGCGGCCGCGCGCGGGCCGCCGGGCCGCGCCGAGTGCTCCGTCGACCTCAAGCTGGGCGGGCTGGGGGAGTTCGGCCCCGCGGCGGACGGCGCGATGAAGCAGCCGCCCGTGGCGACGGCGGCGGCGGCGAATGGCCCGGCGGCGTCCTTGTCGGCGTCGGCGTCGAACGCCGCGGCGGTGGTGCCGTCGGCGAGCCCGCTGAAGCGGCCGCGCCCGGGGGCCGGCGCGGGGGCGGGGCACTGCCCGTCGTGCGCCGTGGACGGCTGCAAGGCCGACCTGAGCAAGTGCCGCGACTAC…
ScSPL15	ScWN5R01G314500.1	Protein	MDWDLKMPGSWDLAELEHDGVPAMAAPAAAGMAAAAARGPPGRAECSVDLKLGGLGEFGPAADGAMKQPPVATAAAANGPAASLSASASNAAAVVPSASPLKRPRPGAGAGAGHCPSCAVDGCKADLSKCRDYHRRHKVCEAHSKTPLVVVAGREMRFCQQCSRFHLLAEFDEAKRSCRKRLDGHNRRRRKPQVDSMNSGSFMTTQQATRFASFSAPRPEPSWSGIIKSEDSNPYYASHQINFAGSSSSYSKEGRRFPFLHEGDQMSFSTGPLLKAVAPPPPPPPESSSSNKMFSDGQLTHVLDSETVLSLFCHPRPTPPAEHIPSVPNLQQFGSSSWFACSQASSAATGFAAFPGGMDGEQLNAGGALVPSSNDNDMNCHGIFHVGADGSSEGTSPSL…
ScSPL16	ScWN6R01G035600.4	CDS	ATGATACTACCATCTCTGTGTACTTCCTCGGTGCTGCTCATATGTGTTCTAAGCTGTTCATCATCATTGACTTTTCCAAGCGCAAAAAAAAAAGTTTGTCCTGATTTCCAAGCTTTGCTAATTCTGCTCCAACCTTGTGTTCCAATTTGTTGCTTCAGTGGCAGCAGCTTGGACGTGCGAGTAGGAGGAGCGGCGCCGGAGATCTTCGGCTCTGGCATGGGCTCGTTTGGGATGGAGTGGAACCAGAGGAGCTCGGTGCTGTGGGACTGGGAGAATTTCCCGCCGATAGGCGAGAACCCCAAGAATGCGATGCAGGCCGAGCCAAGATTTGCCGGCGCTGCGGCCACCATGGGGAATGAACCGCTCCATTCTTCTGGCGGCAGCGGCACCTTCTCGTCC…
ScSPL16	ScWN6R01G035600.4	Protein	MILPSLCTSSVLLICVLSCSSSLTFPSAKKKVCPDFQALLILLQPCVPICCFSGSSLDVRVGGAAPEIFGSGMGSFGMEWNQRSSVLWDWENFPPIGENPKNAMQAEPRFAGAAATMGNEPLHSSGGSGTFSSSSEMGYGSSKSSMSASIDSSSRAGNNMEFRFAPVKNPDRNTSKNAELGKVDNTRTGTSPSSVVAVSSGEPVIGLKLGKRTYFEDVCGGQSVKSSPSGAASAPNKSPASGKKAKAEQQKPHNSYCQVEGCKVDLSSVKEYHRKHRVCELHSKAPKVVVAGLERRFCQQCSRFHALAEFDQIKRSCRRRLNDHNSRRRKPQPEAISFSSSRMSTMFYDARQQPNFLFGQAPYVQMRSCGSSSWDDPGGFKVTHTKAPWLKPTTAAGVH…
ScSPL17	ScWN6R01G080500.1	CDS	ATGATGAGCAGCAGGTTAAGCGGCGGCACGATGGCGCCGGTTAGCGACGTGGCCGACTTCGGCTATGCTCCCATGCAGTCCTACCCCAACTTTGAGCCGGCCGGCATGGTCATGCCCGGCGACCGGCTGCCGCCTTTCCAGCAGCACCACCTCTACGACAGCCTCGACTTCAACGCCCCTGCGTTCTCGTTCCAAGACCCGGCCGTGCTTTTCTCGGGCGGCTCCGCGTTCAGCAACCAGCTCCAGCAGCCCTTCCTCCAGACGCAGGTCACCATGCCGACGATGGCGTCGTCGTCGCTGCTGCAGGCGCCGATGATGACGCTTCCGGGTATGCTGACGTCCTCCTCGGCGTCGCCGGTGGACGCATACACCTTCGGTGGCGGCAGTGGCGGGTTCCTG…
ScSPL17	ScWN6R01G080500.1	Protein	MMSSRLSGGTMAPVSDVADFGYAPMQSYPNFEPAGMVMPGDRLPPFQQHHLYDSLDFNAPAFSFQDPAVLFSGGSAFSNQLQQPFLQTQVTMPTMASSSLLQAPMMTLPGMLTSSSASPVDAYTFGGGSGGFLKREEGSPFSDVGGGGRIGLNLGRRTYFSPADVLAVDRLLMRSRFGGVGAMGMLGLGLGATAHHHQPPRCQAEGCKADLSAAKHYHRRHKVCEYHAKAATVAASGKQQRFCQQCSRFHVLAEFDDAKRSCRKRLTEHNRRRRKPAGVQGKDSEPPSKKADASITSSYTGNHRTQKSTTGAAFSPSASGFSCLQQQQQQQQHEIDSGGQSSNATPTNLSLAAPPPPQDDAGFGAGLDTMLLIQQQGPDEQEEEERQQQHFMMTSLVQS…
ScSPL18	ScWN6R01G103100.1	CDS	ATGGAGTGGACGGCCCCCAAGTCCACCCCGCTCTCCCCGCCCCACCTCCTCTGGGACTGGGGCGACGCCGCCGCGCCTGGCTCCTCCGGCGAGGCGGCGGGGAGGCGCGGGAAGGAGAAGCGGGCCAGGGGGGAGGGGGGCGGCGGCGGAGGAGGAGGAGCGGGCGTGAGGTGCCAGGTGGAGGGCTGCGGGGTCGAGCTCCGCGACGCGAAGGAGTACCACCGGAAGCACCGGGTTTGCGAGGCCCACACCAAGTTCCCCCGCGTCGTCGTCGCCGGCCAGGAGCGCCGCTTCTGCCAGCAGTGCAGCCGGTTCCATGCGCTGTCGGAGTTCGACCAGAAGAAGAGGAGCTGCAGGAGGCGACTATCCGATCACAATGCTCGGCGCCGGAAGCCACAG…
ScSPL18	ScWN6R01G103100.1	Protein	MEWTAPKSTPLSPPHLLWDWGDAAAPGSSGEAAGRRGKEKRARGEGGGGGGGGAGVRCQVEGCGVELRDAKEYHRKHRVCEAHTKFPRVVVAGQERRFCQQCSRFHALSEFDQKKRSCRRRLSDHNARRRKPQPDAFSFAPARLPSSLMFDDRRQISFVWNKDPLSHSRPFPCSPWDSPSDFKLPQVKEIREVSINGQVHFDKSHLPNAVPALSHDIAELLPMKGTICQSFSIYCSSHR
ScSPL19	ScWN7R01G070200.1	CDS	ATGGAGGCGGCCAGGGTAGGGTCGCAGAGCCGCCACCTGTACGGAGGCGGGCTGGGTGGTGAGCTTGAGCAGGCCAGGCGTGAGAAGCGGGTCTTCGGTTGGGACCTCAATGATTGGAGTTGGGACAGCGAGCGCTTTGTCGCCACGCCGGCTCCCGCGGCAGTGCCCAATGGCCTGTCGCTCAATAGCTCGCCGTCTTCCTCTGAGGAAGCCGGGGCCGAGGTGTCTAGGAATGGTGAAGTGAGAGTTGACTCTGATAAGAGGAAGCGAGTGGTTGTCATTCATGACGACGACGATGAGAAGGATGAGGACCCGGCGGGGAACAGTAACCATGTGCTCAGCTTGAGAATTGGTGGCAGCTCTGTTGCTGGCGGCGCGGTTGAGGATGGCGGTGTGAAC…
ScSPL19	ScWN7R01G070200.1	Protein	MEAARVGSQSRHLYGGGLGGELEQARREKRVFGWDLNDWSWDSERFVATPAPAAVPNGLSLNSSPSSSEEAGAEVSRNGEVRVDSDKRKRVVVIHDDDDEKDEDPAGNSNHVLSLRIGGSSVAGGAVEDGGVNEEDRNGKKIRVQGGSSNGPACQVEGCCADLSAAKDYHRRHKVCEMHAKANTAVVGNTVQRFCQQCSRSVLRYYLLFTCDTFVLVGMYGWNMLCTFYFVSILDLFGMQPEAALPNFGVDRRYRRPFEP
ScSPL20	ScWN7R01G070300.2	CDS	ATGACGACGACGATGAGAAGGATGAGGACCCGGGGGAACAGTAACCATGTGCTCAGCTTGAGAATTGGTGGCAGCTCTGTTGCTGGCGGCGCGGTTGAGGATGGCGGTGTGAACGAGGAGGATAGAAATGGTAAGAAGATCAGGGTGCAGGGCGGAAGCTCAAACGGTCCGGCGTGTCAGGTGGAGGGCTGCTGTGCAGACCTTAGCGCGGCGAAGGATTACCATCGGCGTCACAAGGTCTGCGAGATGCATGCTAAGGCAAACACCGCGGTGGTCGGAAATACCGTCCAGCGGTTCTGCCAGCAATGTAGCAGATTTCACCTTCTTCAAGAATTTGATGAAGGAAAGCGAAGTTGTCGCCGGCGTTTAGCAGGCCATAATAAACGTAGGAGGAAAACC…
ScSPL20	ScWN7R01G070300.2	Protein	MTTTMRRMRTRGNSNHVLSLRIGGSSVAGGAVEDGGVNEEDRNGKKIRVQGGSSNGPACQVEGCCADLSAAKDYHRRHKVCEMHAKANTAVVGNTVQRFCQQCSRFHLLQEFDEGKRSCRRRLAGHNKRRRKTRPESAVGGTPIEEKVSSYLLLSLLGICANLNSDNAEHLQGQELLSNLLRNLGNVAKSLDPKELCKLLEACQSMQNRSNAGTSEAANALVNTAAADAAGPSNSKAPFANGGECGQTSSAVVPVQSTATMVATTETPACKFRNFDLNDTCNDMEGFEDGSNCPSWIRQDSTQSPPQTSGNSDSTSAQSLSSSNGDAQCRTDKIVFKLFEKVPSELPPILRSQILGWLSSSPTDIESHIRPGCIILTVYLRLVESSWRELSENMSVYLD…
ScSPL21	ScWNUn01G189200.1	CDS	ATGGATTGGGATCTCAAGATGCCGGGCTCCTGGGACCTGGCCGAGCTGGAGCACGACGGGGTGCCGGCCATGGCCGCTCCCGCCGCGGCGGGCATGGCCGCCGCGGCCGCGCGCGGGCCGCCGGGCCGCGCCGAGTGCTCCGTCGACCTCAAGCTGGGCGGGCTGGGGGAGTTCGGCCCCGCGGCGGACGGCGCGATGAAGCAGCCGCCCGTGGCGACGGCGGCGGCGGCGAATGGCCCGGCGGCGTCCTTGTCGGCGTCGGCGTCGAACGCCGCGGCGGTGGTGCCGTCGGCGAGCCCGCTGAAGCGGCCGCGCCCGGGGGCCGGCGCGGGGGCGGGGCACTGCCCGTCGTGCGCCGTGGACGGCTGCAAGGCCGACCTGAGCAAGTGCCGCGACTAC…
ScSPL21	ScWNUn01G189200.1	Protein	MDWDLKMPGSWDLAELEHDGVPAMAAPAAAGMAAAAARGPPGRAECSVDLKLGGLGEFGPAADGAMKQPPVATAAAANGPAASLSASASNAAAVVPSASPLKRPRPGAGAGAGHCPSCAVDGCKADLSKCRDYHRRHKVCEAHSKTPLVVVAGREMRFCQQCSRFHLLAEFDEAKRSCRKRLDGHNRRRRKPQVDSMNSGSFMTTQQATRFASFSAPRPEPSWSGIIKSEDSNPYYASHQINFAGSSSSYSKEGRRFPFLHEGDQMSFSTGAPALEIPSASLSSRPSRRRRRRRPRAAAATRCSPMDS
