# Supplementary material for: Identification and expression analysis of the SPL transcription factor family in rye (Secale cereale L.) in response to abiotic stresses
Source: Research Square preprint supplement (doi:10.21203/rs.3.rs-3142765/v1), 2023-07-13
Supplement: Supplementary file 5 [file ad52a2eead57b59aaf4c3354.xlsx]

## Sheet: Secale cereale L.
Supplementary Table 2 Analysis and distribution of conserved motifs in Secale cereale L. and other plants SPL proteins.
Motif	Width	Best possible match
1	41	VAGKEQRFCQQCSRFHLLTEFDEAKRSCRKRLAGHNRRRRK
2	41	AGGHQYPRCQVEGCKADLSGAKDYHRRHKVCEYHSKTPKVV
3	50	RTGKIIFKLFGKEPGEIPGNLRDQIVNWLKHYPTEMEGYIRPGCIILTMY
4	50	EDIVDALTDDPQQIGLNCWHNVRDDEGYTPDDYAKFRNNGSYIELVQRKI
5	41	SDSFMTTFQTTRFRWFLTFRNEREWCGIIKTLLDILYYNSL
6	20	GGDECRIGLKLGKRTYFEPA
7	41	RGLLERPYIHCMMGVAADCVCVCILLRTQPWDNSPHSFKWE
8	41	HGVNWNPSIMDWNYMPPTASPWWGSRRHEGGLNHHHHQQQH
9	41	DWDFWRKGRFLVRSDNQLVSYKDGMTRLSKSWRTWNTPELT
10	50	TQIHCTSAGKYISKEVLCSAYPGTIYDDSGVETFDLPGEPNLTLGRCFIE

## Sheet: other plants
Supplementary Table 2 Analysis and distribution of conserved motifs in Secale cereale L. and other plants SPL proteins.
Motif	Width	Best possible match
1	34	RFHLLQEFDEKKRSCRRRLAGHNRRRRKPQPDAM
2	29	CQVEGCKADLSGAKDYHRRHKVCEYHSKA
3	15	VVVAGLEQRFCQQCS
4	50	RTDKIVFKLFGKEPNDFPPDLRDQILNWLSHYPTDMESYIRPGCIILTIY
5	50	ITPLHIAATIDDAEDVLDALTDDPQQIGIKCWKNARDDTGFTPEDYARFR
6	41	CVTPIWVEYGKTINFVVKGFNITQPTTRIICIFEGKYIIQE
7	21	DEPVIGLKLGKRTYFEDVCGY
8	29	FNTWRFRWLLIFAMEREWCAVIKMLLDIL
9	29	YRPYMHSMMAIAAVCVCVCIIMHTLPRVY
10	21	IPDSNCALSLLSNQPWGATTH
